# Supplementary material for: Whole genome sequencing of one complex pedigree illustrates challenges with genomic medicine
Source: PubMed Central journal article supplement (PMC5322674; doi:10.1186/s12920-017-0246-5), 2017-02-23
Supplement: 12920_2017_246_MOESM2_ESM.pdf [file 12920_2017_246_MOESM2_ESM.pdf]

**ORDERING PROVIDER**

,

**SPECIMEN**

Collection Date:

Received Date:

Report Date:

**PATIENT**

Name:

Date of Birth:

Patient ID:

Gender:

Clinical Indication:

---

[Detailed clinical description.]

**TEST RESULTS SUMMARY**

---

Primary Result(s): [Findings related to clinical indication.]

Incidental/Secondary Result(s): [Incidental findings.]

PRIMARY/DIAGNOSTIC SEQUENCE VARIANT(S) DETECTED

| Gene    | Nucleotide Change | Protein Change | Zygoty | Tute Dx                                                          |
|---------|-------------------|----------------|--------|------------------------------------------------------------------|
| HFE     | c.845G>A          | p.C282Y        | het    | Hereditary hemochromatosis Hemochromatosis, juvenile, digenic    |
| CFTR    | c.4056G>C         | p.Q1352H       | het    | Cystic fibrosis;Congenital bilateral absence of the vas deferens |
| C9      | c.346C>T          | p.R116X        | het    | Complement component 9 deficiency                                |
| BRIP1   | c.139C>G          | p.P47A         | het    | Breast cancer, early-onset                                       |
| F5      | c.1601A>G         | p.Q534R        | hom    | Thrombophilia due to factor V Leiden                             |
| DPYD    | c.85C>T           | p.R29C         | hom    | Dihydropyrimidine dehydrogenase deficiency;not provided          |
| PRSS1   | c.86A>T           | p.N29I         | het    | Hereditary pancreatitis;Hereditary pancreatitis                  |
| FUT2    | c.461G>A          | p.W154X        | het    | Norwalk virus infection, resistance to                           |
| PRSS1   | c.47C>T           | p.A16V         | het    | Hereditary pancreatitis                                          |
| PRSS1   | c.161A>G          | p.N54S         | het    | Hereditary pancreatitis                                          |
| FGFR4   | c.1162G>A         | p.G388R        | hom    | Cancer progression and tumor cell motility                       |
| ITGB3   | c.176T>C          | p.L59P         | het    | Thrombocytopenia, neonatal alloimmune Posttransfusion purpura    |
| TIRAP   | c.539C>T          | p.S180L        | het    | Malaria, resistance to BACTEREMIA, RESISTANCE TO                 |
| HEXB    | c.185T>C          | p.L62S         | hom    | Sandhoff disease, infantile type                                 |
| BANK1   | c.182G>A          | p.R61H         | hom    | Systemic lupus erythmatosus, association with                    |
| BBS2    | c.209G>A          | p.S70N         | hom    | Bardet-Biedl syndrome 2                                          |
| ITGA2B  | c.2621T>G         | p.I874S        | hom    | Bak platelet-specific antigen                                    |
| FCGR3B  | c.302A>G          | p.N101S        | het    | Neutrophil-specific antigens na1/na2                             |
| SLC24A5 | c.331A>G          | p.T111A        | het    | Skin/hair/eye pigmentation, variation in, 4                      |
| ART4    | c.793G>A          | p.D265N        | het    | DOMBROCK BLOOD GROUP                                             |

## SECONDARY/INCIDENTAL SEQUENCE VARIANT(S) DETECTED

The American College of Medical Genetics and Genomics (ACMG) recently published a policy statement on clinical sequencing that emphasizes the possibility of recognizing and reporting incidental or secondary findings of medical value when conducting exome and genome sequencing. The ACMG recommends that laboratories performing clinical sequencing seek and report mutations of specified classes or types in the genes listed within the guidelines. This section of the report describes variants which fit the criteria outlined by ACMG for the reporting of incidental or secondary findings.

| Gene    | Nucleotide Change | Protein Change | Zygoty | Tute Dx                          |
|---------|-------------------|----------------|--------|----------------------------------|
| MSH2    | c.1168C>T         | p.L390F        | het    | Colorectal cancer, non-polyposis |
| MSH6    | c.3143A>T         | p.Q1048L       | het    | .                                |
| MUTYH   | c.1276C>T         | p.R426C        | het    | Adenomatous polyposis coli       |
| SDHD    | c.371A>G          | p.Q124R        | hom    | .                                |
| CACNA1S | c.5399T>C         | p.L1800S       | het    | .                                |
| FBN1    | c.1415G>A         | p.C472Y        | hom    | .                                |
| APOB    | c.1853C>T         | p.A618V        | het    | .                                |
| TP53    | c.215C>G          | p.P72R         | het    | .                                |
| BRCA2   | c.7397T>C         | p.V2466A       | hom    | Breast cancer                    |
| MUTYH   | c.1014G>C         | p.Q338H        | het    | .                                |
| MEN1    | c.1636A>G         | p.T546A        | hom    | .                                |
| BRCA1   | c.2612C>T         | p.P871L        | het    | .                                |
| DSG2    | c.2318G>A         | p.R773K        | het    | .                                |
| APC     | c.5465T>A         | p.V1822D       | hom    | .                                |
| PMS2    | c.1621A>G         | p.K541E        | hom    | Colorectal cancer, non-polyposis |
| COL3A1  | c.4059T>G         | p.H1353Q       | hom    | .                                |
| MYLK    | c.1486C>G         | p.L496V        | hom    | .                                |
| PCSK9   | c.1420G>A         | p.V474I        | hom    | .                                |
| TNNT2   | c.758A>G          | p.K253R        | het    | .                                |
| APOB    | c.13013G>A        | p.S4338N       | het    | .                                |

## INTERPRETATION OF PRIMARY FINDINGS

### c.845G>A

The patient is heterozygous for a common missense polymorphism in the HFE gene which occurs at a frequency of 0.013% in the 1000 genomes project. OMIM reports 6 phenotypes associated with variants in the HFE gene including Hemochromatosis, [Transferrin serum level QTL2], susceptibility to Alzheimer disease, Microvascular complications of diabetes 7, susceptibility to Porphyria cutanea tarda, susceptibility to Porphyria variegata. This variant causes a nonsynonymous severe amino acid substitution (p.C282Y) which may alter protein function. ClinVar classifies this variant as

acid substitution (p.Q202T) which may alter protein function. ClinVar classifies this variant as pathogenic, other and non-pathogenic and reports an association with Hereditary hemochromatosis, Porphyria cutanea tarda (susceptibility to), Porphyria variegata (susceptibility to), Hemochromatosis (juvenile) (digenic), Alzheimer disease (susceptibility to), Transferrin serum level quantitative trait locus 2, Microvascular complications of diabetes 7, not specified. This variant is predicted to be deleterious by SIFT and deleterious by PolyPhen2.

#### *c.4056G>C*

The patient is heterozygous for a common missense polymorphism in the CFTR gene which occurs at a frequency of 0.0042% in the 1000 genomes project. OMIM reports 6 phenotypes associated with variants in the CFTR gene including Congenital bilateral absence of vas deferens, Cystic fibrosis, Sweat chloride elevation without CF, modifier of Bronchiectasis with or without elevated sweat chloride 1, Hypertrypsinemia (neonatal), Pancreatitis (idiopathic). This variant causes a nonsynonymous conservative amino acid substitution (p.Q1352H) which may alter protein function. ClinVar classifies this variant as pathogenic and reports an association with Cystic fibrosis; Congenital bilateral absence of the vas deferens. This variant is predicted to be deleterious by SIFT and deleterious by PolyPhen2.

#### *c.346C>T*

The patient is heterozygous for a common nonsense polymorphism in the C9 gene which occurs at a frequency of 0.003% in the 1000 genomes project. OMIM reports 2 phenotypes associated with variants in the C9 gene including C9 deficiency, susceptibility to Macular degeneration (age-related) (15). This variant introduces a premature stop codon which may lead to early termination of protein transcription. ClinVar classifies this variant as pathogenic and reports an association with Complement component 9 deficiency. This variant is predicted to be tolerable by SIFT

#### *c.139C>G*

The patient is heterozygous for a rare missense mutation in the BRIP1 gene which doesn't occur in the 1000 genomes project. OMIM reports 2 phenotypes associated with variants in the BRIP1 gene including Breast cancer (early-onset), Fanconi anemia (complementation group J). This variant causes a nonsynonymous conservative amino acid substitution (p.P47A) which may alter protein function. ClinVar classifies this variant as pathogenic and other and reports an association with Breast cancer (early-onset), Neoplastic Syndromes (Hereditary). This variant is predicted to be deleterious by PolyPhen2.

#### *c.1601A>G*

The patient is homozygous for a common missense polymorphism in the F5 gene which occurs at a frequency of 0.99% in the 1000 genomes project. OMIM reports 6 phenotypes associated with variants in the F5 gene including Factor V deficiency, Thrombophilia due to activated protein C resistance, Budd-Chiari syndrome, susceptibility to Pregnancy loss recurrent 1, susceptibility to Stroke (ischemic), susceptibility to Thrombophilia due to factor V Leiden. This variant causes a nonsynonymous conservative amino acid substitution (p.Q534R) which may alter protein function. ClinVar classifies this variant as pathogenic, untested and other and reports an association with Thrombophilia due to factor V Leiden, Ischemic stroke (susceptibility to), Budd-Chiari syndrome (susceptibility to), Recurrent abortion. This variant is predicted to be tolerable by SIFT

#### *c.85C>T*

The patient is homozygous for a common missense polymorphism in the DPYD gene which occurs at a frequency of 0.74% in the 1000 genomes project. OMIM reports 2 phenotypes associated with variants in the DPYD gene including 5-fluorouracil toxicity, Dihydropyrimidine dehydrogenase deficiency. This variant causes a nonsynonymous severe amino acid substitution (p.R29C) which may alter protein function. ClinVar classifies this variant as pathogenic and reports an association with Dihydropyrimidine dehydrogenase deficiency;. This variant is predicted to be tolerable by SIFT and deleterious by PolyPhen2.

#### *c.86A>T*

The patient is heterozygous for a common missense polymorphism in the PRSS1 gene which

doesn't occur in the 1000 genomes project. OMIM reports 2 phenotypes associated with variants in the PRSS1 gene including Pancreatitis (hereditary), Trypsinogen deficiency. This variant causes a nonsynonymous moderate amino acid substitution (p.N29I) which may alter protein function. ClinVar classifies this variant as pathogenic and reports an association with Hereditary pancreatitis;Hereditary pancreatitis. This variant is predicted to be deleterious by SIFT and benign by PolyPhen2.

#### *c.461G>A*

The patient is heterozygous for a common nonsense polymorphism in the FUT2 gene which occurs at a frequency of 0.32% in the 1000 genomes project. OMIM reports 3 phenotypes associated with variants in the FUT2 gene including [Bombay phenotype], resistance to Norwalk virus infection, Vitamin B12 plasma level QTL1. This variant introduces a premature stop codon which may lead to early termination of protein transcription. ClinVar classifies this variant as non-pathogenic, pathogenic and other and reports an association with SECRETOR/NONSECRETOR POLYMORPHISM, Norwalk virus infection ( resistance to), Vitamin b12 plasma level quantitative trait locus 1. This variant is predicted to be tolerable by SIFT

#### *c.47C>T*

The patient is heterozygous for a common missense polymorphism in the PRSS1 gene which doesn't occur in the 1000 genomes project. OMIM reports 2 phenotypes associated with variants in the PRSS1 gene including Pancreatitis (hereditary), Trypsinogen deficiency. This variant causes a nonsynonymous moderate amino acid substitution (p.A16V) which may alter protein function. ClinVar classifies this variant as pathogenic and reports an association with Hereditary pancreatitis. This variant is predicted to be tolerable by SIFT and benign by PolyPhen2.

#### *c.161A>G*

The patient is heterozygous for a common missense polymorphism in the PRSS1 gene which doesn't occur in the 1000 genomes project. OMIM reports 2 phenotypes associated with variants in the PRSS1 gene including Pancreatitis (hereditary), Trypsinogen deficiency. This variant causes a nonsynonymous conservative amino acid substitution (p.N54S) which may alter protein function. ClinVar classifies this variant as pathogenic and reports an association with Hereditary pancreatitis. This variant is predicted to be tolerable by SIFT and benign by PolyPhen2.

#### *c.1162G>A*

The patient is homozygous for a common missense polymorphism in the FGFR4 gene which occurs at a frequency of 0.3% in the 1000 genomes project. OMIM reports that variants in the FGFR4 gene are associated with Cancer progression/metastasis. This variant causes a nonsynonymous moderate amino acid substitution (p.G388R) which may alter protein function. ClinVar classifies this variant as pathogenic and reports an association with Cancer progression and tumor cell motility. This variant is predicted to be deleterious by SIFT and deleterious by PolyPhen2.

#### *c.176T>C*

The patient is heterozygous for a common missense polymorphism in the ITGB3 gene which occurs at a frequency of 0.089% in the 1000 genomes project. OMIM reports 5 phenotypes associated with variants in the ITGB3 gene including Bleeding disorder (platelet-type) (16) (autosomal dominant), Glanzmann thrombasthenia, Purpura (posttransfusion), Thrombocytopenia (neonatal alloimmune), susceptibility to Myocardial infarction. This variant causes a nonsynonymous moderate amino acid substitution (p.L59P) which may alter protein function. ClinVar classifies this variant as non-pathogenic, pathogenic and other and reports an association with PL(A1)/(A2) ALLOANTIGEN POLYMORPHISM, Thrombocytopenia ( neonatal alloimmune), Posttransfusion purpura, Myocardial infarction, Fracture ( hip) ( susceptibility to). This variant is predicted to be tolerable by SIFT and benign by PolyPhen2.

#### *c.539C>T*

The patient is heterozygous for a common missense polymorphism in the TIRAP gene which occurs at a frequency of 0.086% in the 1000 genomes project. OMIM reports 4 phenotypes

associated with variants in the IIRAP gene including protection against Bacteremia, protection against Malaria, protection against Pneumococcal disease (invasive), protection against Tuberculosis. This variant causes a nonsynonymous moderate amino acid substitution (p.S180L) which may alter protein function. ClinVar classifies this variant as other and pathogenic and reports an association with Invasive pneumococcal disease (protection against), Malaria (resistance to), Mycobacterium tuberculosis (protection against), BACTEREMIA (RESISTANCE TO). This variant is predicted to be possibly deleterious by PolyPhen2.

#### *c.185T>C*

The patient is homozygous for a common missense polymorphism in the HEXB gene which occurs at a frequency of 0.98% in the 1000 genomes project. OMIM reports that variants in the HEXB gene are associated with Sandhoff disease (infantile) (juvenile) (and adult forms). This variant causes a nonsynonymous moderate amino acid substitution (p.L62S) which may alter protein function. ClinVar classifies this variant as pathogenic and reports an association with Sandhoff disease (infantile type). This variant is predicted to be tolerable by SIFT

#### *c.182G>A*

The patient is homozygous for a common missense polymorphism in the BANK1 gene which occurs at a frequency of 0.22% in the 1000 genomes project. OMIM reports that variants in the BANK1 gene are associated with association with Systemic lupus erythematosus. This variant causes a nonsynonymous conservative amino acid substitution (p.R61H) which may alter protein function. ClinVar classifies this variant as pathogenic and reports an association with Systemic lupus erythematosus (association with). This variant is predicted to be tolerable by SIFT and benign by PolyPhen2.

#### *c.209G>A*

The patient is homozygous for a common missense polymorphism in the BBS2 gene which occurs at a frequency of 1.% in the 1000 genomes project. OMIM reports that variants in the BBS2 gene are associated with Bardet-Biedl syndrome 2. This variant causes a nonsynonymous conservative amino acid substitution (p.S70N) which may alter protein function. ClinVar classifies this variant as pathogenic and reports an association with Bardet-Biedl syndrome 2. This variant is predicted to be tolerable by SIFT

#### *c.2621T>G*

The patient is homozygous for a common missense polymorphism in the ITGA2B gene which occurs at a frequency of 0.4% in the 1000 genomes project. OMIM reports 3 phenotypes associated with variants in the ITGA2B gene including Bleeding disorder (platelet-type) (16) (autosomal dominant), Glanzmann thrombasthenia, Thrombocytopenia (neonatal alloimmune) (BAK antigen related). This variant causes a nonsynonymous moderate amino acid substitution (p.I874S) which may alter protein function. ClinVar classifies this variant as pathogenic and reports an association with Bak platelet-specific antigen. This variant is predicted to be tolerable by SIFT and benign by PolyPhen2.

#### *c.302A>G*

The patient is heterozygous for a common missense polymorphism in the FCGR3B gene which occurs at a frequency of 0.53% in the 1000 genomes project. OMIM reports that variants in the FCGR3B gene are associated with Neutropenia (alloimmune neonatal). This variant causes a nonsynonymous conservative amino acid substitution (p.N101S) which may alter protein function. ClinVar classifies this variant as pathogenic and reports an association with Neutrophil-specific antigens na1/na2. This variant is predicted to be tolerable by SIFT

#### *c.331A>G*

The patient is heterozygous for a common missense polymorphism in the SLC24A5 gene which occurs at a frequency of 0.56% in the 1000 genomes project. OMIM reports 2 phenotypes associated with variants in the SLC24A5 gene including Albinism (oculocutaneous) (type VI), [Skin/hair/eye pigmentation 4 (fair)/dark skin]. This variant causes a nonsynonymous moderate amino acid substitution (p.T111A) which may alter protein function. ClinVar classifies this variant as

amino acid substitution (p.D265N) which may alter protein function. ClinVar classifies this variant as pathogenic and reports an association with Skin/hair/eye pigmentation ( variation in) ( 4). This variant is predicted to be tolerable by SIFT and benign by PolyPhen2.

#### *c.793G>A*

The patient is heterozygous for a common missense polymorphism in the ART4 gene which occurs at a frequency of 0.29% in the 1000 genomes project. OMIM reports that variants in the ART4 gene are associated with [Blood group (Dombrock)]. This variant causes a nonsynonymous conservative amino acid substitution (p.D265N) which may alter protein function. ClinVar classifies this variant as pathogenic and reports an association with DOMBROCK BLOOD GROUP. This variant is predicted to be tolerable by SIFT and benign by PolyPhen2.

### INTERPRETATION OF SECONDARY FINDINGS

---

#### *c.1168C>T*

The patient is heterozygous for a common missense polymorphism in the MSH2 gene which occurs at a frequency of 0.0028% in the 1000 genomes project. OMIM reports 3 phenotypes associated with variants in the MSH2 gene including Colorectal cancer (hereditary nonpolyposis) (type 1), Mismatch repair cancer syndrome, Muir-Torre syndrome. This variant causes a nonsynonymous conservative amino acid substitution (p.L390F) which may alter protein function. ClinVar classifies this variant as unknown, non-pathogenic and other and reports an association with , Lynch syndrome, not specified, Neoplastic Syndromes ( Hereditary). This variant is predicted to be deleterious by SIFT and benign by PolyPhen2.

#### *c.3143A>T*

The patient is heterozygous for a rare mutation in the MSH6 gene which doesn't occur in the 1000 genomes project. OMIM reports 3 phenotypes associated with variants in the MSH6 gene including Colorectal cancer (hereditary nonpolyposis) (type 5), Endometrial cancer (familial), Mismatch repair cancer syndrome. This variant causes a nonsynonymous moderate amino acid substitution (p.Q1048L) which may alter protein function. This variant is predicted to be tolerable by SIFT and benign by PolyPhen2.

#### *c.1276C>T*

The patient is heterozygous for a rare missense mutation in the MUTYH gene which doesn't occur in the 1000 genomes project. OMIM reports 3 phenotypes associated with variants in the MUTYH gene including Adenomas (multiple colorectal), Colorectal adenomatous polyposis (autosomal recessive) (with pilomatricomas), Gastric cancer (somatic). This variant causes a nonsynonymous severe amino acid substitution (p.R426C) which may alter protein function. ClinVar classifies this variant as unknown and other and reports an association with , Neoplastic Syndromes ( Hereditary), MYH-associated polyposis. Invitae classifies this variant as Variant of uncertain significance. This variant is predicted to be tolerable by SIFT and deleterious by PolyPhen2.

#### *c.371A>G*

The patient is homozygous for a common missense polymorphism in the SDHD gene which occurs at a frequency of 0.95% in the 1000 genomes project. OMIM reports 6 phenotypes associated with variants in the SDHD gene including Carcinoid tumors (intestinal), Cowden syndrome 3, Merkel cell carcinoma (somatic), Paraganglioma and gastric stromal sarcoma, Paragangliomas 1 (with or without deafness), Pheochromocytoma. This variant causes a nonsynonymous conservative amino acid substitution (p.Q124R) which may alter protein function. This variant is predicted to be tolerable by SIFT

#### *c.5399T>C*

The patient is heterozygous for a common missense polymorphism in the CACNA1S gene which occurs at a frequency of 0.23% in the 1000 genomes project. OMIM reports 3 phenotypes associated with variants in the CACNA1S gene including Hypokalemic periodic paralysis (type 1)

associated with variants in the CRYBB3 gene including Hyperkalemic periodic paralysis (type 1), Malignant hyperthermia susceptibility 5, susceptibility to Thyrotoxic periodic paralysis 1. This variant causes a nonsynonymous moderate amino acid substitution (p.L1800S) which may alter protein function. This variant is predicted to be deleterious by SIFT and deleterious by PolyPhen2.

#### *c.1415G>A*

The patient is homozygous for a common missense polymorphism in the FBN1 gene which occurs at a frequency of 1.1% in the 1000 genomes project. OMIM reports 8 phenotypes associated with variants in the FBN1 gene including Acromicric dysplasia, Aortic aneurysm (ascending) (and dissection), Ectopia lentis (familial), Geleophysic dysplasia 2, MASS syndrome, Marfan syndrome, Stiff skin syndrome, Weill-Marchesani syndrome 2 (dominant). This variant causes a nonsynonymous severe amino acid substitution (p.C472Y) which may alter protein function. This variant is predicted to be tolerable by SIFT and benign by PolyPhen2.

#### *c.1853C>T*

The patient is heterozygous for a common missense polymorphism in the APOB gene which occurs at a frequency of 0.48% in the 1000 genomes project. OMIM reports 2 phenotypes associated with variants in the APOB gene including Hypercholesterolemia (due to ligand-defective apo B), Hypobetalipoproteinemia. This variant causes a nonsynonymous moderate amino acid substitution (p.A618V) which may alter protein function. ClinVar classifies this variant as probable-non-pathogenic and reports an association with not specified. This variant is predicted to be tolerable by SIFT and deleterious by PolyPhen2.

#### *c.215C>G*

The patient is heterozygous for a common missense polymorphism in the TP53 gene which occurs at a frequency of 0.54% in the 1000 genomes project. OMIM reports 11 phenotypes associated with variants in the TP53 gene including Adrenal cortical carcinoma, Breast cancer, Choroid plexus papilloma, Colorectal cancer, Hepatocellular carcinoma, Li-Fraumeni syndrome, Nasopharyngeal carcinoma, Osteosarcoma, Pancreatic cancer, Basal cell carcinoma 7, Glioma susceptibility 1. This variant causes a nonsynonymous moderate amino acid substitution (p.P72R) which may alter protein function. ClinVar classifies this variant as non-pathogenic and reports an association with CODON 72 POLYMORPHISM (rs1042522), not specified, Neoplastic Syndromes (Hereditary). This variant is predicted to be tolerable by SIFT and possibly deleterious by PolyPhen2.

#### *c.7397T>C*

The patient is homozygous for a common missense polymorphism in the BRCA2 gene which occurs at a frequency of 0.98% in the 1000 genomes project. OMIM reports 9 phenotypes associated with variants in the BRCA2 gene including Fanconi anemia (complementation group D1), Pancreatic cancer, Prostate cancer, Wilms tumor, susceptibility to Breast cancer (male), Breast-ovarian cancer (familial) (2), Glioblastoma 3, Medulloblastoma, Pre-B-cell acute lymphoblastic leukemia. This variant causes a nonsynonymous moderate amino acid substitution (p.V2466A) which may alter protein function. ClinVar classifies this variant as untested, unknown and non-pathogenic and reports an association with Familial cancer of breast, Breast-ovarian cancer (familial 2), not specified. This variant is predicted to be tolerable by SIFT

#### *c.1014G>C*

The patient is heterozygous for a common missense polymorphism in the MUTYH gene which occurs at a frequency of 0.31% in the 1000 genomes project. OMIM reports 3 phenotypes associated with variants in the MUTYH gene including Adenomas (multiple colorectal), Colorectal adenomatous polyposis (autosomal recessive) (with pilomatricomas), Gastric cancer (somatic). This variant causes a nonsynonymous conservative amino acid substitution (p.Q338H) which may alter protein function. ClinVar classifies this variant as non-pathogenic and reports an association with not specified, Neoplastic Syndromes (Hereditary). This variant is predicted to be tolerable by SIFT and possibly deleterious by PolyPhen2.

#### *c.1636A>G*

The patient is homozygous for a common missense polymorphism in the MEN1 gene which



occurs at a frequency of 0.83% in the 1000 genomes project. OMIM reports 6 phenotypes associated with variants in the MEN1 gene including Adrenal adenoma (somatic), Angiofibroma (somatic), Carcinoid tumor of lung, Lipoma (somatic), Multiple endocrine neoplasia 1, Parathyroid adenoma (somatic). This variant causes a nonsynonymous moderate amino acid substitution (p.T546A) which may alter protein function. ClinVar classifies this variant as non-pathogenic and reports an association with , not specified. This variant is predicted to be tolerable by SIFT and benign by PolyPhen2.

#### *c.2612C>T*

The patient is heterozygous for a common missense polymorphism in the BRCA1 gene which occurs at a frequency of 0.54% in the 1000 genomes project. OMIM reports 2 phenotypes associated with variants in the BRCA1 gene including Breast-ovarian cancer (familial) (1), susceptibility to Pancreatic cancer 4. This variant causes a nonsynonymous moderate amino acid substitution (p.P871L) which may alter protein function. This variant is predicted to be tolerable by SIFT and benign by PolyPhen2.

#### *c.2318G>A*

The patient is heterozygous for a common missense polymorphism in the DSG2 gene which occurs at a frequency of 0.24% in the 1000 genomes project. OMIM reports 2 phenotypes associated with variants in the DSG2 gene including Arrhythmogenic right ventricular dysplasia 10, Cardiomyopathy (dilated) (1BB). This variant causes a nonsynonymous conservative amino acid substitution (p.R773K) which may alter protein function. ClinVar classifies this variant as non-pathogenic and reports an association with not specified. This variant is predicted to be tolerable by SIFT and benign by PolyPhen2.

#### *c.5465T>A*

The patient is homozygous for a common missense polymorphism in the APC gene which occurs at a frequency of 0.87% in the 1000 genomes project. OMIM reports 8 phenotypes associated with variants in the APC gene including Adenoma (periampullary) (somatic), Adenomatous polyposis coli, Brain tumor-polyposis syndrome 2, Colorectal cancer (somatic), Desmoid disease (hereditary), Gardner syndrome, Gastric cancer (somatic), Hepatoblastoma (somatic). This variant causes a nonsynonymous severe amino acid substitution (p.V1822D) which may alter protein function. ClinVar classifies this variant as non-pathogenic and other and reports an association with Adenomatous polyposis coli, , not specified, Familial colorectal cancer, Neoplastic Syndromes ( Hereditary). This variant is predicted to be benign by PolyPhen2.

#### *c.1621A>G*

The patient is homozygous for a common missense polymorphism in the PMS2 gene which occurs at a frequency of 0.88% in the 1000 genomes project. OMIM reports 2 phenotypes associated with variants in the PMS2 gene including Colorectal cancer (hereditary nonpolyposis) (type 4), Mismatch repair cancer syndrome. This variant causes a nonsynonymous moderate amino acid substitution (p.K541E) which may alter protein function. ClinVar classifies this variant as non-pathogenic and reports an association with Lynch syndrome. This variant is predicted to be tolerable by SIFT and benign by PolyPhen2.

#### *c.4059T>G*

The patient is homozygous for a common missense polymorphism in the COL3A1 gene which occurs at a frequency of 1.% in the 1000 genomes project. OMIM reports 2 phenotypes associated with variants in the COL3A1 gene including Ehlers-Danlos syndrome (type III), Ehlers-Danlos syndrome (type IV). This variant causes a nonsynonymous conservative amino acid substitution (p.H1353Q) which may alter protein function. This variant is predicted to be tolerable by SIFT and benign by PolyPhen2.

#### *c.1486C>G*

The patient is homozygous for a common missense polymorphism in the MYLK gene which occurs at a frequency of 1.% in the 1000 genomes project. OMIM reports that variants in the MYLK

gene are associated with Aortic aneurysm (familial thoracic /). This variant causes a nonsynonymous conservative amino acid substitution (p.L496V) which may alter protein function. This variant is predicted to be tolerable by SIFT and benign by PolyPhen2.

#### *c.1420G>A*

The patient is homozygous for a common missense polymorphism in the PCSK9 gene which occurs at a frequency of 0.87% in the 1000 genomes project. OMIM reports 2 phenotypes associated with variants in the PCSK9 gene including Hypercholesterolemia (familial) (3), Low density lipoprotein cholesterol level QTL 1. This variant causes a nonsynonymous conservative amino acid substitution (p.V474I) which may alter protein function. This variant is predicted to be tolerable by SIFT and benign by PolyPhen2.

#### *c.758A>G*

The patient is heterozygous for a common missense polymorphism in the TNNT2 gene which occurs at a frequency of 0.097% in the 1000 genomes project. OMIM reports 4 phenotypes associated with variants in the TNNT2 gene including Cardiomyopathy (dilated) (1D), Cardiomyopathy (familial hypertrophic) (2), Cardiomyopathy (familial restrictive) (3), Left ventricular noncompaction 6. This variant causes a nonsynonymous conservative amino acid substitution (p.K253R) which may alter protein function. ClinVar classifies this variant as non-pathogenic and reports an association with not specified. This variant is predicted to be tolerable by SIFT and benign by PolyPhen2.

#### *c.13013G>A*

The patient is heterozygous for a common missense polymorphism in the APOB gene which occurs at a frequency of 0.63% in the 1000 genomes project. OMIM reports 2 phenotypes associated with variants in the APOB gene including Hypercholesterolemia (due to ligand-defective apo B), Hypobetalipoproteinemia. This variant causes a nonsynonymous conservative amino acid substitution (p.S4338N) which may alter protein function. ClinVar classifies this variant as probable-non-pathogenic and reports an association with not specified. This variant is predicted to be tolerable by SIFT and benign by PolyPhen2.

## RECOMMENDATIONS

---

Genetic counseling of the family is recommended to discuss the implications of this report.  
[Additional recommendations.]

## METHODS AND LIMITATIONS

---

This report is a sample to be used solely for the purpose of evaluating functionality of the Tute Platform and should not be used in any clinical application.

### Sequencing and Variant Detection

Whole exome sequencing was performed by solution-based hybridization which enriches for coding exons targeting DNA with specific baits. Sequencing was performed using the Illumina HiSeq 2500 to a minimum average exome depth of 90X. Sequencing reads were aligned to the reference genome (hg19) by BWA-MEM and variants were called using FreeBayes.

### Variant Analysis and Report Generation

Reported variants were analyzed using the Tute platform to identify those variants which are reported by medical literature to be pathogenic. All non-synonymous variants of allele frequency <1% reported by the 1000 genomes project and annotated as 'Pathogenic' or 'Probably Pathogenic' by ClinVar are reported in the table 'Primary/Diagnostic Sequence Variant(s) Detected'. Careful correlation of these variants with the clinical indications for the proband should be conducted by an experience medical geneticist to verify that reported findings are consistent with reported clinical phenotypes. Additionally, variants are included based on ACMG guidelines for the reporting of incidental findings in the table 'Secondary/Incidental Sequence Variant(s) Detected'.

### Validation of reported findings

Variants of interest should be confirmed by Sanger sequencing. The DNA immediately flanking each of these variants should be amplified genomic DNA followed by sequencing in both directions using fluorescent dideoxy sequencing.

### Limitations

Absence of a primary diagnostic finding identified by this test does not exclude the possibility of a genetic basis for the clinical condition for this proband. Certain genetic abnormalities are not detectable by the technologies used to generate this report. Specifically, detection of abnormal variants depends on the presence of these sequence variants in the sequencing data. This exome sequence test is designed to evaluate single nucleotide variants within the human exome; however, this technology is only able to sequence 90-95% of the human reference to the requisite 10-fold coverage needed for reliable detection of heterozygous variants.

Additionally, certain types of genetic abnormalities are difficult to identify in sequencing data and have not been validated for clinical use including insertions, deletions, copy number alterations, long repetitive sequences, triplet repeat expansions, chromosomal rearrangements, polyploidy, repetitive regions including mono-, di- and tri-nucleotide repeats, GX rich regions, intronic variants outside the splice-site and epigenetic effects.

Variants believed to be benign based on medical literature, or with population frequencies greater than or equal to 1%, or resulting in synonymous amino acid changes, or occurring in 5' or 3' untranslated regions are generally not reported.

This report is a sample to be used solely for the purpose of evaluating functionality of the Tute Platform and should not be used in any clinical application.

## Sources

---

### REPORT SIGNATURES

---

Online Mendelian Inheritance in Man, OMIM (TM). Retrieved 0/26/2015 from <http://www.ncbi.nlm.nih.gov/omim/>  
ClinVar. Retrieved 0/26/2015 from <http://www.ncbi.nlm.nih.gov/clinvar/>

**ORDERING PROVIDER**

,

**SPECIMEN**

Collection Date:

Received Date:

Report Date:

**PATIENT**

Name:

Date of Birth:

Patient ID:

Gender:

Clinical Indication:

---

[Detailed clinical description.]

**TEST RESULTS SUMMARY**

---

Primary Result(s): [Findings related to clinical indication.]

Incidental/Secondary Result(s): [Incidental findings.]

PRIMARY/DIAGNOSTIC SEQUENCE VARIANT(S) DETECTED

| Gene  | Nucleotide Change | Protein Change | Zygoty | Tute Dx                                                                         |
|-------|-------------------|----------------|--------|---------------------------------------------------------------------------------|
| HFE   | c.845G>A          | p.C282Y        | het    | Hereditary hemochromatosis Hemochromatosis, juvenile, digenic                   |
| MKKS  | c.724G>T          | p.A242S        | het    | McKusick Kaufman syndrome                                                       |
| BRIP1 | c.139C>G          | p.P47A         | het    | Breast cancer, early-onset                                                      |
| F5    | c.1601A>G         | p.Q534R        | hom    | Thrombophilia due to factor V Leiden                                            |
| TGM1  | c.1552G>A         | p.V518M        | het    | Autosomal recessive congenital ichthyosis 1                                     |
| DPYD  | c.85C>T           | p.R29C         | hom    | Dihydropyrimidine dehydrogenase deficiency;not provided                         |
| PRSS1 | c.86A>T           | p.N29I         | het    | Hereditary pancreatitis;Hereditary pancreatitis                                 |
| FUT2  | c.461G>A          | p.W154X        | het    | Norwalk virus infection, resistance to                                          |
| PRSS1 | c.47C>T           | p.A16V         | het    | Hereditary pancreatitis                                                         |
| PRSS1 | c.161A>G          | p.N54S         | het    | Hereditary pancreatitis                                                         |
| ELAC2 | c.1621G>A         | p.A541T        | het    | Prostate cancer, hereditary, 2                                                  |
| OCA2  | c.913C>T          | p.R305W        | het    | Skin/hair/eye pigmentation, variation in, 1                                     |
| PRF1  | c.755A>G          | p.N252S        | het    | Hemophagocytic lymphohistiocytosis, familial, 2 Malignant lymphoma, non-Hodgkin |
| KRT85 | c.233G>A          | p.R78H         | het    | Ectodermal dysplasia, 'pure' hair-nail type                                     |
| FGFR4 | c.1162G>A         | p.G388R        | het    | Cancer progression and tumor cell motility                                      |
| ITGB3 | c.176T>C          | p.L59P         | hom    | Thrombocytopenia, neonatal alloimmune Posttransfusion purpura                   |
| CST3  | c.73G>A           | p.A25T         | het    | Age-related macular degeneration 11                                             |
| HEXB  | c.185T>C          | p.L62S         | hom    | Sandhoff disease, infantile type                                                |
| BBS2  | c.209G>A          | p.S70N         | hom    | Bardet-Biedl syndrome 2                                                         |
| KLK1  | c.230G>A          | p.R77H         | het    | Kallikrein, decreased urinary activity of                                       |

## SECONDARY/INCIDENTAL SEQUENCE VARIANT(S) DETECTED

The American College of Medical Genetics and Genomics (ACMG) recently published a policy statement on clinical sequencing that emphasizes the possibility of recognizing and reporting incidental or secondary findings of medical value when conducting exome and genome sequencing. The ACMG recommends that laboratories performing clinical sequencing seek and report mutations of specified classes or types in the genes listed within the guidelines. This section of the report describes variants which fit the criteria outlined by ACMG for the reporting of incidental or secondary findings.

| Gene   | Nucleotide Change | Protein Change | Zygoty | Tute Dx                                  |
|--------|-------------------|----------------|--------|------------------------------------------|
| RYR1   | c.7336G>T         | p.G2446C       | het    | .                                        |
| PMS2   | c.59G>A           | p.R20Q         | het    | Colorectal cancer, non-polyposis         |
| SDHD   | c.371A>G          | p.Q124R        | hom    | .                                        |
| FBN1   | c.1415G>A         | p.C472Y        | hom    | .                                        |
| SCN5A  | c.1673A>G         | p.H558R        | het    | Progressive familial heart block type 1A |
| DSC2   | c.2326A>G         | p.I776V        | het    | .                                        |
| APOB   | c.1853C>T         | p.A618V        | het    | .                                        |
| TP53   | c.215C>G          | p.P72R         | het    | .                                        |
| BRCA2  | c.7397T>C         | p.V2466A       | hom    | Breast cancer                            |
| MUTYH  | c.1014G>C         | p.Q338H        | het    | .                                        |
| MEN1   | c.1636A>G         | p.T546A        | hom    | .                                        |
| DSG2   | c.2318G>A         | p.R773K        | het    | .                                        |
| APC    | c.5465T>A         | p.V1822D       | het    | .                                        |
| PMS2   | c.1621A>G         | p.K541E        | hom    | Colorectal cancer, non-polyposis         |
| COL3A1 | c.4059T>G         | p.H1353Q       | hom    | .                                        |
| BRCA2  | c.1114A>C         | p.N372H        | het    | .                                        |
| MYLK   | c.1486C>G         | p.L496V        | hom    | .                                        |
| PCSK9  | c.1420G>A         | p.V474I        | hom    | .                                        |
| APOB   | c.13013G>A        | p.S4338N       | hom    | .                                        |
| PCSK9  | c.2009G>A         | p.G670E        | hom    | .                                        |

## INTERPRETATION OF PRIMARY FINDINGS

### *c.845G>A*

The patient is heterozygous for a common missense polymorphism in the HFE gene which occurs at a frequency of 0.013% in the 1000 genomes project. OMIM reports 6 phenotypes associated with

variants in the HFE gene including Hemochromatosis, [Transferrin serum level QTL2], susceptibility to Alzheimer disease, Microvascular complications of diabetes 7, susceptibility to Porphyria cutanea tarda, susceptibility to Porphyria variegata. This variant causes a nonsynonymous severe amino acid substitution (p.C282Y) which may alter protein function. ClinVar classifies this variant as pathogenic, other and non-pathogenic and reports an association with Hereditary hemochromatosis, Porphyria cutanea tarda (susceptibility to), Porphyria variegata (susceptibility to), Hemochromatosis (juvenile) (digenic), Alzheimer disease (susceptibility to), Transferrin serum level quantitative trait locus 2, Microvascular complications of diabetes 7, not specified. This variant is predicted to be deleterious by SIFT and deleterious by PolyPhen2.

#### *c.724G>T*

The patient is heterozygous for a rare missense mutation in the MKKS gene which occurs at a frequency of 0.0018% in the 1000 genomes project. OMIM reports 2 phenotypes associated with variants in the MKKS gene including Bardet-Biedl syndrome 6, McKusick-Kaufman syndrome. This variant causes a nonsynonymous moderate amino acid substitution (p.A242S) which may alter protein function. ClinVar classifies this variant as pathogenic and reports an association with McKusick Kaufman syndrome. This variant is predicted to be tolerable by SIFT and deleterious by PolyPhen2.

#### *c.139C>G*

The patient is heterozygous for a rare missense mutation in the BRIP1 gene which doesn't occur in the 1000 genomes project. OMIM reports 2 phenotypes associated with variants in the BRIP1 gene including Breast cancer (early-onset), Fanconi anemia (complementation group J). This variant causes a nonsynonymous conservative amino acid substitution (p.P47A) which may alter protein function. ClinVar classifies this variant as pathogenic and other and reports an association with Breast cancer (early-onset), Neoplastic Syndromes (Hereditary). This variant is predicted to be deleterious by PolyPhen2.

#### *c.1601A>G*

The patient is homozygous for a common missense polymorphism in the F5 gene which occurs at a frequency of 0.99% in the 1000 genomes project. OMIM reports 6 phenotypes associated with variants in the F5 gene including Factor V deficiency, Thrombophilia due to activated protein C resistance, Budd-Chiari syndrome, susceptibility to Pregnancy loss recurrent 1, susceptibility to Stroke (ischemic), susceptibility to Thrombophilia due to factor V Leiden. This variant causes a nonsynonymous conservative amino acid substitution (p.Q534R) which may alter protein function. ClinVar classifies this variant as pathogenic, untested and other and reports an association with Thrombophilia due to factor V Leiden, Ischemic stroke (susceptibility to), Budd-Chiari syndrome (susceptibility to), Recurrent abortion. This variant is predicted to be tolerable by SIFT

#### *c.1552G>A*

The patient is heterozygous for a common missense polymorphism in the TGM1 gene which occurs at a frequency of 0.0036% in the 1000 genomes project. OMIM reports that variants in the TGM1 gene are associated with Ichthyosis (congenital) (autosomal recessive 1). This variant causes a nonsynonymous conservative amino acid substitution (p.V518M) which may alter protein function. ClinVar classifies this variant as pathogenic and reports an association with Autosomal recessive congenital ichthyosis 1. This variant is predicted to be tolerable by SIFT and deleterious by PolyPhen2.

#### *c.85C>T*

The patient is homozygous for a common missense polymorphism in the DPYD gene which occurs at a frequency of 0.74% in the 1000 genomes project. OMIM reports 2 phenotypes associated with variants in the DPYD gene including 5-fluorouracil toxicity, Dihydropyrimidine dehydrogenase deficiency. This variant causes a nonsynonymous severe amino acid substitution (p.R29C) which may alter protein function. ClinVar classifies this variant as pathogenic and reports an association with Dihydropyrimidine dehydrogenase deficiency; This variant is predicted to be tolerable by SIFT and deleterious by PolyPhen2.



### *c.86A>T*

The patient is heterozygous for a common missense polymorphism in the PRSS1 gene which doesn't occur in the 1000 genomes project. OMIM reports 2 phenotypes associated with variants in the PRSS1 gene including Pancreatitis (hereditary), Trypsinogen deficiency. This variant causes a nonsynonymous moderate amino acid substitution (p.N29I) which may alter protein function. ClinVar classifies this variant as pathogenic and reports an association with Hereditary pancreatitis;Hereditary pancreatitis. This variant is predicted to be deleterious by SIFT and benign by PolyPhen2.

### *c.461G>A*

The patient is heterozygous for a common nonsense polymorphism in the FUT2 gene which occurs at a frequency of 0.32% in the 1000 genomes project. OMIM reports 3 phenotypes associated with variants in the FUT2 gene including [Bombay phenotype], resistance to Norwalk virus infection, Vitamin B12 plasma level QTL1. This variant introduces a premature stop codon which may lead to early termination of protein transcription. ClinVar classifies this variant as non-pathogenic, pathogenic and other and reports an association with SECRETOR/NONSECRETOR POLYMORPHISM, Norwalk virus infection ( resistance to), Vitamin b12 plasma level quantitative trait locus 1. This variant is predicted to be tolerable by SIFT

### *c.47C>T*

The patient is heterozygous for a common missense polymorphism in the PRSS1 gene which doesn't occur in the 1000 genomes project. OMIM reports 2 phenotypes associated with variants in the PRSS1 gene including Pancreatitis (hereditary), Trypsinogen deficiency. This variant causes a nonsynonymous moderate amino acid substitution (p.A16V) which may alter protein function. ClinVar classifies this variant as pathogenic and reports an association with Hereditary pancreatitis. This variant is predicted to be tolerable by SIFT and benign by PolyPhen2.

### *c.161A>G*

The patient is heterozygous for a common missense polymorphism in the PRSS1 gene which doesn't occur in the 1000 genomes project. OMIM reports 2 phenotypes associated with variants in the PRSS1 gene including Pancreatitis (hereditary), Trypsinogen deficiency. This variant causes a nonsynonymous conservative amino acid substitution (p.N54S) which may alter protein function. ClinVar classifies this variant as pathogenic and reports an association with Hereditary pancreatitis. This variant is predicted to be tolerable by SIFT and benign by PolyPhen2.

### *c.1621G>A*

The patient is heterozygous for a common missense polymorphism in the ELAC2 gene which occurs at a frequency of 0.023% in the 1000 genomes project. OMIM reports 2 phenotypes associated with variants in the ELAC2 gene including Combined oxidative phosphorylation deficiency 17, susceptibility to Prostate cancer (hereditary) (2). This variant causes a nonsynonymous moderate amino acid substitution (p.A541T) which may alter protein function. ClinVar classifies this variant as pathogenic and reports an association with Prostate cancer ( hereditary) ( 2). This variant is predicted to be tolerable by SIFT and possibly deleterious by PolyPhen2.

### *c.913C>T*

The patient is heterozygous for a common missense polymorphism in the OCA2 gene which occurs at a frequency of 0.083% in the 1000 genomes project. OMIM reports 4 phenotypes associated with variants in the OCA2 gene including Albinism (brown oculocutaneous), Albinism (oculocutaneous) (type II), [Skin/hair/eye pigmentation 1 (blond)/brown hair], [Skin/hair/eye pigmentation 1 (blue)/nonblue eyes]. This variant causes a nonsynonymous moderate amino acid substitution (p.R305W) which may alter protein function. ClinVar classifies this variant as pathogenic and reports an association with Skin/hair/eye pigmentation ( variation in) ( 1). This variant is predicted to be deleterious by SIFT and possibly deleterious by PolyPhen2.

### *c.755A>G*

The patient is heterozygous for a common missense polymorphism in the PPF1 gene which occurs

The patient is heterozygous for a common missense polymorphism in the PRF1 gene which occurs at a frequency of 0.0076% in the 1000 genomes project. OMIM reports 2 phenotypes associated with variants in the PRF1 gene including Hemophagocytic lymphohistiocytosis (familial) (2), Lymphoma (non-Hodgkin). This variant causes a nonsynonymous conservative amino acid substitution (p.N252S) which may alter protein function. ClinVar classifies this variant as pathogenic and reports an association with Hemophagocytic lymphohistiocytosis (familial) (2), Malignant lymphoma (non-Hodgkin). This variant is predicted to be tolerable by SIFT and benign by PolyPhen2.

#### *c.233G>A*

The patient is heterozygous for a common missense polymorphism in the KRT85 gene which occurs at a frequency of 0.033% in the 1000 genomes project. OMIM reports that variants in the KRT85 gene are associated with Ectodermal dysplasia 4 (hair)/nail type. This variant causes a nonsynonymous conservative amino acid substitution (p.R78H) which may alter protein function. ClinVar classifies this variant as pathogenic and untested and reports an association with Ectodermal dysplasia (')'pure' hair-nail type. This variant is predicted to be tolerable by SIFT and benign by PolyPhen2.

#### *c.1162G>A*

The patient is heterozygous for a common missense polymorphism in the FGFR4 gene which occurs at a frequency of 0.3% in the 1000 genomes project. OMIM reports that variants in the FGFR4 gene are associated with Cancer progression/metastasis. This variant causes a nonsynonymous moderate amino acid substitution (p.G388R) which may alter protein function. ClinVar classifies this variant as pathogenic and reports an association with Cancer progression and tumor cell motility. This variant is predicted to be deleterious by SIFT and deleterious by PolyPhen2.

#### *c.176T>C*

The patient is homozygous for a common missense polymorphism in the ITGB3 gene which occurs at a frequency of 0.089% in the 1000 genomes project. OMIM reports 5 phenotypes associated with variants in the ITGB3 gene including Bleeding disorder (platelet-type) (16) (autosomal dominant), Glanzmann thrombasthenia, Purpura (posttransfusion), Thrombocytopenia (neonatal alloimmune), susceptibility to Myocardial infarction. This variant causes a nonsynonymous moderate amino acid substitution (p.L59P) which may alter protein function. ClinVar classifies this variant as non-pathogenic, pathogenic and other and reports an association with PL(A1)/(A2) ALLOANTIGEN POLYMORPHISM, Thrombocytopenia (neonatal alloimmune), Posttransfusion purpura, Myocardial infarction, Fracture (hip) (susceptibility to). This variant is predicted to be tolerable by SIFT and benign by PolyPhen2.

#### *c.73G>A*

The patient is heterozygous for a common missense polymorphism in the CST3 gene which occurs at a frequency of 0.21% in the 1000 genomes project. OMIM reports 2 phenotypes associated with variants in the CST3 gene including Cerebral amyloid angiopathy, Macular degeneration (age-related) (11). This variant causes a nonsynonymous moderate amino acid substitution (p.A25T) which may alter protein function. ClinVar classifies this variant as pathogenic and reports an association with Age-related macular degeneration 11. This variant is predicted to be tolerable by SIFT and benign by PolyPhen2.

#### *c.185T>C*

The patient is homozygous for a common missense polymorphism in the HEXB gene which occurs at a frequency of 0.98% in the 1000 genomes project. OMIM reports that variants in the HEXB gene are associated with Sandhoff disease (infantile) (juvenile) (and adult forms). This variant causes a nonsynonymous moderate amino acid substitution (p.L62S) which may alter protein function. ClinVar classifies this variant as pathogenic and reports an association with Sandhoff disease (infantile type). This variant is predicted to be tolerable by SIFT

#### *c.209G>A*

The patient is homozygous for a common missense polymorphism in the BBS2 gene which

occurs at a frequency of 1.0% in the 1000 genomes project. OMIM reports that variants in the BBS2 gene are associated with Bardet-Biedl syndrome 2. This variant causes a nonsynonymous conservative amino acid substitution (p.S70N) which may alter protein function. ClinVar classifies this variant as pathogenic and reports an association with Bardet-Biedl syndrome 2. This variant is predicted to be tolerable by SIFT

#### *c.230G>A*

The patient is heterozygous for a common missense polymorphism in the KLK1 gene which occurs at a frequency of 0.042% in the 1000 genomes project. OMIM reports that variants in the KLK1 gene are associated with [decreased urinary activity of Kallikrein]. This variant causes a nonsynonymous conservative amino acid substitution (p.R77H) which may alter protein function. ClinVar classifies this variant as pathogenic and reports an association with Kallikrein ( decreased urinary activity of). This variant is predicted to be deleterious by SIFT and possibly deleterious by PolyPhen2.

### INTERPRETATION OF SECONDARY FINDINGS

---

#### *c.7336G>T*

The patient is heterozygous for a rare mutation in the RYR1 gene which doesn't occur in the 1000 genomes project. OMIM reports 5 phenotypes associated with variants in the RYR1 gene including Central core disease, King-Denborough syndrome, Minicore myopathy with external ophthalmoplegia, Neuromuscular disease (congenital) (with uniform type 1 fiber), Malignant hyperthermia susceptibility 1. This variant causes a nonsynonymous severe amino acid substitution (p.G2446C) which may alter protein function. This variant is predicted to be deleterious by SIFT and benign by PolyPhen2.

#### *c.59G>A*

The patient is heterozygous for a common missense polymorphism in the PMS2 gene which occurs at a frequency of 0.076% in the 1000 genomes project. OMIM reports 2 phenotypes associated with variants in the PMS2 gene including Colorectal cancer (hereditary nonpolyposis) (type 4), Mismatch repair cancer syndrome. This variant causes a nonsynonymous conservative amino acid substitution (p.R20Q) which may alter protein function. ClinVar classifies this variant as non-pathogenic and untested and reports an association with , Lynch syndrome, not specified, Neoplastic Syndromes ( Hereditary). This variant is predicted to be tolerable by SIFT and possibly deleterious by PolyPhen2.

#### *c.371A>G*

The patient is homozygous for a common missense polymorphism in the SDHD gene which occurs at a frequency of 0.95% in the 1000 genomes project. OMIM reports 6 phenotypes associated with variants in the SDHD gene including Carcinoid tumors (intestinal), Cowden syndrome 3, Merkel cell carcinoma (somatic), Paraganglioma and gastric stromal sarcoma, Paragangliomas 1 (with or without deafness), Pheochromocytoma. This variant causes a nonsynonymous conservative amino acid substitution (p.Q124R) which may alter protein function. This variant is predicted to be tolerable by SIFT

#### *c.1415G>A*

The patient is homozygous for a common missense polymorphism in the FBN1 gene which occurs at a frequency of 1.0% in the 1000 genomes project. OMIM reports 8 phenotypes associated with variants in the FBN1 gene including Acromicric dysplasia, Aortic aneurysm (ascending) (and dissection), Ectopia lentis (familial), Geleophysic dysplasia 2, MASS syndrome, Marfan syndrome, Stiff skin syndrome, Weill-Marchesani syndrome 2 (dominant). This variant causes a nonsynonymous severe amino acid substitution (p.C472Y) which may alter protein function. This variant is predicted to be tolerable by SIFT and benign by PolyPhen2.

#### *c.1673A>G*

The patient is heterozygous for a common missense polymorphism in the SCN5A gene which occurs at a frequency of 0.23% in the 1000 genomes project. OMIM reports 9 phenotypes associated with variants in the SCN5A gene including Atrial fibrillation (familial) (10), Brugada syndrome 1, Cardiomyopathy (dilated) (1E), Heart block (nonprogressive), Heart block (progressive) (type 1A), Long QT syndrome-3, Sick sinus syndrome 1, Ventricular fibrillation (familial) (1), susceptibility to Sudden infant death syndrome. This variant causes a nonsynonymous conservative amino acid substitution (p.H558R) which may alter protein function. ClinVar classifies this variant as pathogenic and non-pathogenic and reports an association with Progressive familial heart block type 1A, not specified. This variant is predicted to be tolerable by SIFT and benign by PolyPhen2.

#### *c.2326A>G*

The patient is heterozygous for a common missense polymorphism in the DSC2 gene which occurs at a frequency of 0.2% in the 1000 genomes project. OMIM reports 2 phenotypes associated with variants in the DSC2 gene including Arrhythmogenic right ventricular dysplasia 11 with mild palmoplantar keratoderma and woolly hair, Arrhythmogenic right ventricular dysplasia 11. This variant causes a nonsynonymous conservative amino acid substitution (p.I776V) which may alter protein function. ClinVar classifies this variant as non-pathogenic and reports an association with not specified. This variant is predicted to be tolerable by SIFT and benign by PolyPhen2.

#### *c.1853C>T*

The patient is heterozygous for a common missense polymorphism in the APOB gene which occurs at a frequency of 0.48% in the 1000 genomes project. OMIM reports 2 phenotypes associated with variants in the APOB gene including Hypercholesterolemia (due to ligand-defective apo B), Hypobetalipoproteinemia. This variant causes a nonsynonymous moderate amino acid substitution (p.A618V) which may alter protein function. ClinVar classifies this variant as probable-non-pathogenic and reports an association with not specified. This variant is predicted to be tolerable by SIFT and deleterious by PolyPhen2.

#### *c.215C>G*

The patient is heterozygous for a common missense polymorphism in the TP53 gene which occurs at a frequency of 0.54% in the 1000 genomes project. OMIM reports 11 phenotypes associated with variants in the TP53 gene including Adrenal cortical carcinoma, Breast cancer, Choroid plexus papilloma, Colorectal cancer, Hepatocellular carcinoma, Li-Fraumeni syndrome, Nasopharyngeal carcinoma, Osteosarcoma, Pancreatic cancer, Basal cell carcinoma 7, Glioma susceptibility 1. This variant causes a nonsynonymous moderate amino acid substitution (p.P72R) which may alter protein function. ClinVar classifies this variant as non-pathogenic and reports an association with CODON 72 POLYMORPHISM ( ) (rs1042522), , not specified, Neoplastic Syndromes ( Hereditary). This variant is predicted to be tolerable by SIFT and possibly deleterious by PolyPhen2.

#### *c.7397T>C*

The patient is homozygous for a common missense polymorphism in the BRCA2 gene which occurs at a frequency of 0.98% in the 1000 genomes project. OMIM reports 9 phenotypes associated with variants in the BRCA2 gene including Fanconi anemia (complementation group D1), Pancreatic cancer, Prostate cancer, Wilms tumor, susceptibility to Breast cancer (male), Breast-ovarian cancer (familial) (2), Glioblastoma 3, Medulloblastoma, Pre-B-cell acute lymphoblastic leukemia. This variant causes a nonsynonymous moderate amino acid substitution (p.V2466A) which may alter protein function. ClinVar classifies this variant as untested, unknown and non-pathogenic and reports an association with Familial cancer of breast, Breast-ovarian cancer (familial 2), not specified. This variant is predicted to be tolerable by SIFT

#### *c.1014G>C*

The patient is heterozygous for a common missense polymorphism in the MUTYH gene which occurs at a frequency of 0.31% in the 1000 genomes project. OMIM reports 3 phenotypes associated with variants in the MUTYH gene including Adenomas (multiple colorectal), Colorectal adenomatous polyposis (autosomal recessive) (with pilomatricomas), Gastric cancer (somatic). This variant causes a nonsynonymous conservative amino acid substitution (p.Q338H) which may

alter protein function. ClinVar classifies this variant as non-pathogenic and reports an association with , not specified, Neoplastic Syndromes ( Hereditary). This variant is predicted to be tolerable by SIFT and possibly deleterious by PolyPhen2.

#### *c.1636A>G*

The patient is homozygous for a common missense polymorphism in the MEN1 gene which occurs at a frequency of 0.83% in the 1000 genomes project. OMIM reports 6 phenotypes associated with variants in the MEN1 gene including Adrenal adenoma (somatic), Angiofibroma (somatic), Carcinoid tumor of lung, Lipoma (somatic), Multiple endocrine neoplasia 1, Parathyroid adenoma (somatic). This variant causes a nonsynonymous moderate amino acid substitution (p.T546A) which may alter protein function. ClinVar classifies this variant as non-pathogenic and reports an association with , not specified. This variant is predicted to be tolerable by SIFT and benign by PolyPhen2.

#### *c.2318G>A*

The patient is heterozygous for a common missense polymorphism in the DSG2 gene which occurs at a frequency of 0.24% in the 1000 genomes project. OMIM reports 2 phenotypes associated with variants in the DSG2 gene including Arrhythmogenic right ventricular dysplasia 10, Cardiomyopathy (dilated) (1BB). This variant causes a nonsynonymous conservative amino acid substitution (p.R773K) which may alter protein function. ClinVar classifies this variant as non-pathogenic and reports an association with not specified. This variant is predicted to be tolerable by SIFT and benign by PolyPhen2.

#### *c.5465T>A*

The patient is heterozygous for a common missense polymorphism in the APC gene which occurs at a frequency of 0.87% in the 1000 genomes project. OMIM reports 8 phenotypes associated with variants in the APC gene including Adenoma (periampullary) (somatic), Adenomatous polyposis coli, Brain tumor-polyposis syndrome 2, Colorectal cancer (somatic), Desmoid disease (hereditary), Gardner syndrome, Gastric cancer (somatic), Hepatoblastoma (somatic). This variant causes a nonsynonymous severe amino acid substitution (p.V1822D) which may alter protein function. ClinVar classifies this variant as non-pathogenic and other and reports an association with Adenomatous polyposis coli, , not specified, Familial colorectal cancer, Neoplastic Syndromes ( Hereditary). This variant is predicted to be benign by PolyPhen2.

#### *c.1621A>G*

The patient is homozygous for a common missense polymorphism in the PMS2 gene which occurs at a frequency of 0.88% in the 1000 genomes project. OMIM reports 2 phenotypes associated with variants in the PMS2 gene including Colorectal cancer (hereditary nonpolyposis) (type 4), Mismatch repair cancer syndrome. This variant causes a nonsynonymous moderate amino acid substitution (p.K541E) which may alter protein function. ClinVar classifies this variant as non-pathogenic and reports an association with Lynch syndrome. This variant is predicted to be tolerable by SIFT and benign by PolyPhen2.

#### *c.4059T>G*

The patient is homozygous for a common missense polymorphism in the COL3A1 gene which occurs at a frequency of 1.% in the 1000 genomes project. OMIM reports 2 phenotypes associated with variants in the COL3A1 gene including Ehlers-Danlos syndrome (type III), Ehlers-Danlos syndrome (type IV). This variant causes a nonsynonymous conservative amino acid substitution (p.H1353Q) which may alter protein function. This variant is predicted to be tolerable by SIFT and benign by PolyPhen2.

#### *c.1114A>C*

The patient is heterozygous for a common missense polymorphism in the BRCA2 gene which occurs at a frequency of 0.25% in the 1000 genomes project. OMIM reports 9 phenotypes associated with variants in the BRCA2 gene including Fanconi anemia (complementation group D1), Pancreatic cancer, Prostate cancer, Wilms tumor, susceptibility to Breast cancer (male), Breast-

ovarian cancer (familial) (2), Glioblastoma 3, Medulloblastoma, Pre-B-cell acute lymphoblastic leukemia. This variant causes a nonsynonymous moderate amino acid substitution (p.N372H) which may alter protein function. ClinVar classifies this variant as other, non-pathogenic and untested and reports an association with Breast-ovarian cancer (familial 2), , not specified, Neoplastic Syndromes (Hereditary). This variant is predicted to be tolerable by SIFT

#### *c.1486C>G*

The patient is homogeneous for a common missense polymorphism in the MYLK gene which occurs at a frequency of 1.% in the 1000 genomes project. OMIM reports that variants in the MYLK gene are associated with Aortic aneurysm (familial thoracic 7). This variant causes a nonsynonymous conservative amino acid substitution (p.L496V) which may alter protein function. This variant is predicted to be tolerable by SIFT and benign by PolyPhen2.

#### *c.1420G>A*

The patient is homogeneous for a common missense polymorphism in the PCSK9 gene which occurs at a frequency of 0.87% in the 1000 genomes project. OMIM reports 2 phenotypes associated with variants in the PCSK9 gene including Hypercholesterolemia (familial) (3), Low density lipoprotein cholesterol level QTL 1. This variant causes a nonsynonymous conservative amino acid substitution (p.V474I) which may alter protein function. This variant is predicted to be tolerable by SIFT and benign by PolyPhen2.

#### *c.13013G>A*

The patient is homogeneous for a common missense polymorphism in the APOB gene which occurs at a frequency of 0.63% in the 1000 genomes project. OMIM reports 2 phenotypes associated with variants in the APOB gene including Hypercholesterolemia (due to ligand-defective apo B), Hypobetalipoproteinemia. This variant causes a nonsynonymous conservative amino acid substitution (p.S4338N) which may alter protein function. ClinVar classifies this variant as probable-non-pathogenic and reports an association with not specified. This variant is predicted to be tolerable by SIFT and benign by PolyPhen2.

#### *c.2009G>A*

The patient is homogeneous for a common missense polymorphism in the PCSK9 gene which occurs at a frequency of 0.9% in the 1000 genomes project. OMIM reports 2 phenotypes associated with variants in the PCSK9 gene including Hypercholesterolemia (familial) (3), Low density lipoprotein cholesterol level QTL 1. This variant causes a nonsynonymous moderate amino acid substitution (p.G670E) which may alter protein function. ClinVar classifies this variant as non-pathogenic and reports an association with Familial hypercholesterolemia. This variant is predicted to be tolerable by SIFT and benign by PolyPhen2.

## RECOMMENDATIONS

---

Genetic counseling of the family is recommended to discuss the implications of this report.  
[Additional recommendations.]

## METHODS AND LIMITATIONS

---

This report is a sample to be used solely for the purpose of evaluating functionality of the Tute Platform and should not be used in any clinical application.

### Sequencing and Variant Detection

Whole exome sequencing was performed by solution-based hybridization which enriches for coding exons targeting DNA with specific baits. Sequencing was performed using the Illumina HiSeq 2500 to a minimum average exome depth of 90X. Sequencing reads were aligned to the reference genome (hg19) by BWA-MEM and variants were called using FreeBayes.

### Variant Analysis and Report Generation

Reported variants were analyzed using the Tute platform to identify those variants which are reported by medical literature to be pathogenic. All non-synonymous variants of allele frequency <1% reported by the 1000 genomes project and annotated as 'Pathogenic' or 'Probably Pathogenic' by ClinVar are reported in the table 'Primary/Diagnostic Sequence Variant(s) Detected'. Careful correlation of these variants with the clinical indications for the proband should be conducted by an experience medical geneticist to verify that reported findings are consistent with reported clinical phenotypes. Additionally, variants are included based on ACMG guidelines for the reporting of incidental findings in the table 'Secondary/Incidental Sequence Variant(s) Detected'.

### Validation of reported findings

Variants of interest should be confirmed by Sanger sequencing. The DNA immediately flanking each of these variants should be amplified genomic DNA followed by sequencing in both directions using fluorescent dideoxy sequencing.

### Limitations

Absence of a primary diagnostic finding identified by this test does not exclude the possibility of a genetic basis for the clinical condition for this proband. Certain genetic abnormalities are not detectable by the technologies used to generate this report. Specifically, detection of abnormal variants depends on the presence of these sequence variants in the sequencing data. This exome sequence test is designed to evaluate single nucleotide variants within the human exome; however, this technology is only able to sequence 90-95% of the human reference to the requisite 10-fold coverage needed for reliable detection of heterozygous variants.

Additionally, certain types of genetic abnormalities are difficult to identify in sequencing data and have not been validated for clinical use including insertions, deletions, copy number alterations, long repetitive sequences, triplet repeat expansions, chromosomal rearrangements, polyploidy, repetitive regions including mono-, di- and tri-nucleotide repeats, GX rich regions, intronic variants outside the splice-site and epigenetic effects.

Variants believed to be benign based on medical literature, or with population frequencies greater than or equal to 1%, or resulting in synonymous amino acid changes, or occurring in 5' or 3' untranslated regions are generally not reported.

This report is a sample to be used solely for the purpose of evaluating functionality of the Tute Platform and should not be used in any clinical application.

## Sources

---

### REPORT SIGNATURES

---

Online Mendelian Inheritance in Man, OMIM (TM). Retrieved 0/26/2015 from <http://www.ncbi.nlm.nih.gov/omim/>  
ClinVar. Retrieved 0/26/2015 from <http://www.ncbi.nlm.nih.gov/clinvar/>



**ORDERING PROVIDER**

,

**SPECIMEN**

Collection Date:

Received Date:

Report Date:

**PATIENT**

Name:

Date of Birth:

Patient ID:

Gender:

Clinical Indication:

---

[Detailed clinical description.]

**TEST RESULTS SUMMARY**

---

Primary Result(s): [Findings related to clinical indication.]

Incidental/Secondary Result(s): [Incidental findings.]

PRIMARY/DIAGNOSTIC SEQUENCE VARIANT(S) DETECTED

| Gene    | Nucleotide Change | Protein Change | Zygoty | Tute Dx                                                                               |
|---------|-------------------|----------------|--------|---------------------------------------------------------------------------------------|
| HFE     | c.845G>A          | p.C282Y        | hom    | Hereditary hemochromatosis Hemochromatosis, juvenile, digenic                         |
| CFTR    | c.224G>A          | p.R75Q         | het    | Hereditary pancreatitis;Cystic fibrosis                                               |
| MKKS    | c.724G>T          | p.A242S        | het    | McKusick Kaufman syndrome                                                             |
| NTRK1   | c.1810C>T         | p.H604Y        | het    | Familial medullary thyroid carcinoma Hereditary insensitivity to pain with anhidrosis |
| VPS13B  | c.9406-1G>T       | .              | het    | Cohen syndrome                                                                        |
| BRIP1   | c.139C>G          | p.P47A         | het    | Breast cancer, early-onset                                                            |
| F5      | c.1601A>G         | p.Q534R        | het    | Thrombophilia due to factor V Leiden                                                  |
| DPYD    | c.85C>T           | p.R29C         | hom    | Dihydropyrimidine dehydrogenase deficiency;not provided                               |
| PRSS1   | c.86A>T           | p.N29I         | het    | Hereditary pancreatitis;Hereditary pancreatitis                                       |
| FUT2    | c.461G>A          | p.W154X        | hom    | Norwalk virus infection, resistance to                                                |
| SLC6A20 | c.596C>T          | p.T199M        | het    | Hyperglycinuria Iminoglycinuria, digenic                                              |
| PRSS1   | c.47C>T           | p.A16V         | het    | Hereditary pancreatitis                                                               |
| NTRK1   | c.1838G>T         | p.G613V        | het    | Familial medullary thyroid carcinoma Hereditary insensitivity to pain with anhidrosis |
| PRSS1   | c.161A>G          | p.N54S         | het    | Hereditary pancreatitis                                                               |
| FGFR4   | c.1162G>A         | p.G388R        | het    | Cancer progression and tumor cell motility                                            |
| ITGB3   | c.176T>C          | p.L59P         | het    | Thrombocytopenia, neonatal alloimmune Posttransfusion purpura                         |
| TIRAP   | c.539C>T          | p.S180L        | het    | Malaria, resistance to BACTEREMIA, RESISTANCE TO                                      |
| CST3    | c.73G>A           | p.A25T         | het    | Age-related macular degeneration 11                                                   |
| HEXB    | c.185T>C          | p.L62S         | hom    | Sandhoff disease, infantile type                                                      |
| BBS2    | c.209G>A          | p.S70N         | hom    | Bardet-Biedl syndrome 2                                                               |

## SECONDARY/INCIDENTAL SEQUENCE VARIANT(S) DETECTED

The American College of Medical Genetics and Genomics (ACMG) recently published a policy statement on clinical sequencing that emphasizes the possibility of recognizing and reporting incidental or secondary findings of medical value when conducting exome and genome sequencing. The ACMG recommends that laboratories performing clinical sequencing seek and report mutations of specified classes or types in the genes listed within the guidelines. This section of the report describes variants which fit the criteria outlined by ACMG for the reporting of incidental or secondary findings.

| Gene   | Nucleotide Change | Protein Change | Zygoty | Tute Dx                          |
|--------|-------------------|----------------|--------|----------------------------------|
| MUTYH  | c.1276C>T         | p.R426C        | het    | Adenomatous polyposis coli       |
| PMS2   | c.59G>A           | p.R20Q         | het    | Colorectal cancer, non-polyposis |
| BRCA1  | c.1067A>G         | p.Q356R        | het    | .                                |
| SDHD   | c.371A>G          | p.Q124R        | hom    | .                                |
| FBN1   | c.1415G>A         | p.C472Y        | hom    | .                                |
| BRCA2  | c.7397T>C         | p.V2466A       | hom    | Breast cancer                    |
| MUTYH  | c.1014G>C         | p.Q338H        | het    | .                                |
| MEN1   | c.1636A>G         | p.T546A        | hom    | .                                |
| DSG2   | c.2318G>A         | p.R773K        | het    | .                                |
| APC    | c.5465T>A         | p.V1822D       | hom    | .                                |
| PMS2   | c.1621A>G         | p.K541E        | hom    | Colorectal cancer, non-polyposis |
| COL3A1 | c.4059T>G         | p.H1353Q       | hom    | .                                |
| BRCA2  | c.1114A>C         | p.N372H        | het    | .                                |
| MYLK   | c.1486C>G         | p.L496V        | hom    | .                                |
| PCSK9  | c.1420G>A         | p.V474I        | hom    | .                                |
| APOB   | c.13013G>A        | p.S4338N       | hom    | .                                |
| PCSK9  | c.2009G>A         | p.G670E        | hom    | .                                |
| DSC2   | c.2393G>A         | p.R798Q        | het    | .                                |
| APOB   | c.6937A>G         | p.I2313V       | hom    | .                                |
| MYLK   | c.439C>T          | p.P147S        | hom    | .                                |

## INTERPRETATION OF PRIMARY FINDINGS

### c.845G>A

The patient is homogeneous for a common missense polymorphism in the HFE gene which occurs at a frequency of 0.013% in the 1000 genomes project. OMIM reports 6 phenotypes associated with variants in the HFE gene including Hemochromatosis, [Transferrin serum level QTL2], susceptibility to Alzheimer disease, Microvascular complications of diabetes 7, susceptibility to Porphyria cutanea tarda, susceptibility to Porphyria variegata. This variant causes a nonsynonymous severe amino acid substitution (p.C282Y) which may alter protein function. ClinVar classifies this variant as

acid substitution (p.G2021) which may alter protein function. ClinVar classifies this variant as pathogenic, other and non-pathogenic and reports an association with Hereditary hemochromatosis, Porphyria cutanea tarda (susceptibility to), Porphyria variegata (susceptibility to), Hemochromatosis (juvenile) (digenic), Alzheimer disease (susceptibility to), Transferrin serum level quantitative trait locus 2, Microvascular complications of diabetes 7, not specified. This variant is predicted to be deleterious by SIFT and deleterious by PolyPhen2.

#### *c.224G>A*

The patient is heterozygous for a common missense polymorphism in the CFTR gene which occurs at a frequency of 0.0064% in the 1000 genomes project. OMIM reports 6 phenotypes associated with variants in the CFTR gene including Congenital bilateral absence of vas deferens, Cystic fibrosis, Sweat chloride elevation without CF, modifier of Bronchiectasis with or without elevated sweat chloride 1, Hypertrypsinemia (neonatal), Pancreatitis (idiopathic). This variant causes a nonsynonymous conservative amino acid substitution (p.R75Q) which may alter protein function. ClinVar classifies this variant as probable-non-pathogenic, unknown, non-pathogenic and pathogenic and reports an association with Cystic fibrosis, , not specified, Hereditary pancreatitis;Cystic fibrosis. This variant is predicted to be deleterious by SIFT and deleterious by PolyPhen2.

#### *c.724G>T*

The patient is heterozygous for a rare missense mutation in the MKKS gene which occurs at a frequency of 0.0018% in the 1000 genomes project. OMIM reports 2 phenotypes associated with variants in the MKKS gene including Bardet-Biedl syndrome 6, McKusick-Kaufman syndrome. This variant causes a nonsynonymous moderate amino acid substitution (p.A242S) which may alter protein function. ClinVar classifies this variant as pathogenic and reports an association with McKusick Kaufman syndrome. This variant is predicted to be tolerable by SIFT and deleterious by PolyPhen2.

#### *c.1810C>T*

The patient is heterozygous for a common missense polymorphism in the NTRK1 gene which occurs at a frequency of 0.024% in the 1000 genomes project. OMIM reports 2 phenotypes associated with variants in the NTRK1 gene including Insensitivity to pain (congenital) (with anhidrosis), Medullary thyroid carcinoma (familial). This variant causes a nonsynonymous moderate amino acid substitution (p.H604Y) which may alter protein function. ClinVar classifies this variant as pathogenic and non-pathogenic and reports an association with Familial medullary thyroid carcinoma, Hereditary insensitivity to pain with anhidrosis, Hereditary insensitivity to pain with anhidrosis. This variant is predicted to be deleterious by SIFT and deleterious by PolyPhen2.

#### *c.9406-1G>T*

The patient is heterozygous for a common polymorphism in the VPS13B gene which doesn't occur in the 1000 genomes project. OMIM reports that variants in the VPS13B gene are associated with Cohen syndrome. ClinVar classifies this variant as probable-pathogenic and reports an association with Cohen syndrome.

#### *c.139C>G*

The patient is heterozygous for a rare missense mutation in the BRIP1 gene which doesn't occur in the 1000 genomes project. OMIM reports 2 phenotypes associated with variants in the BRIP1 gene including Breast cancer (early-onset), Fanconi anemia (complementation group J). This variant causes a nonsynonymous conservative amino acid substitution (p.P47A) which may alter protein function. ClinVar classifies this variant as pathogenic and other and reports an association with Breast cancer (early-onset), Neoplastic Syndromes (Hereditary). This variant is predicted to be deleterious by PolyPhen2.

#### *c.1601A>G*

The patient is heterozygous for a common missense polymorphism in the F5 gene which occurs at a frequency of 0.99% in the 1000 genomes project. OMIM reports 6 phenotypes associated with variants in the F5 gene including Factor V deficiency, Thrombophilia due to activated protein C resistance, Budd-Chiari syndrome, susceptibility to Pregnancy loss recurrent 1, susceptibility to

Stroke (ischemic), susceptibility to Thrombophilia due to factor V Leiden. This variant causes a nonsynonymous conservative amino acid substitution (p.Q534R) which may alter protein function. ClinVar classifies this variant as pathogenic, untested and other and reports an association with Thrombophilia due to factor V Leiden, Ischemic stroke (susceptibility to), Budd-Chiari syndrome (susceptibility to), Recurrent abortion. This variant is predicted to be tolerable by SIFT

#### *c.85C>T*

The patient is homozygous for a common missense polymorphism in the DPYD gene which occurs at a frequency of 0.74% in the 1000 genomes project. OMIM reports 2 phenotypes associated with variants in the DPYD gene including 5-fluorouracil toxicity, Dihydropyrimidine dehydrogenase deficiency. This variant causes a nonsynonymous severe amino acid substitution (p.R29C) which may alter protein function. ClinVar classifies this variant as pathogenic and reports an association with Dihydropyrimidine dehydrogenase deficiency;. This variant is predicted to be tolerable by SIFT and deleterious by PolyPhen2.

#### *c.86A>T*

The patient is heterozygous for a common missense polymorphism in the PRSS1 gene which doesn't occur in the 1000 genomes project. OMIM reports 2 phenotypes associated with variants in the PRSS1 gene including Pancreatitis (hereditary), Trypsinogen deficiency. This variant causes a nonsynonymous moderate amino acid substitution (p.N29I) which may alter protein function. ClinVar classifies this variant as pathogenic and reports an association with Hereditary pancreatitis;Hereditary pancreatitis. This variant is predicted to be deleterious by SIFT and benign by PolyPhen2.

#### *c.461G>A*

The patient is homozygous for a common nonsense polymorphism in the FUT2 gene which occurs at a frequency of 0.32% in the 1000 genomes project. OMIM reports 3 phenotypes associated with variants in the FUT2 gene including [Bombay phenotype], resistance to Norwalk virus infection, Vitamin B12 plasma level QTL1. This variant introduces a premature stop codon which may lead to early termination of protein transcription. ClinVar classifies this variant as non-pathogenic, pathogenic and other and reports an association with SECRETOR/NONSECRETOR POLYMORPHISM, Norwalk virus infection (resistance to), Vitamin b12 plasma level quantitative trait locus 1. This variant is predicted to be tolerable by SIFT

#### *c.596C>T*

The patient is heterozygous for a common missense polymorphism in the SLC6A20 gene which occurs at a frequency of 0.033% in the 1000 genomes project. OMIM reports 2 phenotypes associated with variants in the SLC6A20 gene including Hyperglycinuria, Iminoglycinuria (digenic). This variant causes a nonsynonymous moderate amino acid substitution (p.T199M) which may alter protein function. ClinVar classifies this variant as pathogenic and reports an association with Hyperglycinuria, Iminoglycinuria (digenic). This variant is predicted to be deleterious by SIFT and deleterious by PolyPhen2.

#### *c.47C>T*

The patient is heterozygous for a common missense polymorphism in the PRSS1 gene which doesn't occur in the 1000 genomes project. OMIM reports 2 phenotypes associated with variants in the PRSS1 gene including Pancreatitis (hereditary), Trypsinogen deficiency. This variant causes a nonsynonymous moderate amino acid substitution (p.A16V) which may alter protein function. ClinVar classifies this variant as pathogenic and reports an association with Hereditary pancreatitis. This variant is predicted to be tolerable by SIFT and benign by PolyPhen2.

#### *c.1838G>T*

The patient is heterozygous for a common missense polymorphism in the NTRK1 gene which occurs at a frequency of 0.023% in the 1000 genomes project. OMIM reports 2 phenotypes associated with variants in the NTRK1 gene including Insensitivity to pain (congenital) (with anhidrosis), Medullary thyroid carcinoma (familial). This variant causes a nonsynonymous moderate

amino acid substitution (p.G613V) which may alter protein function. ClinVar classifies this variant as pathogenic and non-pathogenic and reports an association with Familial medullary thyroid carcinoma, Hereditary insensitivity to pain with anhidrosis, Hereditary insensitivity to pain with anhidrosis. This variant is predicted to be tolerable by SIFT and possibly deleterious by PolyPhen2.

#### *c.161A>G*

The patient is heterozygous for a common missense polymorphism in the PRSS1 gene which doesn't occur in the 1000 genomes project. OMIM reports 2 phenotypes associated with variants in the PRSS1 gene including Pancreatitis (hereditary), Trypsinogen deficiency. This variant causes a nonsynonymous conservative amino acid substitution (p.N54S) which may alter protein function. ClinVar classifies this variant as pathogenic and reports an association with Hereditary pancreatitis. This variant is predicted to be tolerable by SIFT and benign by PolyPhen2.

#### *c.1162G>A*

The patient is heterozygous for a common missense polymorphism in the FGFR4 gene which occurs at a frequency of 0.3% in the 1000 genomes project. OMIM reports that variants in the FGFR4 gene are associated with Cancer progression/metastasis. This variant causes a nonsynonymous moderate amino acid substitution (p.G388R) which may alter protein function. ClinVar classifies this variant as pathogenic and reports an association with Cancer progression and tumor cell motility. This variant is predicted to be deleterious by SIFT and deleterious by PolyPhen2.

#### *c.176T>C*

The patient is heterozygous for a common missense polymorphism in the ITGB3 gene which occurs at a frequency of 0.089% in the 1000 genomes project. OMIM reports 5 phenotypes associated with variants in the ITGB3 gene including Bleeding disorder (platelet-type) (16) (autosomal dominant), Glanzmann thrombasthenia, Purpura (posttransfusion), Thrombocytopenia (neonatal alloimmune), susceptibility to Myocardial infarction. This variant causes a nonsynonymous moderate amino acid substitution (p.L59P) which may alter protein function. ClinVar classifies this variant as non-pathogenic, pathogenic and other and reports an association with PL(A1)/(A2) ALLOANTIGEN POLYMORPHISM, Thrombocytopenia (neonatal alloimmune), Posttransfusion purpura, Myocardial infarction, Fracture (hip) (susceptibility to). This variant is predicted to be tolerable by SIFT and benign by PolyPhen2.

#### *c.539C>T*

The patient is heterozygous for a common missense polymorphism in the TIRAP gene which occurs at a frequency of 0.086% in the 1000 genomes project. OMIM reports 4 phenotypes associated with variants in the TIRAP gene including protection against Bacteremia, protection against Malaria, protection against Pneumococcal disease (invasive), protection against Tuberculosis. This variant causes a nonsynonymous moderate amino acid substitution (p.S180L) which may alter protein function. ClinVar classifies this variant as other and pathogenic and reports an association with Invasive pneumococcal disease (protection against), Malaria (resistance to), Mycobacterium tuberculosis (protection against), BACTEREMIA (RESISTANCE TO). This variant is predicted to be possibly deleterious by PolyPhen2.

#### *c.73G>A*

The patient is heterozygous for a common missense polymorphism in the CST3 gene which occurs at a frequency of 0.21% in the 1000 genomes project. OMIM reports 2 phenotypes associated with variants in the CST3 gene including Cerebral amyloid angiopathy, Macular degeneration (age-related) (11). This variant causes a nonsynonymous moderate amino acid substitution (p.A25T) which may alter protein function. ClinVar classifies this variant as pathogenic and reports an association with Age-related macular degeneration 11. This variant is predicted to be tolerable by SIFT and benign by PolyPhen2.

#### *c.185T>C*

The patient is homozygous for a common missense polymorphism in the HEXB gene which occurs at a frequency of 0.98% in the 1000 genomes project. OMIM reports that variants in the HEXB gene are associated with Sandhoff disease (infantile) (juvenile) (and adult forms). This variant

FLAD gene are associated with Sandhoff disease (infantile) (juvenile) (and adult forms). This variant causes a nonsynonymous moderate amino acid substitution (p.L62S) which may alter protein function. ClinVar classifies this variant as pathogenic and reports an association with Sandhoff disease ( infantile type). This variant is predicted to be tolerable by SIFT

#### *c.209G>A*

The patient is homozygous for a common missense polymorphism in the BBS2 gene which occurs at a frequency of 1.% in the 1000 genomes project. OMIM reports that variants in the BBS2 gene are associated with Bardet-Biedl syndrome 2. This variant causes a nonsynonymous conservative amino acid substitution (p.S70N) which may alter protein function. ClinVar classifies this variant as pathogenic and reports an association with Bardet-Biedl syndrome 2. This variant is predicted to be tolerable by SIFT

## INTERPRETATION OF SECONDARY FINDINGS

---

#### *c.1276C>T*

The patient is heterozygous for a rare missense mutation in the MUTYH gene which doesn't occur in the 1000 genomes project. OMIM reports 3 phenotypes associated with variants in the MUTYH gene including Adenomas (multiple colorectal), Colorectal adenomatous polyposis (autosomal recessive) (with pilomatricomas), Gastric cancer (somatic). This variant causes a nonsynonymous severe amino acid substitution (p.R426C) which may alter protein function. ClinVar classifies this variant as unknown and other and reports an association with , Neoplastic Syndromes ( Hereditary), MYH-associated polyposis. Invitae classifies this variant as Variant of uncertain significance. This variant is predicted to be tolerable by SIFT and deleterious by PolyPhen2.

#### *c.59G>A*

The patient is heterozygous for a common missense polymorphism in the PMS2 gene which occurs at a frequency of 0.076% in the 1000 genomes project. OMIM reports 2 phenotypes associated with variants in the PMS2 gene including Colorectal cancer (hereditary nonpolyposis) (type 4), Mismatch repair cancer syndrome. This variant causes a nonsynonymous conservative amino acid substitution (p.R20Q) which may alter protein function. ClinVar classifies this variant as non-pathogenic and untested and reports an association with , Lynch syndrome, not specified, Neoplastic Syndromes ( Hereditary). This variant is predicted to be tolerable by SIFT and possibly deleterious by PolyPhen2.

#### *c.1067A>G*

The patient is heterozygous for a common missense polymorphism in the BRCA1 gene which occurs at a frequency of 0.022% in the 1000 genomes project. OMIM reports 2 phenotypes associated with variants in the BRCA1 gene including Breast-ovarian cancer (familial) (1), susceptibility to Pancreatic cancer 4. This variant causes a nonsynonymous conservative amino acid substitution (p.Q356R) which may alter protein function. ClinVar classifies this variant as non-pathogenic, other and untested and reports an association with , BRCA1 and BRCA2 Hereditary Breast and Ovarian Cancer, Breast-ovarian cancer ( familial 1), not specified, Neoplastic Syndromes ( Hereditary). ARUP classifies this variant as 1 - Not pathogenic or of no clinical significance. Invitae classifies this variant as Benign. This variant is predicted to be deleterious by SIFT and deleterious by PolyPhen2.

#### *c.371A>G*

The patient is homozygous for a common missense polymorphism in the SDHD gene which occurs at a frequency of 0.95% in the 1000 genomes project. OMIM reports 6 phenotypes associated with variants in the SDHD gene including Carcinoid tumors (intestinal), Cowden syndrome 3, Merkel cell carcinoma (somatic), Paraganglioma and gastric stromal sarcoma, Paragangliomas 1 (with or without deafness), Pheochromocytoma. This variant causes a nonsynonymous conservative amino acid substitution (p.Q124R) which may alter protein function. This variant is predicted to be tolerable by SIFT

predicted to be tolerable by SIFT

#### *c.1415G>A*

The patient is homogeneous for a common missense polymorphism in the FBN1 gene which occurs at a frequency of 1.0% in the 1000 genomes project. OMIM reports 8 phenotypes associated with variants in the FBN1 gene including Acromioclavicular dysplasia, Aortic aneurysm (ascending) (and dissection), Ectopia lentis (familial), Geleophysic dysplasia 2, MASS syndrome, Marfan syndrome, Stiff skin syndrome, Weill-Marchesani syndrome 2 (dominant). This variant causes a nonsynonymous severe amino acid substitution (p.C472Y) which may alter protein function. This variant is predicted to be tolerable by SIFT and benign by PolyPhen2.

#### *c.7397T>C*

The patient is homogeneous for a common missense polymorphism in the BRCA2 gene which occurs at a frequency of 0.98% in the 1000 genomes project. OMIM reports 9 phenotypes associated with variants in the BRCA2 gene including Fanconi anemia (complementation group D1), Pancreatic cancer, Prostate cancer, Wilms tumor, susceptibility to Breast cancer (male), Breast-ovarian cancer (familial) (2), Glioblastoma 3, Medulloblastoma, Pre-B-cell acute lymphoblastic leukemia. This variant causes a nonsynonymous moderate amino acid substitution (p.V2466A) which may alter protein function. ClinVar classifies this variant as untested, unknown and non-pathogenic and reports an association with Familial cancer of breast, Breast-ovarian cancer (familial 2), not specified. This variant is predicted to be tolerable by SIFT

#### *c.1014G>C*

The patient is heterozygous for a common missense polymorphism in the MUTYH gene which occurs at a frequency of 0.31% in the 1000 genomes project. OMIM reports 3 phenotypes associated with variants in the MUTYH gene including Adenomas (multiple colorectal), Colorectal adenomatous polyposis (autosomal recessive) (with pilomatricomas), Gastric cancer (somatic). This variant causes a nonsynonymous conservative amino acid substitution (p.Q338H) which may alter protein function. ClinVar classifies this variant as non-pathogenic and reports an association with , not specified, Neoplastic Syndromes ( Hereditary). This variant is predicted to be tolerable by SIFT and possibly deleterious by PolyPhen2.

#### *c.1636A>G*

The patient is homogeneous for a common missense polymorphism in the MEN1 gene which occurs at a frequency of 0.83% in the 1000 genomes project. OMIM reports 6 phenotypes associated with variants in the MEN1 gene including Adrenal adenoma (somatic), Angiofibroma (somatic), Carcinoid tumor of lung, Lipoma (somatic), Multiple endocrine neoplasia 1, Parathyroid adenoma (somatic). This variant causes a nonsynonymous moderate amino acid substitution (p.T546A) which may alter protein function. ClinVar classifies this variant as non-pathogenic and reports an association with , not specified. This variant is predicted to be tolerable by SIFT and benign by PolyPhen2.

#### *c.2318G>A*

The patient is heterozygous for a common missense polymorphism in the DSG2 gene which occurs at a frequency of 0.24% in the 1000 genomes project. OMIM reports 2 phenotypes associated with variants in the DSG2 gene including Arrhythmogenic right ventricular dysplasia 10, Cardiomyopathy (dilated) (1BB). This variant causes a nonsynonymous conservative amino acid substitution (p.R773K) which may alter protein function. ClinVar classifies this variant as non-pathogenic and reports an association with not specified. This variant is predicted to be tolerable by SIFT and benign by PolyPhen2.

#### *c.5465T>A*

The patient is homogeneous for a common missense polymorphism in the APC gene which occurs at a frequency of 0.87% in the 1000 genomes project. OMIM reports 8 phenotypes associated with variants in the APC gene including Adenoma (periampullary) (somatic), Adenomatous polyposis coli, Brain tumor-polyposis syndrome 2, Colorectal cancer (somatic), Desmoid disease (hereditary), Gardner syndrome, Gastric cancer (somatic), Hepatoblastoma (somatic). This variant causes a



Gardner syndrome, Gastric cancer (somatic), Hepatoblastoma (somatic). This variant causes a nonsynonymous severe amino acid substitution (p.V1822D) which may alter protein function. ClinVar classifies this variant as non-pathogenic and other and reports an association with Adenomatous polyposis coli, , not specified, Familial colorectal cancer, Neoplastic Syndromes ( Hereditary). This variant is predicted to be benign by PolyPhen2.

#### *c.1621A>G*

The patient is homogeneous for a common missense polymorphism in the PMS2 gene which occurs at a frequency of 0.88% in the 1000 genomes project. OMIM reports 2 phenotypes associated with variants in the PMS2 gene including Colorectal cancer (hereditary nonpolyposis) (type 4), Mismatch repair cancer syndrome. This variant causes a nonsynonymous moderate amino acid substitution (p.K541E) which may alter protein function. ClinVar classifies this variant as non-pathogenic and reports an association with Lynch syndrome. This variant is predicted to be tolerable by SIFT and benign by PolyPhen2.

#### *c.4059T>G*

The patient is homogeneous for a common missense polymorphism in the COL3A1 gene which occurs at a frequency of 1.% in the 1000 genomes project. OMIM reports 2 phenotypes associated with variants in the COL3A1 gene including Ehlers-Danlos syndrome (type III), Ehlers-Danlos syndrome (type IV). This variant causes a nonsynonymous conservative amino acid substitution (p.H1353Q) which may alter protein function. This variant is predicted to be tolerable by SIFT and benign by PolyPhen2.

#### *c.1114A>C*

The patient is heterozygous for a common missense polymorphism in the BRCA2 gene which occurs at a frequency of 0.25% in the 1000 genomes project. OMIM reports 9 phenotypes associated with variants in the BRCA2 gene including Fanconi anemia (complementation group D1), Pancreatic cancer, Prostate cancer, Wilms tumor, susceptibility to Breast cancer (male), Breast-ovarian cancer (familial) (2), Glioblastoma 3, Medulloblastoma, Pre-B-cell acute lymphoblastic leukemia. This variant causes a nonsynonymous moderate amino acid substitution (p.N372H) which may alter protein function. ClinVar classifies this variant as other, non-pathogenic and untested and reports an association with Breast-ovarian cancer ( familial 2), , not specified, Neoplastic Syndromes ( Hereditary). This variant is predicted to be tolerable by SIFT

#### *c.1486C>G*

The patient is homogeneous for a common missense polymorphism in the MYLK gene which occurs at a frequency of 1.% in the 1000 genomes project. OMIM reports that variants in the MYLK gene are associated with Aortic aneurysm (familial thoracic 7). This variant causes a nonsynonymous conservative amino acid substitution (p.L496V) which may alter protein function. This variant is predicted to be tolerable by SIFT and benign by PolyPhen2.

#### *c.1420G>A*

The patient is homogeneous for a common missense polymorphism in the PCSK9 gene which occurs at a frequency of 0.87% in the 1000 genomes project. OMIM reports 2 phenotypes associated with variants in the PCSK9 gene including Hypercholesterolemia (familial) (3), Low density lipoprotein cholesterol level QTL 1. This variant causes a nonsynonymous conservative amino acid substitution (p.V474I) which may alter protein function. This variant is predicted to be tolerable by SIFT and benign by PolyPhen2.

#### *c.13013G>A*

The patient is homogeneous for a common missense polymorphism in the APOB gene which occurs at a frequency of 0.63% in the 1000 genomes project. OMIM reports 2 phenotypes associated with variants in the APOB gene including Hypercholesterolemia (due to ligand-defective apo B), Hypobetalipoproteinemia. This variant causes a nonsynonymous conservative amino acid substitution (p.S4338N) which may alter protein function. ClinVar classifies this variant as probable-non-pathogenic and reports an association with not specified. This variant is predicted to be tolerable by SIFT and benign by PolyPhen2.

#### *c.2009G>A*

The patient is homozygous for a common missense polymorphism in the PCSK9 gene which occurs at a frequency of 0.9% in the 1000 genomes project. OMIM reports 2 phenotypes associated with variants in the PCSK9 gene including Hypercholesterolemia (familial) (3), Low density lipoprotein cholesterol level QTL 1. This variant causes a nonsynonymous moderate amino acid substitution (p.G670E) which may alter protein function. ClinVar classifies this variant as non-pathogenic and reports an association with Familial hypercholesterolemia. This variant is predicted to be tolerable by SIFT and benign by PolyPhen2.

#### *c.2393G>A*

The patient is heterozygous for a common missense polymorphism in the DSC2 gene which occurs at a frequency of 0.028% in the 1000 genomes project. OMIM reports 2 phenotypes associated with variants in the DSC2 gene including Arrhythmogenic right ventricular dysplasia 11 with mild palmoplantar keratoderma and woolly hair, Arrhythmogenic right ventricular dysplasia 11. This variant causes a nonsynonymous conservative amino acid substitution (p.R798Q) which may alter protein function. ClinVar classifies this variant as unknown and reports an association with not specified; Arrhythmogenic right ventricular cardiomyopathy, not specified. This variant is predicted to be tolerable by SIFT and benign by PolyPhen2.

#### *c.6937A>G*

The patient is homozygous for a common missense polymorphism in the APOB gene which occurs at a frequency of 0.99% in the 1000 genomes project. OMIM reports 2 phenotypes associated with variants in the APOB gene including Hypercholesterolemia (due to ligand-defective apo B), Hypobetalipoproteinemia. This variant causes a nonsynonymous conservative amino acid substitution (p.I2313V) which may alter protein function. This variant is predicted to be tolerable by SIFT and benign by PolyPhen2.

#### *c.439C>T*

The patient is homozygous for a common missense polymorphism in the MYLK gene which occurs at a frequency of 0.86% in the 1000 genomes project. OMIM reports that variants in the MYLK gene are associated with Aortic aneurysm (familial thoracic 7). This variant causes a nonsynonymous moderate amino acid substitution (p.P147S) which may alter protein function. This variant is predicted to be tolerable by SIFT and benign by PolyPhen2.

## RECOMMENDATIONS

---

Genetic counseling of the family is recommended to discuss the implications of this report.  
[Additional recommendations.]

## METHODS AND LIMITATIONS

---

This report is a sample to be used solely for the purpose of evaluating functionality of the Tute Platform and should not be used in any clinical application.

### Sequencing and Variant Detection

Whole exome sequencing was performed by solution-based hybridization which enriches for coding exons targeting DNA with specific baits. Sequencing was performed using the Illumina HiSeq 2500 to a minimum average exome depth of 90X. Sequencing reads were aligned to the reference genome (hg19) by BWA-MEM and variants were called using FreeBayes.

### Variant Analysis and Report Generation

Reported variants were analyzed using the Tute platform to identify those variants which are reported by medical literature to be pathogenic. All non-synonymous variants of allele frequency <1% reported by the 1000 genomes project and annotated as 'Pathogenic' or 'Probably Pathogenic' by ClinVar are reported in the table 'Primary/Diagnostic Sequence Variant(s) Detected'. Careful correlation of these variants with the clinical indications for the proband should be conducted by an experience medical geneticist to verify that reported findings are consistent with reported clinical phenotypes. Additionally, variants are included based on ACMG guidelines for the reporting of incidental findings in the table 'Secondary/Incidental Sequence Variant(s) Detected'.

### Validation of reported findings

Variants of interest should be confirmed by Sanger sequencing. The DNA immediately flanking each of these variants should be amplified genomic DNA followed by sequencing in both directions using fluorescent dideoxy sequencing.

### Limitations

Absence of a primary diagnostic finding identified by this test does not exclude the possibility of a genetic basis for the clinical condition for this proband. Certain genetic abnormalities are not detectable by the technologies used to generate this report. Specifically, detection of abnormal variants depends on the presence of these sequence variants in the sequencing data. This exome sequence test is designed to evaluate single nucleotide variants within the human exome; however, this technology is only able to sequence 90-95% of the human reference to the requisite 10-fold coverage needed for reliable detection of heterozygous variants.

Additionally, certain types of genetic abnormalities are difficult to identify in sequencing data and have not been validated for clinical use including insertions, deletions, copy number alterations, long repetitive sequences, triplet repeat expansions, chromosomal rearrangements, polyploidy, repetitive regions including mono-, di- and tri-nucleotide repeats, GX rich regions, intronic variants outside the splice-site and epigenetic effects.

Variants believed to be benign based on medical literature, or with population frequencies greater than or equal to 1%, or resulting in synonymous amino acid changes, or occurring in 5' or 3' untranslated regions are generally not reported.

This report is a sample to be used solely for the purpose of evaluating functionality of the Tute Platform and should not be used in any clinical application.

## Sources

---

### REPORT SIGNATURES

---

Online Mendelian Inheritance in Man, OMIM (TM). Retrieved 0/26/2015 from <http://www.ncbi.nlm.nih.gov/omim/>  
ClinVar. Retrieved 0/26/2015 from <http://www.ncbi.nlm.nih.gov/clinvar/>

**ORDERING PROVIDER**

,

**SPECIMEN**

Collection Date:

Received Date:

Report Date:

**PATIENT**

Name:

Date of Birth:

Patient ID:

Gender:

Clinical Indication:

---

[Detailed clinical description.]

**TEST RESULTS SUMMARY**

---

Primary Result(s): [Findings related to clinical indication.]

Incidental/Secondary Result(s): [Incidental findings.]

PRIMARY/DIAGNOSTIC SEQUENCE VARIANT(S) DETECTED

| Gene    | Nucleotide Change | Protein Change | Zygoty | Tute Dx                                                                               |
|---------|-------------------|----------------|--------|---------------------------------------------------------------------------------------|
| HFE     | c.845G>A          | p.C282Y        | het    | Hereditary hemochromatosis Hemochromatosis, juvenile, digenic                         |
| LYST    | c.2413delG        | p.E805fs       | het    | Chédiak-Higashi syndrome                                                              |
| NTRK1   | c.1810C>T         | p.H604Y        | het    | Familial medullary thyroid carcinoma Hereditary insensitivity to pain with anhidrosis |
| VPS13B  | c.9406-1G>T       | .              | het    | Cohen syndrome                                                                        |
| BRIP1   | c.139C>G          | p.P47A         | het    | Breast cancer, early-onset                                                            |
| F5      | c.1601A>G         | p.Q534R        | hom    | Thrombophilia due to factor V Leiden                                                  |
| DPYD    | c.85C>T           | p.R29C         | hom    | Dihydropyrimidine dehydrogenase deficiency,not provided                               |
| DCLRE1C | c.97G>A           | p.G33R         | het    | Severe combined immunodeficiency disease                                              |
| PRSS1   | c.86A>T           | p.N29I         | het    | Hereditary pancreatitis;Hereditary pancreatitis                                       |
| FUT2    | c.461G>A          | p.W154X        | het    | Norwalk virus infection, resistance to                                                |
| NTRK1   | c.1838G>T         | p.G613V        | het    | Familial medullary thyroid carcinoma Hereditary insensitivity to pain with anhidrosis |
| PRSS1   | c.161A>G          | p.N54S         | het    | Hereditary pancreatitis                                                               |
| ELAC2   | c.1621G>A         | p.A541T        | het    | Prostate cancer, hereditary, 2                                                        |
| OCA2    | c.913C>T          | p.R305W        | het    | Skin/hair/eye pigmentation, variation in, 1                                           |
| CYP2B6  | c.785A>G          | p.K262R        | het    | Efavirenz, poor metabolism of                                                         |
| ITGB3   | c.176T>C          | p.L59P         | hom    | Thrombocytopenia, neonatal alloimmune Posttransfusion purpura                         |
| TIRAP   | c.539C>T          | p.S180L        | het    | Malaria, resistance to BACTEREMIA, RESISTANCE TO                                      |
| CST3    | c.73G>A           | p.A25T         | het    | Age-related macular degeneration 11                                                   |
| HEXB    | c.185T>C          | p.L62S         | hom    | Sandhoff disease, infantile type                                                      |
| BBS2    | c.209G>A          | p.S70N         | hom    | Bardet-Biedl syndrome 2                                                               |

## SECONDARY/INCIDENTAL SEQUENCE VARIANT(S) DETECTED

The American College of Medical Genetics and Genomics (ACMG) recently published a policy statement on clinical sequencing that emphasizes the possibility of recognizing and reporting incidental or secondary findings of medical value when conducting exome and genome sequencing. The ACMG recommends that laboratories performing clinical sequencing seek and report mutations of specified classes or types in the genes listed within the guidelines. This section of the report describes variants which fit the criteria outlined by ACMG for the reporting of incidental or secondary findings.

| Gene   | Nucleotide Change | Protein Change | Zygosity | Tute Dx                                  |
|--------|-------------------|----------------|----------|------------------------------------------|
| RYR1   | c.7336G>T         | p.G2446C       | het      | .                                        |
| PMS2   | c.59G>A           | p.R20Q         | het      | Colorectal cancer, non-polyposis         |
| PMS2   | c.1531A>G         | p.T511A        | het      | .                                        |
| SDHD   | c.371A>G          | p.Q124R        | hom      | .                                        |
| FBN1   | c.1415G>A         | p.C472Y        | hom      | .                                        |
| SCN5A  | c.1673A>G         | p.H558R        | het      | Progressive familial heart block type 1A |
| DSC2   | c.2326A>G         | p.I776V        | het      | .                                        |
| TP53   | c.215C>G          | p.P72R         | het      | .                                        |
| BRCA2  | c.7397T>C         | p.V2466A       | hom      | Breast cancer                            |
| MUTYH  | c.1014G>C         | p.Q338H        | het      | .                                        |
| MEN1   | c.1636A>G         | p.T546A        | hom      | .                                        |
| DSG2   | c.2318G>A         | p.R773K        | hom      | .                                        |
| APC    | c.5465T>A         | p.V1822D       | hom      | .                                        |
| PMS2   | c.1621A>G         | p.K541E        | hom      | Colorectal cancer, non-polyposis         |
| COL3A1 | c.4059T>G         | p.H1353Q       | hom      | .                                        |
| BRCA2  | c.1114A>C         | p.N372H        | het      | .                                        |
| MYLK   | c.1486C>G         | p.L496V        | hom      | .                                        |
| PCSK9  | c.1420G>A         | p.V474I        | hom      | .                                        |
| APOB   | c.13013G>A        | p.S4338N       | hom      | .                                        |
| PCSK9  | c.2009G>A         | p.G670E        | hom      | .                                        |

## INTERPRETATION OF PRIMARY FINDINGS

### *c.845G>A*

The patient is heterozygous for a common missense polymorphism in the HFE gene which occurs at a frequency of 0.013% in the 1000 genomes project. OMIM reports 6 phenotypes associated with

variants in the HFE gene including Hemochromatosis, [Transferrin serum level QTL2], susceptibility to Alzheimer disease, Microvascular complications of diabetes 7, susceptibility to Porphyria cutanea tarda, susceptibility to Porphyria variegata. This variant causes a nonsynonymous severe amino acid substitution (p.C282Y) which may alter protein function. ClinVar classifies this variant as pathogenic, other and non-pathogenic and reports an association with Hereditary hemochromatosis, Porphyria cutanea tarda (susceptibility to), Porphyria variegata (susceptibility to), Hemochromatosis (juvenile) (digenic), Alzheimer disease (susceptibility to), Transferrin serum level quantitative trait locus 2, Microvascular complications of diabetes 7, not specified. This variant is predicted to be deleterious by SIFT and deleterious by PolyPhen2.

#### *c.2413delG*

The patient is heterozygous for a rare mutation in the LYST gene which doesn't occur in the 1000 genomes project. OMIM reports that variants in the LYST gene are associated with Chediak-Higashi syndrome. This variant causes a frameshift which may significantly alter protein expression or function. ClinVar classifies this variant as pathogenic and reports an association with Chédiak-Higashi syndrome.

#### *c.1810C>T*

The patient is heterozygous for a common missense polymorphism in the NTRK1 gene which occurs at a frequency of 0.024% in the 1000 genomes project. OMIM reports 2 phenotypes associated with variants in the NTRK1 gene including Insensitivity to pain (congenital) (with anhidrosis), Medullary thyroid carcinoma (familial). This variant causes a nonsynonymous moderate amino acid substitution (p.H604Y) which may alter protein function. ClinVar classifies this variant as pathogenic and non-pathogenic and reports an association with Familial medullary thyroid carcinoma, Hereditary insensitivity to pain with anhidrosis, Hereditary insensitivity to pain with anhidrosis. This variant is predicted to be deleterious by SIFT and deleterious by PolyPhen2.

#### *c.9406-1G>T*

The patient is heterozygous for a common polymorphism in the VPS13B gene which doesn't occur in the 1000 genomes project. OMIM reports that variants in the VPS13B gene are associated with Cohen syndrome. ClinVar classifies this variant as probable-pathogenic and reports an association with Cohen syndrome.

#### *c.139C>G*

The patient is heterozygous for a rare missense mutation in the BRIP1 gene which doesn't occur in the 1000 genomes project. OMIM reports 2 phenotypes associated with variants in the BRIP1 gene including Breast cancer (early-onset), Fanconi anemia (complementation group J). This variant causes a nonsynonymous conservative amino acid substitution (p.P47A) which may alter protein function. ClinVar classifies this variant as pathogenic and other and reports an association with Breast cancer (early-onset), Neoplastic Syndromes (Hereditary). This variant is predicted to be deleterious by PolyPhen2.

#### *c.1601A>G*

The patient is homozygous for a common missense polymorphism in the F5 gene which occurs at a frequency of 0.99% in the 1000 genomes project. OMIM reports 6 phenotypes associated with variants in the F5 gene including Factor V deficiency, Thrombophilia due to activated protein C resistance, Budd-Chiari syndrome, susceptibility to Pregnancy loss recurrent 1, susceptibility to Stroke (ischemic), susceptibility to Thrombophilia due to factor V Leiden. This variant causes a nonsynonymous conservative amino acid substitution (p.Q534R) which may alter protein function. ClinVar classifies this variant as pathogenic, untested and other and reports an association with Thrombophilia due to factor V Leiden, Ischemic stroke (susceptibility to), Budd-Chiari syndrome (susceptibility to), Recurrent abortion. This variant is predicted to be tolerable by SIFT

#### *c.85C>T*

The patient is homozygous for a common missense polymorphism in the DPYD gene which occurs at a frequency of 0.74% in the 1000 genomes project. OMIM reports 2 phenotypes



associated with variants in the DPYD gene including 5-fluorouracil toxicity, Dihydropyrimidine dehydrogenase deficiency. This variant causes a nonsynonymous severe amino acid substitution (p.R29C) which may alter protein function. ClinVar classifies this variant as pathogenic and reports an association with Dihydropyrimidine dehydrogenase deficiency;. This variant is predicted to be tolerable by SIFT and deleterious by PolyPhen2.

#### c.97G>A

The patient is heterozygous for a common missense polymorphism in the DCLRE1C gene which occurs at a frequency of 0.0062% in the 1000 genomes project. OMIM reports 2 phenotypes associated with variants in the DCLRE1C gene including Omenn syndrome, Severe combined immunodeficiency (Athabaskan type). This variant causes a nonsynonymous moderate amino acid substitution (p.G33R) which may alter protein function. ClinVar classifies this variant as probable-pathogenic and reports an association with Severe combined immunodeficiency disease. This variant is predicted to be deleterious by SIFT and deleterious by PolyPhen2.

#### c.86A>T

The patient is heterozygous for a common missense polymorphism in the PRSS1 gene which doesn't occur in the 1000 genomes project. OMIM reports 2 phenotypes associated with variants in the PRSS1 gene including Pancreatitis (hereditary), Trypsinogen deficiency. This variant causes a nonsynonymous moderate amino acid substitution (p.N29I) which may alter protein function. ClinVar classifies this variant as pathogenic and reports an association with Hereditary pancreatitis;Hereditary pancreatitis. This variant is predicted to be deleterious by SIFT and benign by PolyPhen2.

#### c.461G>A

The patient is heterozygous for a common nonsense polymorphism in the FUT2 gene which occurs at a frequency of 0.32% in the 1000 genomes project. OMIM reports 3 phenotypes associated with variants in the FUT2 gene including [Bombay phenotype], resistance to Norwalk virus infection, Vitamin B12 plasma level QTL1. This variant introduces a premature stop codon which may lead to early termination of protein transcription. ClinVar classifies this variant as non-pathogenic, pathogenic and other and reports an association with SECRETOR/NONSECRETOR POLYMORPHISM, Norwalk virus infection ( resistance to), Vitamin b12 plasma level quantitative trait locus 1. This variant is predicted to be tolerable by SIFT

#### c.1838G>T

The patient is heterozygous for a common missense polymorphism in the NTRK1 gene which occurs at a frequency of 0.023% in the 1000 genomes project. OMIM reports 2 phenotypes associated with variants in the NTRK1 gene including Insensitivity to pain (congenital) (with anhidrosis), Medullary thyroid carcinoma (familial). This variant causes a nonsynonymous moderate amino acid substitution (p.G613V) which may alter protein function. ClinVar classifies this variant as pathogenic and non-pathogenic and reports an association with Familial medullary thyroid carcinoma, Hereditary insensitivity to pain with anhidrosis, Hereditary insensitivity to pain with anhidrosis. This variant is predicted to be tolerable by SIFT and possibly deleterious by PolyPhen2.

#### c.161A>G

The patient is heterozygous for a common missense polymorphism in the PRSS1 gene which doesn't occur in the 1000 genomes project. OMIM reports 2 phenotypes associated with variants in the PRSS1 gene including Pancreatitis (hereditary), Trypsinogen deficiency. This variant causes a nonsynonymous conservative amino acid substitution (p.N54S) which may alter protein function. ClinVar classifies this variant as pathogenic and reports an association with Hereditary pancreatitis. This variant is predicted to be tolerable by SIFT and benign by PolyPhen2.

#### c.1621G>A

The patient is heterozygous for a common missense polymorphism in the ELAC2 gene which occurs at a frequency of 0.023% in the 1000 genomes project. OMIM reports 2 phenotypes associated with variants in the ELAC2 gene including Combined oxidative phosphorylation deficiency 17 susceptibility to Prostate cancer (hereditary) (?). This variant causes a nonsynonymous

17, susceptibility to Prostate cancer (hereditary) (2). This variant causes a nonsynonymous moderate amino acid substitution (p.A541T) which may alter protein function. ClinVar classifies this variant as pathogenic and reports an association with Prostate cancer ( hereditary) ( 2). This variant is predicted to be tolerable by SIFT and possibly deleterious by PolyPhen2.

#### *c.913C>T*

The patient is heterozygous for a common missense polymorphism in the OCA2 gene which occurs at a frequency of 0.083% in the 1000 genomes project. OMIM reports 4 phenotypes associated with variants in the OCA2 gene including Albinism (brown oculocutaneous), Albinism (oculocutaneous) (type II), [Skin/hair/eye pigmentation 1 (blond)/brown hair], [Skin/hair/eye pigmentation 1 (blue)/nonblue eyes]. This variant causes a nonsynonymous moderate amino acid substitution (p.R305W) which may alter protein function. ClinVar classifies this variant as pathogenic and reports an association with Skin/hair/eye pigmentation ( variation in) ( 1). This variant is predicted to be deleterious by SIFT and possibly deleterious by PolyPhen2.

#### *c.785A>G*

The patient is heterozygous for a common missense polymorphism in the CYP2B6 gene which doesn't occur in the 1000 genomes project. OMIM reports 2 phenotypes associated with variants in the CYP2B6 gene including poor metabolism of Efavirenz, susceptibility to Efavirenz central nervous system toxicity. This variant causes a nonsynonymous conservative amino acid substitution (p.K262R) which may alter protein function. ClinVar classifies this variant as pathogenic and reports an association with Efavirenz ( poor metabolism of). This variant is predicted to be tolerable by SIFT and benign by PolyPhen2.

#### *c.176T>C*

The patient is homozygous for a common missense polymorphism in the ITGB3 gene which occurs at a frequency of 0.089% in the 1000 genomes project. OMIM reports 5 phenotypes associated with variants in the ITGB3 gene including Bleeding disorder (platelet-type) (16) (autosomal dominant), Glanzmann thrombasthenia, Purpura (posttransfusion), Thrombocytopenia (neonatal alloimmune), susceptibility to Myocardial infarction. This variant causes a nonsynonymous moderate amino acid substitution (p.L59P) which may alter protein function. ClinVar classifies this variant as non-pathogenic, pathogenic and other and reports an association with PL(A1)/(A2) ALLOANTIGEN POLYMORPHISM, Thrombocytopenia ( neonatal alloimmune), Posttransfusion purpura, Myocardial infarction, Fracture ( hip) ( susceptibility to). This variant is predicted to be tolerable by SIFT and benign by PolyPhen2.

#### *c.539C>T*

The patient is heterozygous for a common missense polymorphism in the TIRAP gene which occurs at a frequency of 0.086% in the 1000 genomes project. OMIM reports 4 phenotypes associated with variants in the TIRAP gene including protection against Bacteremia, protection against Malaria, protection against Pneumococcal disease (invasive), protection against Tuberculosis. This variant causes a nonsynonymous moderate amino acid substitution (p.S180L) which may alter protein function. ClinVar classifies this variant as other and pathogenic and reports an association with Invasive pneumococcal disease ( protection against), Malaria ( resistance to), Mycobacterium tuberculosis ( protection against), BACTEREMIA ( RESISTANCE TO). This variant is predicted to be possibly deleterious by PolyPhen2.

#### *c.73G>A*

The patient is heterozygous for a common missense polymorphism in the CST3 gene which occurs at a frequency of 0.21% in the 1000 genomes project. OMIM reports 2 phenotypes associated with variants in the CST3 gene including Cerebral amyloid angiopathy, Macular degeneration (age-related) (11). This variant causes a nonsynonymous moderate amino acid substitution (p.A25T) which may alter protein function. ClinVar classifies this variant as pathogenic and reports an association with Age-related macular degeneration 11. This variant is predicted to be tolerable by SIFT and benign by PolyPhen2.

#### *c.185T>C*

The patient is homozygous for a common missense polymorphism in the HEXB gene which occurs at a frequency of 0.98% in the 1000 genomes project. OMIM reports that variants in the HEXB gene are associated with Sandhoff disease (infantile) (juvenile) (and adult forms). This variant causes a nonsynonymous moderate amino acid substitution (p.L62S) which may alter protein function. ClinVar classifies this variant as pathogenic and reports an association with Sandhoff disease (infantile type). This variant is predicted to be tolerable by SIFT

#### *c.209G>A*

The patient is homozygous for a common missense polymorphism in the BBS2 gene which occurs at a frequency of 1.0% in the 1000 genomes project. OMIM reports that variants in the BBS2 gene are associated with Bardet-Biedl syndrome 2. This variant causes a nonsynonymous conservative amino acid substitution (p.S70N) which may alter protein function. ClinVar classifies this variant as pathogenic and reports an association with Bardet-Biedl syndrome 2. This variant is predicted to be tolerable by SIFT

### INTERPRETATION OF SECONDARY FINDINGS

---

#### *c.7336G>T*

The patient is heterozygous for a rare mutation in the RYR1 gene which doesn't occur in the 1000 genomes project. OMIM reports 5 phenotypes associated with variants in the RYR1 gene including Central core disease, King-Denborough syndrome, Minicore myopathy with external ophthalmoplegia, Neuromuscular disease (congenital) (with uniform type 1 fiber), Malignant hyperthermia susceptibility 1. This variant causes a nonsynonymous severe amino acid substitution (p.G2446C) which may alter protein function. This variant is predicted to be deleterious by SIFT and benign by PolyPhen2.

#### *c.59G>A*

The patient is heterozygous for a common missense polymorphism in the PMS2 gene which occurs at a frequency of 0.076% in the 1000 genomes project. OMIM reports 2 phenotypes associated with variants in the PMS2 gene including Colorectal cancer (hereditary nonpolyposis) (type 4), Mismatch repair cancer syndrome. This variant causes a nonsynonymous conservative amino acid substitution (p.R20Q) which may alter protein function. ClinVar classifies this variant as non-pathogenic and untested and reports an association with Lynch syndrome, not specified, Neoplastic Syndromes (Hereditary). This variant is predicted to be tolerable by SIFT and possibly deleterious by PolyPhen2.

#### *c.1531A>G*

The patient is heterozygous for a common missense polymorphism in the PMS2 gene which occurs at a frequency of 0.011% in the 1000 genomes project. OMIM reports 2 phenotypes associated with variants in the PMS2 gene including Colorectal cancer (hereditary nonpolyposis) (type 4), Mismatch repair cancer syndrome. This variant causes a nonsynonymous moderate amino acid substitution (p.T511A) which may alter protein function. ClinVar classifies this variant as non-pathogenic and untested and reports an association with Lynch syndrome, not specified, Neoplastic Syndromes (Hereditary). Invitae classifies this variant as Benign. This variant is predicted to be tolerable by SIFT and benign by PolyPhen2.

#### *c.371A>G*

The patient is homozygous for a common missense polymorphism in the SDHD gene which occurs at a frequency of 0.95% in the 1000 genomes project. OMIM reports 6 phenotypes associated with variants in the SDHD gene including Carcinoid tumors (intestinal), Cowden syndrome 3, Merkel cell carcinoma (somatic), Paraganglioma and gastric stromal sarcoma, Paragangliomas 1 (with or without deafness), Pheochromocytoma. This variant causes a nonsynonymous conservative amino acid substitution (p.Q124R) which may alter protein function. This variant is predicted to be tolerable by SIFT

predicted to be tolerable by SIFT

#### *c.1415G>A*

The patient is homozygous for a common missense polymorphism in the FBN1 gene which occurs at a frequency of 1.% in the 1000 genomes project. OMIM reports 8 phenotypes associated with variants in the FBN1 gene including Acromicric dysplasia, Aortic aneurysm (ascending) (and dissection), Ectopia lentis (familial), Geleophysic dysplasia 2, MASS syndrome, Marfan syndrome, Stiff skin syndrome, Weill-Marchesani syndrome 2 (dominant). This variant causes a nonsynonymous severe amino acid substitution (p.C472Y) which may alter protein function. This variant is predicted to be tolerable by SIFT and benign by PolyPhen2.

#### *c.1673A>G*

The patient is heterozygous for a common missense polymorphism in the SCN5A gene which occurs at a frequency of 0.23% in the 1000 genomes project. OMIM reports 9 phenotypes associated with variants in the SCN5A gene including Atrial fibrillation (familial) (10), Brugada syndrome 1, Cardiomyopathy (dilated) (1E), Heart block (nonprogressive), Heart block (progressive) (type 1A), Long QT syndrome-3, Sick sinus syndrome 1, Ventricular fibrillation (familial) (1), susceptibility to Sudden infant death syndrome. This variant causes a nonsynonymous conservative amino acid substitution (p.H558R) which may alter protein function. ClinVar classifies this variant as pathogenic and non-pathogenic and reports an association with Progressive familial heart block type 1A, not specified. This variant is predicted to be tolerable by SIFT and benign by PolyPhen2.

#### *c.2326A>G*

The patient is heterozygous for a common missense polymorphism in the DSC2 gene which occurs at a frequency of 0.2% in the 1000 genomes project. OMIM reports 2 phenotypes associated with variants in the DSC2 gene including Arrhythmogenic right ventricular dysplasia 11 with mild palmoplantar keratoderma and woolly hair, Arrhythmogenic right ventricular dysplasia 11. This variant causes a nonsynonymous conservative amino acid substitution (p.I776V) which may alter protein function. ClinVar classifies this variant as non-pathogenic and reports an association with not specified. This variant is predicted to be tolerable by SIFT and benign by PolyPhen2.

#### *c.215C>G*

The patient is heterozygous for a common missense polymorphism in the TP53 gene which occurs at a frequency of 0.54% in the 1000 genomes project. OMIM reports 11 phenotypes associated with variants in the TP53 gene including Adrenal cortical carcinoma, Breast cancer, Choroid plexus papilloma, Colorectal cancer, Hepatocellular carcinoma, Li-Fraumeni syndrome, Nasopharyngeal carcinoma, Osteosarcoma, Pancreatic cancer, Basal cell carcinoma 7, Glioma susceptibility 1. This variant causes a nonsynonymous moderate amino acid substitution (p.P72R) which may alter protein function. ClinVar classifies this variant as non-pathogenic and reports an association with CODON 72 POLYMORPHISM ( ) (rs1042522), , not specified, Neoplastic Syndromes ( Hereditary). This variant is predicted to be tolerable by SIFT and possibly deleterious by PolyPhen2.

#### *c.7397T>C*

The patient is homozygous for a common missense polymorphism in the BRCA2 gene which occurs at a frequency of 0.98% in the 1000 genomes project. OMIM reports 9 phenotypes associated with variants in the BRCA2 gene including Fanconi anemia (complementation group D1), Pancreatic cancer, Prostate cancer, Wilms tumor, susceptibility to Breast cancer (male), Breast-ovarian cancer (familial) (2), Glioblastoma 3, Medulloblastoma, Pre-B-cell acute lymphoblastic leukemia. This variant causes a nonsynonymous moderate amino acid substitution (p.V2466A) which may alter protein function. ClinVar classifies this variant as untested, unknown and non-pathogenic and reports an association with Familial cancer of breast, Breast-ovarian cancer (familial 2), not specified. This variant is predicted to be tolerable by SIFT

#### *c.1014G>C*

The patient is heterozygous for a common missense polymorphism in the MUTYH gene which occurs at a frequency of 0.31% in the 1000 genomes project. OMIM reports 3 phenotypes associated with variants in the MUTYH gene including Adenomas (multiple colorectal), Colorectal

adenomatous polyposis (autosomal recessive) (with pilomatricomas), Gastric cancer (somatic). This variant causes a nonsynonymous conservative amino acid substitution (p.Q338H) which may alter protein function. ClinVar classifies this variant as non-pathogenic and reports an association with , not specified, Neoplastic Syndromes ( Hereditary). This variant is predicted to be tolerable by SIFT and possibly deleterious by PolyPhen2.

#### *c.1636A>G*

The patient is homogeneous for a common missense polymorphism in the MEN1 gene which occurs at a frequency of 0.83% in the 1000 genomes project. OMIM reports 6 phenotypes associated with variants in the MEN1 gene including Adrenal adenoma (somatic), Angiofibroma (somatic), Carcinoid tumor of lung, Lipoma (somatic), Multiple endocrine neoplasia 1, Parathyroid adenoma (somatic). This variant causes a nonsynonymous moderate amino acid substitution (p.T546A) which may alter protein function. ClinVar classifies this variant as non-pathogenic and reports an association with , not specified. This variant is predicted to be tolerable by SIFT and benign by PolyPhen2.

#### *c.2318G>A*

The patient is homogeneous for a common missense polymorphism in the DSG2 gene which occurs at a frequency of 0.24% in the 1000 genomes project. OMIM reports 2 phenotypes associated with variants in the DSG2 gene including Arrhythmogenic right ventricular dysplasia 10, Cardiomyopathy (dilated) (1BB). This variant causes a nonsynonymous conservative amino acid substitution (p.R773K) which may alter protein function. ClinVar classifies this variant as non-pathogenic and reports an association with not specified. This variant is predicted to be tolerable by SIFT and benign by PolyPhen2.

#### *c.5465T>A*

The patient is homogeneous for a common missense polymorphism in the APC gene which occurs at a frequency of 0.87% in the 1000 genomes project. OMIM reports 8 phenotypes associated with variants in the APC gene including Adenoma (periampullary) (somatic), Adenomatous polyposis coli, Brain tumor-polyposis syndrome 2, Colorectal cancer (somatic), Desmoid disease (hereditary), Gardner syndrome, Gastric cancer (somatic), Hepatoblastoma (somatic). This variant causes a nonsynonymous severe amino acid substitution (p.V1822D) which may alter protein function. ClinVar classifies this variant as non-pathogenic and other and reports an association with Adenomatous polyposis coli, , not specified, Familial colorectal cancer, Neoplastic Syndromes ( Hereditary). This variant is predicted to be benign by PolyPhen2.

#### *c.1621A>G*

The patient is homogeneous for a common missense polymorphism in the PMS2 gene which occurs at a frequency of 0.88% in the 1000 genomes project. OMIM reports 2 phenotypes associated with variants in the PMS2 gene including Colorectal cancer (hereditary nonpolyposis) (type 4), Mismatch repair cancer syndrome. This variant causes a nonsynonymous moderate amino acid substitution (p.K541E) which may alter protein function. ClinVar classifies this variant as non-pathogenic and reports an association with Lynch syndrome. This variant is predicted to be tolerable by SIFT and benign by PolyPhen2.

#### *c.4059T>G*

The patient is homogeneous for a common missense polymorphism in the COL3A1 gene which occurs at a frequency of 1.% in the 1000 genomes project. OMIM reports 2 phenotypes associated with variants in the COL3A1 gene including Ehlers-Danlos syndrome (type III), Ehlers-Danlos syndrome (type IV). This variant causes a nonsynonymous conservative amino acid substitution (p.H1353Q) which may alter protein function. This variant is predicted to be tolerable by SIFT and benign by PolyPhen2.

#### *c.1114A>C*

The patient is heterozygous for a common missense polymorphism in the BRCA2 gene which occurs at a frequency of 0.25% in the 1000 genomes project. OMIM reports 9 phenotypes

associated with variants in the BRCA2 gene including Fanconi anemia (complementation group D1), Pancreatic cancer, Prostate cancer, Wilms tumor, susceptibility to Breast cancer (male), Breast-ovarian cancer (familial) (2), Glioblastoma 3, Medulloblastoma, Pre-B-cell acute lymphoblastic leukemia. This variant causes a nonsynonymous moderate amino acid substitution (p.N372H) which may alter protein function. ClinVar classifies this variant as other, non-pathogenic and untested and reports an association with Breast-ovarian cancer (familial 2), , not specified, Neoplastic Syndromes (Hereditary). This variant is predicted to be tolerable by SIFT

#### *c.1486C>G*

The patient is homogeneous for a common missense polymorphism in the MYLK gene which occurs at a frequency of 1.% in the 1000 genomes project. OMIM reports that variants in the MYLK gene are associated with Aortic aneurysm (familial thoracic 7). This variant causes a nonsynonymous conservative amino acid substitution (p.L496V) which may alter protein function. This variant is predicted to be tolerable by SIFT and benign by PolyPhen2.

#### *c.1420G>A*

The patient is homogeneous for a common missense polymorphism in the PCSK9 gene which occurs at a frequency of 0.87% in the 1000 genomes project. OMIM reports 2 phenotypes associated with variants in the PCSK9 gene including Hypercholesterolemia (familial) (3), Low density lipoprotein cholesterol level QTL 1. This variant causes a nonsynonymous conservative amino acid substitution (p.V474I) which may alter protein function. This variant is predicted to be tolerable by SIFT and benign by PolyPhen2.

#### *c.13013G>A*

The patient is homogeneous for a common missense polymorphism in the APOB gene which occurs at a frequency of 0.63% in the 1000 genomes project. OMIM reports 2 phenotypes associated with variants in the APOB gene including Hypercholesterolemia (due to ligand-defective apo B), Hypobetalipoproteinemia. This variant causes a nonsynonymous conservative amino acid substitution (p.S4338N) which may alter protein function. ClinVar classifies this variant as probable-non-pathogenic and reports an association with not specified. This variant is predicted to be tolerable by SIFT and benign by PolyPhen2.

#### *c.2009G>A*

The patient is homogeneous for a common missense polymorphism in the PCSK9 gene which occurs at a frequency of 0.9% in the 1000 genomes project. OMIM reports 2 phenotypes associated with variants in the PCSK9 gene including Hypercholesterolemia (familial) (3), Low density lipoprotein cholesterol level QTL 1. This variant causes a nonsynonymous moderate amino acid substitution (p.G670E) which may alter protein function. ClinVar classifies this variant as non-pathogenic and reports an association with Familial hypercholesterolemia. This variant is predicted to be tolerable by SIFT and benign by PolyPhen2.

## RECOMMENDATIONS

---

Genetic counseling of the family is recommended to discuss the implications of this report.  
[Additional recommendations.]

## METHODS AND LIMITATIONS

---

This report is a sample to be used solely for the purpose of evaluating functionality of the Tute Platform and should not be used in any clinical application.

### Sequencing and Variant Detection

Whole exome sequencing was performed by solution-based hybridization which enriches for coding exons targeting DNA with specific baits. Sequencing was performed using the Illumina HiSeq 2500 to a minimum average exome depth of 90X. Sequencing reads were aligned to the reference genome (hg19) by BWA-MEM and variants were called using FreeBayes.

### Variant Analysis and Report Generation

Reported variants were analyzed using the Tute platform to identify those variants which are reported by medical literature to be pathogenic. All non-synonymous variants of allele frequency <1% reported by the 1000 genomes project and annotated as 'Pathogenic' or 'Probably Pathogenic' by ClinVar are reported in the table 'Primary/Diagnostic Sequence Variant(s) Detected'. Careful correlation of these variants with the clinical indications for the proband should be conducted by an experience medical geneticist to verify that reported findings are consistent with reported clinical phenotypes. Additionally, variants are included based on ACMG guidelines for the reporting of incidental findings in the table 'Secondary/Incidental Sequence Variant(s) Detected'.

### Validation of reported findings

Variants of interest should be confirmed by Sanger sequencing. The DNA immediately flanking each of these variants should be amplified genomic DNA followed by sequencing in both directions using fluorescent dideoxy sequencing.

### Limitations

Absence of a primary diagnostic finding identified by this test does not exclude the possibility of a genetic basis for the clinical condition for this proband. Certain genetic abnormalities are not detectable by the technologies used to generate this report. Specifically, detection of abnormal variants depends on the presence of these sequence variants in the sequencing data. This exome sequence test is designed to evaluate single nucleotide variants within the human exome; however, this technology is only able to sequence 90-95% of the human reference to the requisite 10-fold coverage needed for reliable detection of heterozygous variants.

Additionally, certain types of genetic abnormalities are difficult to identify in sequencing data and have not been validated for clinical use including insertions, deletions, copy number alterations, long repetitive sequences, triplet repeat expansions, chromosomal rearrangements, polyploidy, repetitive regions including mono-, di- and tri-nucleotide repeats, GX rich regions, intronic variants outside the splice-site and epigenetic effects.

Variants believed to be benign based on medical literature, or with population frequencies greater than or equal to 1%, or resulting in synonymous amino acid changes, or occurring in 5' or 3' untranslated regions are generally not reported.

This report is a sample to be used solely for the purpose of evaluating functionality of the Tute Platform and should not be used in any clinical application.

## Sources

---

### REPORT SIGNATURES

---

Online Mendelian Inheritance in Man, OMIM (TM). Retrieved 0/26/2015 from <http://www.ncbi.nlm.nih.gov/omim/>  
ClinVar. Retrieved 0/26/2015 from <http://www.ncbi.nlm.nih.gov/clinvar/>



**ORDERING PROVIDER**

,

**SPECIMEN**

Collection Date:

Received Date:

Report Date:

**PATIENT**

Name:

Date of Birth:

Patient ID:

Gender:

Clinical Indication:

---

[Detailed clinical description.]

**TEST RESULTS SUMMARY**

---

Primary Result(s): [Findings related to clinical indication.]

Incidental/Secondary Result(s): [Incidental findings.]

PRIMARY/DIAGNOSTIC SEQUENCE VARIANT(S) DETECTED

| Gene    | Nucleotide Change | Protein Change | Zygoty | Tute Dx                                                       |
|---------|-------------------|----------------|--------|---------------------------------------------------------------|
| HFE     | c.845G>A          | p.C282Y        | het    | Hereditary hemochromatosis Hemochromatosis, juvenile, digenic |
| MKKS    | c.724G>T          | p.A242S        | het    | McKusick Kaufman syndrome                                     |
| F5      | c.1601A>G         | p.Q534R        | het    | Thrombophilia due to factor V Leiden                          |
| TGM1    | c.1552G>A         | p.V518M        | het    | Autosomal recessive congenital ichthyosis 1                   |
| DPYD    | c.85C>T           | p.R29C         | hom    | Dihydropyrimidine dehydrogenase deficiency;not provided       |
| DCLRE1C | c.97G>A           | p.G33R         | het    | Severe combined immunodeficiency disease                      |
| PRSS1   | c.86A>T           | p.N29I         | het    | Hereditary pancreatitis;Hereditary pancreatitis               |
| FUT2    | c.461G>A          | p.W154X        | het    | Norwalk virus infection, resistance to                        |
| PRSS1   | c.47C>T           | p.A16V         | het    | Hereditary pancreatitis                                       |
| PRSS1   | c.161A>G          | p.N54S         | het    | Hereditary pancreatitis                                       |
| OCA2    | c.913C>T          | p.R305W        | het    | Skin/hair/eye pigmentation, variation in, 1                   |
| TIRAP   | c.539C>T          | p.S180L        | het    | Malaria, resistance to BACTEREMIA, RESISTANCE TO              |
| CST3    | c.73G>A           | p.A25T         | het    | Age-related macular degeneration 11                           |
| HEXB    | c.185T>C          | p.L62S         | hom    | Sandhoff disease, infantile type                              |
| BBS2    | c.209G>A          | p.S70N         | hom    | Bardet-Biedl syndrome 2                                       |
| KLK1    | c.230G>A          | p.R77H         | het    | Kallikrein, decreased urinary activity of                     |
| ITGA2B  | c.2621T>G         | p.I874S        | hom    | Bak platelet-specific antigen                                 |
| FCGR3B  | c.302A>G          | p.N101S        | hom    | Neutrophil-specific antigens na1/na2                          |
| ART4    | c.793G>A          | p.D265N        | hom    | DOMBROCK BLOOD GROUP                                          |
| HPD     | c.97A>G           | p.T33A         | hom    | 4-Alpha-hydroxyphenylpyruvate hydroxylase deficiency          |

## SECONDARY/INCIDENTAL SEQUENCE VARIANT(S) DETECTED

The American College of Medical Genetics and Genomics (ACMG) recently published a policy statement on clinical sequencing that emphasizes the possibility of recognizing and reporting incidental or secondary findings of medical value when conducting exome and genome sequencing. The ACMG recommends that laboratories performing clinical sequencing seek and report mutations of specified classes or types in the genes listed within the guidelines. This section of the report describes variants which fit the criteria outlined by ACMG for the reporting of incidental or secondary findings.

| Gene   | Nucleotide Change | Protein Change | Zygoty | Tute Dx                          |
|--------|-------------------|----------------|--------|----------------------------------|
| BRCA1  | c.2477C>A         | p.T826K        | het    | Breast cancer                    |
| MUTYH  | c.1276C>T         | p.R426C        | het    | Adenomatous polyposis coli       |
| MUTYH  | c.64G>A           | p.V22M         | het    | .                                |
| PMS2   | c.1531A>G         | p.T511A        | het    | .                                |
| BRCA1  | c.1067A>G         | p.Q356R        | hom    | .                                |
| SDHD   | c.371A>G          | p.Q124R        | hom    | .                                |
| FBN1   | c.1415G>A         | p.C472Y        | hom    | .                                |
| DSC2   | c.2326A>G         | p.I776V        | het    | .                                |
| BRCA2  | c.7397T>C         | p.V2466A       | hom    | Breast cancer                    |
| MUTYH  | c.1014G>C         | p.Q338H        | het    | .                                |
| MEN1   | c.1636A>G         | p.T546A        | hom    | .                                |
| DSG2   | c.2318G>A         | p.R773K        | het    | .                                |
| APC    | c.5465T>A         | p.V1822D       | het    | .                                |
| PMS2   | c.1621A>G         | p.K541E        | hom    | Colorectal cancer, non-polyposis |
| COL3A1 | c.4059T>G         | p.H1353Q       | hom    | .                                |
| BRCA2  | c.1114A>C         | p.N372H        | het    | .                                |
| MYLK   | c.1486C>G         | p.L496V        | hom    | .                                |
| PCSK9  | c.1420G>A         | p.V474I        | hom    | .                                |
| APOB   | c.13013G>A        | p.S4338N       | hom    | .                                |
| PCSK9  | c.2009G>A         | p.G670E        | hom    | .                                |

## INTERPRETATION OF PRIMARY FINDINGS

### *c.845G>A*

The patient is heterozygous for a common missense polymorphism in the HFE gene which occurs at a frequency of 0.013% in the 1000 genomes project. OMIM reports 6 phenotypes associated with variants in the HFE gene including Hemochromatosis, [Transferrin serum level QTL2], susceptibility to Alzheimer disease, Microvascular complications of diabetes 7, susceptibility to Porphyria cutanea tarda, susceptibility to Porphyria variegata. This variant causes a nonsynonymous severe amino acid substitution (p.C282Y) which may alter protein function. ClinVar classifies this variant as pathogenic, other and non-pathogenic and reports an association with Hereditary

hemochromatosis, Porphyria cutanea tarda (susceptibility to), Porphyria variegata (susceptibility to), Hemochromatosis (juvenile) (digenic), Alzheimer disease (susceptibility to), Transferrin serum level quantitative trait locus 2, Microvascular complications of diabetes 7, not specified. This variant is predicted to be deleterious by SIFT and deleterious by PolyPhen2.

#### *c.724G>T*

The patient is heterozygous for a rare missense mutation in the MKKS gene which occurs at a frequency of 0.0018% in the 1000 genomes project. OMIM reports 2 phenotypes associated with variants in the MKKS gene including Bardet-Biedl syndrome 6, McKusick-Kaufman syndrome. This variant causes a nonsynonymous moderate amino acid substitution (p.A242S) which may alter protein function. ClinVar classifies this variant as pathogenic and reports an association with McKusick Kaufman syndrome. This variant is predicted to be tolerable by SIFT and deleterious by PolyPhen2.

#### *c.1601A>G*

The patient is heterozygous for a common missense polymorphism in the F5 gene which occurs at a frequency of 0.99% in the 1000 genomes project. OMIM reports 6 phenotypes associated with variants in the F5 gene including Factor V deficiency, Thrombophilia due to activated protein C resistance, Budd-Chiari syndrome, susceptibility to Pregnancy loss recurrent 1, susceptibility to Stroke (ischemic), susceptibility to Thrombophilia due to factor V Leiden. This variant causes a nonsynonymous conservative amino acid substitution (p.Q534R) which may alter protein function. ClinVar classifies this variant as pathogenic, untested and other and reports an association with Thrombophilia due to factor V Leiden, Ischemic stroke (susceptibility to), Budd-Chiari syndrome (susceptibility to), Recurrent abortion. This variant is predicted to be tolerable by SIFT

#### *c.1552G>A*

The patient is heterozygous for a common missense polymorphism in the TGM1 gene which occurs at a frequency of 0.0036% in the 1000 genomes project. OMIM reports that variants in the TGM1 gene are associated with Ichthyosis (congenital) (autosomal recessive 1). This variant causes a nonsynonymous conservative amino acid substitution (p.V518M) which may alter protein function. ClinVar classifies this variant as pathogenic and reports an association with Autosomal recessive congenital ichthyosis 1. This variant is predicted to be tolerable by SIFT and deleterious by PolyPhen2.

#### *c.85C>T*

The patient is homozygous for a common missense polymorphism in the DPYD gene which occurs at a frequency of 0.74% in the 1000 genomes project. OMIM reports 2 phenotypes associated with variants in the DPYD gene including 5-fluorouracil toxicity, Dihydropyrimidine dehydrogenase deficiency. This variant causes a nonsynonymous severe amino acid substitution (p.R29C) which may alter protein function. ClinVar classifies this variant as pathogenic and reports an association with Dihydropyrimidine dehydrogenase deficiency;. This variant is predicted to be tolerable by SIFT and deleterious by PolyPhen2.

#### *c.97G>A*

The patient is heterozygous for a common missense polymorphism in the DCLRE1C gene which occurs at a frequency of 0.0062% in the 1000 genomes project. OMIM reports 2 phenotypes associated with variants in the DCLRE1C gene including Omenn syndrome, Severe combined immunodeficiency (Athabaskan type). This variant causes a nonsynonymous moderate amino acid substitution (p.G33R) which may alter protein function. ClinVar classifies this variant as probable-pathogenic and reports an association with Severe combined immunodeficiency disease. This variant is predicted to be deleterious by SIFT and deleterious by PolyPhen2.

#### *c.86A>T*

The patient is heterozygous for a common missense polymorphism in the PRSS1 gene which doesn't occur in the 1000 genomes project. OMIM reports 2 phenotypes associated with variants in the PRSS1 gene including Pancreatitis (hereditary), Trypsinogen deficiency. This variant causes a nonsynonymous moderate amino acid substitution (p.N90I) which may alter protein function. ClinVar

nonsynonymous moderate amino acid substitution (p.N29I) which may alter protein function. ClinVar classifies this variant as pathogenic and reports an association with Hereditary pancreatitis;Hereditary pancreatitis. This variant is predicted to be deleterious by SIFT and benign by PolyPhen2.

#### *c.461G>A*

The patient is heterozygous for a common nonsense polymorphism in the FUT2 gene which occurs at a frequency of 0.32% in the 1000 genomes project. OMIM reports 3 phenotypes associated with variants in the FUT2 gene including [Bombay phenotype], resistance to Norwalk virus infection, Vitamin B12 plasma level QTL1. This variant introduces a premature stop codon which may lead to early termination of protein transcription. ClinVar classifies this variant as non-pathogenic, pathogenic and other and reports an association with SECRETOR/NONSECRETOR POLYMORPHISM, Norwalk virus infection ( resistance to), Vitamin b12 plasma level quantitative trait locus 1. This variant is predicted to be tolerable by SIFT

#### *c.47C>T*

The patient is heterozygous for a common missense polymorphism in the PRSS1 gene which doesn't occur in the 1000 genomes project. OMIM reports 2 phenotypes associated with variants in the PRSS1 gene including Pancreatitis (hereditary), Trypsinogen deficiency. This variant causes a nonsynonymous moderate amino acid substitution (p.A16V) which may alter protein function. ClinVar classifies this variant as pathogenic and reports an association with Hereditary pancreatitis. This variant is predicted to be tolerable by SIFT and benign by PolyPhen2.

#### *c.161A>G*

The patient is heterozygous for a common missense polymorphism in the PRSS1 gene which doesn't occur in the 1000 genomes project. OMIM reports 2 phenotypes associated with variants in the PRSS1 gene including Pancreatitis (hereditary), Trypsinogen deficiency. This variant causes a nonsynonymous conservative amino acid substitution (p.N54S) which may alter protein function. ClinVar classifies this variant as pathogenic and reports an association with Hereditary pancreatitis. This variant is predicted to be tolerable by SIFT and benign by PolyPhen2.

#### *c.913C>T*

The patient is heterozygous for a common missense polymorphism in the OCA2 gene which occurs at a frequency of 0.083% in the 1000 genomes project. OMIM reports 4 phenotypes associated with variants in the OCA2 gene including Albinism (brown oculocutaneous), Albinism (oculocutaneous) (type II), [Skin/hair/eye pigmentation 1 (blond)/brown hair], [Skin/hair/eye pigmentation 1 (blue)/nonblue eyes]. This variant causes a nonsynonymous moderate amino acid substitution (p.R305W) which may alter protein function. ClinVar classifies this variant as pathogenic and reports an association with Skin/hair/eye pigmentation ( variation in) ( 1). This variant is predicted to be deleterious by SIFT and possibly deleterious by PolyPhen2.

#### *c.539C>T*

The patient is heterozygous for a common missense polymorphism in the TIRAP gene which occurs at a frequency of 0.086% in the 1000 genomes project. OMIM reports 4 phenotypes associated with variants in the TIRAP gene including protection against Bacteremia, protection against Malaria, protection against Pneumococcal disease (invasive), protection against Tuberculosis. This variant causes a nonsynonymous moderate amino acid substitution (p.S180L) which may alter protein function. ClinVar classifies this variant as other and pathogenic and reports an association with Invasive pneumococcal disease ( protection against), Malaria ( resistance to), Mycobacterium tuberculosis ( protection against), BACTEREMIA ( RESISTANCE TO). This variant is predicted to be possibly deleterious by PolyPhen2.

#### *c.73G>A*

The patient is heterozygous for a common missense polymorphism in the CST3 gene which occurs at a frequency of 0.21% in the 1000 genomes project. OMIM reports 2 phenotypes associated with variants in the CST3 gene including Cerebral amyloid angiopathy, Macular degeneration (age-related) (11). This variant causes a nonsynonymous moderate amino acid substitution (p.A25T) which may

(17). This variant causes a nonsynonymous moderate amino acid substitution (p.L62S) which may alter protein function. ClinVar classifies this variant as pathogenic and reports an association with Age-related macular degeneration 11. This variant is predicted to be tolerable by SIFT and benign by PolyPhen2.

#### *c.185T>C*

The patient is homogeneous for a common missense polymorphism in the HEXB gene which occurs at a frequency of 0.98% in the 1000 genomes project. OMIM reports that variants in the HEXB gene are associated with Sandhoff disease (infantile) (juvenile) (and adult forms). This variant causes a nonsynonymous moderate amino acid substitution (p.L62S) which may alter protein function. ClinVar classifies this variant as pathogenic and reports an association with Sandhoff disease (infantile type). This variant is predicted to be tolerable by SIFT

#### *c.209G>A*

The patient is homogeneous for a common missense polymorphism in the BBS2 gene which occurs at a frequency of 1.% in the 1000 genomes project. OMIM reports that variants in the BBS2 gene are associated with Bardet-Biedl syndrome 2. This variant causes a nonsynonymous conservative amino acid substitution (p.S70N) which may alter protein function. ClinVar classifies this variant as pathogenic and reports an association with Bardet-Biedl syndrome 2. This variant is predicted to be tolerable by SIFT

#### *c.230G>A*

The patient is heterozygous for a common missense polymorphism in the KLK1 gene which occurs at a frequency of 0.042% in the 1000 genomes project. OMIM reports that variants in the KLK1 gene are associated with [decreased urinary activity of Kallikrein]. This variant causes a nonsynonymous conservative amino acid substitution (p.R77H) which may alter protein function. ClinVar classifies this variant as pathogenic and reports an association with Kallikrein (decreased urinary activity of). This variant is predicted to be deleterious by SIFT and possibly deleterious by PolyPhen2.

#### *c.2621T>G*

The patient is homogeneous for a common missense polymorphism in the ITGA2B gene which occurs at a frequency of 0.4% in the 1000 genomes project. OMIM reports 3 phenotypes associated with variants in the ITGA2B gene including Bleeding disorder (platelet-type) (16) (autosomal dominant), Glanzmann thrombasthenia, Thrombocytopenia (neonatal alloimmune) (BAK antigen related). This variant causes a nonsynonymous moderate amino acid substitution (p.I874S) which may alter protein function. ClinVar classifies this variant as pathogenic and reports an association with Bak platelet-specific antigen. This variant is predicted to be tolerable by SIFT and benign by PolyPhen2.

#### *c.302A>G*

The patient is homogeneous for a common missense polymorphism in the FCGR3B gene which occurs at a frequency of 0.53% in the 1000 genomes project. OMIM reports that variants in the FCGR3B gene are associated with Neutropenia (alloimmune neonatal). This variant causes a nonsynonymous conservative amino acid substitution (p.N101S) which may alter protein function. ClinVar classifies this variant as pathogenic and reports an association with Neutrophil-specific antigens na1/na2. This variant is predicted to be tolerable by SIFT

#### *c.793G>A*

The patient is homogeneous for a common missense polymorphism in the ART4 gene which occurs at a frequency of 0.29% in the 1000 genomes project. OMIM reports that variants in the ART4 gene are associated with [Blood group (Dombrock)]. This variant causes a nonsynonymous conservative amino acid substitution (p.D265N) which may alter protein function. ClinVar classifies this variant as pathogenic and reports an association with DOMBROCK BLOOD GROUP. This variant is predicted to be tolerable by SIFT and benign by PolyPhen2.

#### *c.97A>G*

The patient is homogeneous for a common missense polymorphism in the HPD gene which occurs at a frequency of 0.88% in the 1000 genomes project. OMIM reports 2 phenotypes associated with

at a frequency of 0.00% in the 1000 genomes project. OMIM reports 2 phenotypes associated with variants in the HPD gene including Hawkinsinuria, Tyrosinemia (type III). This variant causes a nonsynonymous moderate amino acid substitution (p.T33A) which may alter protein function. ClinVar classifies this variant as pathogenic and reports an association with 4-Alpha-hydroxyphenylpyruvate hydroxylase deficiency. This variant is predicted to be tolerable by SIFT

## INTERPRETATION OF SECONDARY FINDINGS

---

### *c.2477C>A*

The patient is heterozygous for a rare missense mutation in the BRCA1 gene which occurs at a frequency of 0.0002% in the 1000 genomes project. OMIM reports 2 phenotypes associated with variants in the BRCA1 gene including Breast-ovarian cancer (familial) (1), susceptibility to Pancreatic cancer 4. This variant causes a nonsynonymous moderate amino acid substitution (p.T826K) which may alter protein function. ClinVar classifies this variant as non-pathogenic, unknown and other and reports an association with BRCA1 and BRCA2 Hereditary Breast and Ovarian Cancer, Familial cancer of breast, Breast-ovarian cancer (familial 1). ARUP classifies this variant as 1 - Not pathogenic or of no clinical significance. Invitae classifies this variant as Benign. This variant is predicted to be deleterious by SIFT and deleterious by PolyPhen2.

### *c.1276C>T*

The patient is heterozygous for a rare missense mutation in the MUTYH gene which doesn't occur in the 1000 genomes project. OMIM reports 3 phenotypes associated with variants in the MUTYH gene including Adenomas (multiple colorectal), Colorectal adenomatous polyposis (autosomal recessive) (with pilomatricomas), Gastric cancer (somatic). This variant causes a nonsynonymous severe amino acid substitution (p.R426C) which may alter protein function. ClinVar classifies this variant as unknown and other and reports an association with , Neoplastic Syndromes (Hereditary), MYH-associated polyposis. Invitae classifies this variant as Variant of uncertain significance. This variant is predicted to be tolerable by SIFT and deleterious by PolyPhen2.

### *c.64G>A*

The patient is heterozygous for a common missense polymorphism in the MUTYH gene which occurs at a frequency of 0.02% in the 1000 genomes project. OMIM reports 3 phenotypes associated with variants in the MUTYH gene including Adenomas (multiple colorectal), Colorectal adenomatous polyposis (autosomal recessive) (with pilomatricomas), Gastric cancer (somatic). This variant causes a nonsynonymous conservative amino acid substitution (p.V22M) which may alter protein function. ClinVar classifies this variant as non-pathogenic and reports an association with , not specified, MYH-associated polyposis, Neoplastic Syndromes (Hereditary). Invitae classifies this variant as Benign. This variant is predicted to be deleterious by SIFT and possibly deleterious by PolyPhen2.

### *c.1531A>G*

The patient is heterozygous for a common missense polymorphism in the PMS2 gene which occurs at a frequency of 0.011% in the 1000 genomes project. OMIM reports 2 phenotypes associated with variants in the PMS2 gene including Colorectal cancer (hereditary nonpolyposis) (type 4), Mismatch repair cancer syndrome. This variant causes a nonsynonymous moderate amino acid substitution (p.T511A) which may alter protein function. ClinVar classifies this variant as non-pathogenic and untested and reports an association with , Lynch syndrome, not specified, Neoplastic Syndromes (Hereditary). Invitae classifies this variant as Benign. This variant is predicted to be tolerable by SIFT and benign by PolyPhen2.

### *c.1067A>G*

The patient is homozygous for a common missense polymorphism in the BRCA1 gene which occurs at a frequency of 0.022% in the 1000 genomes project. OMIM reports 2 phenotypes associated with variants in the BRCA1 gene including Breast-ovarian cancer (familial) (1),

susceptibility to Pancreatic cancer 4. This variant causes a nonsynonymous conservative amino acid substitution (p.Q356R) which may alter protein function. ClinVar classifies this variant as non-pathogenic, other and untested and reports an association with , BRCA1 and BRCA2 Hereditary Breast and Ovarian Cancer, Breast-ovarian cancer ( familial 1), not specified, Neoplastic Syndromes ( Hereditary). ARUP classifies this variant as 1 - Not pathogenic or of no clinical significance. Invitae classifies this variant as Benign. This variant is predicted to be deleterious by SIFT and deleterious by PolyPhen2.

#### *c.371A>G*

The patient is homozygous for a common missense polymorphism in the SDHD gene which occurs at a frequency of 0.95% in the 1000 genomes project. OMIM reports 6 phenotypes associated with variants in the SDHD gene including Carcinoid tumors (intestinal), Cowden syndrome 3, Merkel cell carcinoma (somatic), Paraganglioma and gastric stromal sarcoma, Paragangliomas 1 (with or without deafness), Pheochromocytoma. This variant causes a nonsynonymous conservative amino acid substitution (p.Q124R) which may alter protein function. This variant is predicted to be tolerable by SIFT

#### *c.1415G>A*

The patient is homozygous for a common missense polymorphism in the FBN1 gene which occurs at a frequency of 1.% in the 1000 genomes project. OMIM reports 8 phenotypes associated with variants in the FBN1 gene including Acromioclavicular dysplasia, Aortic aneurysm (ascending) (and dissection), Ectopia lentis (familial), Geleophysic dysplasia 2, MASS syndrome, Marfan syndrome, Stiff skin syndrome, Weill-Marchesani syndrome 2 (dominant). This variant causes a nonsynonymous severe amino acid substitution (p.C472Y) which may alter protein function. This variant is predicted to be tolerable by SIFT and benign by PolyPhen2.

#### *c.2326A>G*

The patient is heterozygous for a common missense polymorphism in the DSC2 gene which occurs at a frequency of 0.2% in the 1000 genomes project. OMIM reports 2 phenotypes associated with variants in the DSC2 gene including Arrhythmogenic right ventricular dysplasia 11 with mild palmoplantar keratoderma and woolly hair, Arrhythmogenic right ventricular dysplasia 11. This variant causes a nonsynonymous conservative amino acid substitution (p.I776V) which may alter protein function. ClinVar classifies this variant as non-pathogenic and reports an association with not specified. This variant is predicted to be tolerable by SIFT and benign by PolyPhen2.

#### *c.7397T>C*

The patient is homozygous for a common missense polymorphism in the BRCA2 gene which occurs at a frequency of 0.98% in the 1000 genomes project. OMIM reports 9 phenotypes associated with variants in the BRCA2 gene including Fanconi anemia (complementation group D1), Pancreatic cancer, Prostate cancer, Wilms tumor, susceptibility to Breast cancer (male), Breast-ovarian cancer (familial) (2), Glioblastoma 3, Medulloblastoma, Pre-B-cell acute lymphoblastic leukemia. This variant causes a nonsynonymous moderate amino acid substitution (p.V2466A) which may alter protein function. ClinVar classifies this variant as untested, unknown and non-pathogenic and reports an association with Familial cancer of breast, Breast-ovarian cancer ( familial 2), not specified. This variant is predicted to be tolerable by SIFT

#### *c.1014G>C*

The patient is heterozygous for a common missense polymorphism in the MUTYH gene which occurs at a frequency of 0.31% in the 1000 genomes project. OMIM reports 3 phenotypes associated with variants in the MUTYH gene including Adenomas (multiple colorectal), Colorectal adenomatous polyposis (autosomal recessive) (with pilomatricomas), Gastric cancer (somatic). This variant causes a nonsynonymous conservative amino acid substitution (p.Q338H) which may alter protein function. ClinVar classifies this variant as non-pathogenic and reports an association with , not specified, Neoplastic Syndromes ( Hereditary). This variant is predicted to be tolerable by SIFT and possibly deleterious by PolyPhen2.

#### *c.1636A>G*



#### *c.1030A>G*

The patient is homozygous for a common missense polymorphism in the MEN1 gene which occurs at a frequency of 0.83% in the 1000 genomes project. OMIM reports 6 phenotypes associated with variants in the MEN1 gene including Adrenal adenoma (somatic), Angiofibroma (somatic), Carcinoid tumor of lung, Lipoma (somatic), Multiple endocrine neoplasia 1, Parathyroid adenoma (somatic). This variant causes a nonsynonymous moderate amino acid substitution (p.T546A) which may alter protein function. ClinVar classifies this variant as non-pathogenic and reports an association with , not specified. This variant is predicted to be tolerable by SIFT and benign by PolyPhen2.

#### *c.2318G>A*

The patient is heterozygous for a common missense polymorphism in the DSG2 gene which occurs at a frequency of 0.24% in the 1000 genomes project. OMIM reports 2 phenotypes associated with variants in the DSG2 gene including Arrhythmogenic right ventricular dysplasia 10, Cardiomyopathy (dilated) (1BB). This variant causes a nonsynonymous conservative amino acid substitution (p.R773K) which may alter protein function. ClinVar classifies this variant as non-pathogenic and reports an association with not specified. This variant is predicted to be tolerable by SIFT and benign by PolyPhen2.

#### *c.5465T>A*

The patient is heterozygous for a common missense polymorphism in the APC gene which occurs at a frequency of 0.87% in the 1000 genomes project. OMIM reports 8 phenotypes associated with variants in the APC gene including Adenoma (periampullary) (somatic), Adenomatous polyposis coli, Brain tumor-polyposis syndrome 2, Colorectal cancer (somatic), Desmoid disease (hereditary), Gardner syndrome, Gastric cancer (somatic), Hepatoblastoma (somatic). This variant causes a nonsynonymous severe amino acid substitution (p.V1822D) which may alter protein function. ClinVar classifies this variant as non-pathogenic and other and reports an association with Adenomatous polyposis coli, , not specified, Familial colorectal cancer, Neoplastic Syndromes ( Hereditary). This variant is predicted to be benign by PolyPhen2.

#### *c.1621A>G*

The patient is homozygous for a common missense polymorphism in the PMS2 gene which occurs at a frequency of 0.88% in the 1000 genomes project. OMIM reports 2 phenotypes associated with variants in the PMS2 gene including Colorectal cancer (hereditary nonpolyposis) (type 4), Mismatch repair cancer syndrome. This variant causes a nonsynonymous moderate amino acid substitution (p.K541E) which may alter protein function. ClinVar classifies this variant as non-pathogenic and reports an association with Lynch syndrome. This variant is predicted to be tolerable by SIFT and benign by PolyPhen2.

#### *c.4059T>G*

The patient is homozygous for a common missense polymorphism in the COL3A1 gene which occurs at a frequency of 1.% in the 1000 genomes project. OMIM reports 2 phenotypes associated with variants in the COL3A1 gene including Ehlers-Danlos syndrome (type III), Ehlers-Danlos syndrome (type IV). This variant causes a nonsynonymous conservative amino acid substitution (p.H1353Q) which may alter protein function. This variant is predicted to be tolerable by SIFT and benign by PolyPhen2.

#### *c.1114A>C*

The patient is heterozygous for a common missense polymorphism in the BRCA2 gene which occurs at a frequency of 0.25% in the 1000 genomes project. OMIM reports 9 phenotypes associated with variants in the BRCA2 gene including Fanconi anemia (complementation group D1), Pancreatic cancer, Prostate cancer, Wilms tumor, susceptibility to Breast cancer (male), Breast-ovarian cancer (familial) (2), Glioblastoma 3, Medulloblastoma, Pre-B-cell acute lymphoblastic leukemia. This variant causes a nonsynonymous moderate amino acid substitution (p.N372H) which may alter protein function. ClinVar classifies this variant as other, non-pathogenic and untested and reports an association with Breast-ovarian cancer ( familial 2), , not specified, Neoplastic Syndromes ( Hereditary). This variant is predicted to be tolerable by SIFT

( Hereditary). This variant is predicted to be tolerable by SIFT

#### *c.1486C>G*

The patient is homogeneous for a common missense polymorphism in the MYLK gene which occurs at a frequency of 1.% in the 1000 genomes project. OMIM reports that variants in the MYLK gene are associated with Aortic aneurysm (familial thoracic 7). This variant causes a nonsynonymous conservative amino acid substitution (p.L496V) which may alter protein function. This variant is predicted to be tolerable by SIFT and benign by PolyPhen2.

#### *c.1420G>A*

The patient is homogeneous for a common missense polymorphism in the PCSK9 gene which occurs at a frequency of 0.87% in the 1000 genomes project. OMIM reports 2 phenotypes associated with variants in the PCSK9 gene including Hypercholesterolemia (familial) (3), Low density lipoprotein cholesterol level QTL 1. This variant causes a nonsynonymous conservative amino acid substitution (p.V474I) which may alter protein function. This variant is predicted to be tolerable by SIFT and benign by PolyPhen2.

#### *c.13013G>A*

The patient is homogeneous for a common missense polymorphism in the APOB gene which occurs at a frequency of 0.63% in the 1000 genomes project. OMIM reports 2 phenotypes associated with variants in the APOB gene including Hypercholesterolemia (due to ligand-defective apo B), Hypobetalipoproteinemia. This variant causes a nonsynonymous conservative amino acid substitution (p.S4338N) which may alter protein function. ClinVar classifies this variant as probable-non-pathogenic and reports an association with not specified. This variant is predicted to be tolerable by SIFT and benign by PolyPhen2.

#### *c.2009G>A*

The patient is homogeneous for a common missense polymorphism in the PCSK9 gene which occurs at a frequency of 0.9% in the 1000 genomes project. OMIM reports 2 phenotypes associated with variants in the PCSK9 gene including Hypercholesterolemia (familial) (3), Low density lipoprotein cholesterol level QTL 1. This variant causes a nonsynonymous moderate amino acid substitution (p.G670E) which may alter protein function. ClinVar classifies this variant as non-pathogenic and reports an association with Familial hypercholesterolemia. This variant is predicted to be tolerable by SIFT and benign by PolyPhen2.

## RECOMMENDATIONS

---

Genetic counseling of the family is recommended to discuss the implications of this report.

[Additional recommendations.]

## METHODS AND LIMITATIONS

---

This report is a sample to be used solely for the purpose of evaluating functionality of the Tute Platform and should not be used in any clinical application.

### Sequencing and Variant Detection

Whole exome sequencing was performed by solution-based hybridization which enriches for coding exons targeting DNA with specific baits. Sequencing was performed using the Illumina HiSeq 2500 to a minimum average exome depth of 90X. Sequencing reads were aligned to the reference genome (hg19) by BWA-MEM and variants were called using FreeBayes.

### Variant Analysis and Report Generation

Reported variants were analyzed using the Tute platform to identify those variants which are reported by medical literature to be pathogenic. All non-synonymous variants of allele frequency <1% reported by the 1000 genomes project and annotated as 'Pathogenic' or 'Probably Pathogenic' by ClinVar are reported in the table 'Primary/Diagnostic Sequence Variant(s) Detected'. Careful correlation of these variants with the clinical indications for the proband should be conducted by an experience medical geneticist to verify that reported findings are consistent with reported clinical phenotypes. Additionally, variants are included based on ACMG guidelines for the reporting of incidental findings in the table 'Secondary/Incidental Sequence Variant(s) Detected'.

### Validation of reported findings

Variants of interest should be confirmed by Sanger sequencing. The DNA immediately flanking each of these variants should be amplified genomic DNA followed by sequencing in both directions using fluorescent dideoxy sequencing.

### Limitations

Absence of a primary diagnostic finding identified by this test does not exclude the possibility of a genetic basis for the clinical condition for this proband. Certain genetic abnormalities are not detectable by the technologies used to generate this report. Specifically, detection of abnormal variants depends on the presence of these sequence variants in the sequencing data. This exome sequence test is designed to evaluate single nucleotide variants within the human exome; however, this technology is only able to sequence 90-95% of the human reference to the requisite 10-fold coverage needed for reliable detection of heterozygous variants.

Additionally, certain types of genetic abnormalities are difficult to identify in sequencing data and have not been validated for clinical use including insertions, deletions, copy number alterations, long repetitive sequences, triplet repeat expansions, chromosomal rearrangements, polyploidy, repetitive regions including mono-, di- and tri-nucleotide repeats, GX rich regions, intronic variants outside the splice-site and epigenetic effects.

Variants believed to be benign based on medical literature, or with population frequencies greater than or equal to 1%, or resulting in synonymous amino acid changes, or occurring in 5' or 3' untranslated regions are generally not reported.

This report is a sample to be used solely for the purpose of evaluating functionality of the Tute Platform and should not be used in any clinical application.

## Sources

---

### REPORT SIGNATURES

---

Online Mendelian Inheritance in Man, OMIM (TM). Retrieved 0/26/2015 from <http://www.ncbi.nlm.nih.gov/omim/>  
ClinVar. Retrieved 0/26/2015 from <http://www.ncbi.nlm.nih.gov/clinvar/>

**ORDERING PROVIDER**

,

**SPECIMEN**

Collection Date:

Received Date:

Report Date:

**PATIENT**

Name:

Date of Birth:

Patient ID:

Gender:

Clinical Indication:

---

[Detailed clinical description.]

**TEST RESULTS SUMMARY**

---

Primary Result(s): [Findings related to clinical indication.]

Incidental/Secondary Result(s): [Incidental findings.]

PRIMARY/DIAGNOSTIC SEQUENCE VARIANT(S) DETECTED

| Gene    | Nucleotide Change | Protein Change | Zygoty | Tute Dx                                                                         |
|---------|-------------------|----------------|--------|---------------------------------------------------------------------------------|
| LYST    | c.2413delG        | p.E805fs       | het    | Chédiak-Higashi syndrome                                                        |
| VPS13B  | c.9406-1G>T       | .              | het    | Cohen syndrome                                                                  |
| F5      | c.1601A>G         | p.Q534R        | hom    | Thrombophilia due to factor V Leiden                                            |
| TGM1    | c.1552G>A         | p.V518M        | het    | Autosomal recessive congenital ichthyosis 1                                     |
| DPYD    | c.85C>T           | p.R29C         | hom    | Dihydropyrimidine dehydrogenase deficiency;not provided                         |
| DCLRE1C | c.97G>A           | p.G33R         | het    | Severe combined immunodeficiency disease                                        |
| PRSS1   | c.86A>T           | p.N29I         | het    | Hereditary pancreatitis;Hereditary pancreatitis                                 |
| ELAC2   | c.1621G>A         | p.A541T        | het    | Prostate cancer, hereditary, 2                                                  |
| OCA2    | c.913C>T          | p.R305W        | het    | Skin/hair/eye pigmentation, variation in, 1                                     |
| PRF1    | c.755A>G          | p.N252S        | het    | Hemophagocytic lymphohistiocytosis, familial, 2 Malignant lymphoma, non-Hodgkin |
| KRT85   | c.233G>A          | p.R78H         | het    | Ectodermal dysplasia, 'pure' hair-nail type                                     |
| CYP2B6  | c.785A>G          | p.K262R        | het    | Efavirenz, poor metabolism of                                                   |
| ITGB3   | c.176T>C          | p.L59P         | het    | Thrombocytopenia, neonatal alloimmune Posttransfusion purpura                   |
| CST3    | c.73G>A           | p.A25T         | hom    | Age-related macular degeneration 11                                             |
| HEXB    | c.185T>C          | p.L62S         | hom    | Sandhoff disease, infantile type                                                |
| BANK1   | c.182G>A          | p.R61H         | het    | Systemic lupus erythmatosus, association with                                   |
| BBS2    | c.209G>A          | p.S70N         | hom    | Bardet-Biedl syndrome 2                                                         |
| KLK1    | c.230G>A          | p.R77H         | het    | Kallikrein, decreased urinary activity of                                       |
| NAT1    | c.445G>A          | p.V149I        | het    | NAT1*17 ALLELE                                                                  |
| ITGA2B  | c.2621T>G         | p.I874S        | hom    | Bak platelet-specific antigen                                                   |

## SECONDARY/INCIDENTAL SEQUENCE VARIANT(S) DETECTED

The American College of Medical Genetics and Genomics (ACMG) recently published a policy statement on clinical sequencing that emphasizes the possibility of recognizing and reporting incidental or secondary findings of medical value when conducting exome and genome sequencing. The ACMG recommends that laboratories performing clinical sequencing seek and report mutations of specified classes or types in the genes listed within the guidelines. This section of the report describes variants which fit the criteria outlined by ACMG for the reporting of incidental or secondary findings.

| Gene   | Nucleotide Change | Protein Change | Zygosity | Tute Dx                                  |
|--------|-------------------|----------------|----------|------------------------------------------|
| RYR1   | c.7336G>T         | p.G2446C       | het      | .                                        |
| BRCA1  | c.2477C>A         | p.T826K        | het      | Breast cancer                            |
| MUTYH  | c.64G>A           | p.V22M         | het      | .                                        |
| PMS2   | c.1531A>G         | p.T511A        | het      | .                                        |
| BRCA1  | c.1067A>G         | p.Q356R        | het      | .                                        |
| SDHD   | c.371A>G          | p.Q124R        | hom      | .                                        |
| FBN1   | c.1415G>A         | p.C472Y        | hom      | .                                        |
| SCN5A  | c.1673A>G         | p.H558R        | het      | Progressive familial heart block type 1A |
| DSC2   | c.2326A>G         | p.I776V        | het      | .                                        |
| APOB   | c.1853C>T         | p.A618V        | het      | .                                        |
| TP53   | c.215C>G          | p.P72R         | het      | .                                        |
| BRCA2  | c.7397T>C         | p.V2466A       | hom      | Breast cancer                            |
| MUTYH  | c.1014G>C         | p.Q338H        | het      | .                                        |
| MEN1   | c.1636A>G         | p.T546A        | hom      | .                                        |
| DSG2   | c.2318G>A         | p.R773K        | het      | .                                        |
| APC    | c.5465T>A         | p.V1822D       | het      | .                                        |
| PMS2   | c.1621A>G         | p.K541E        | hom      | Colorectal cancer, non-polyposis         |
| COL3A1 | c.4059T>G         | p.H1353Q       | hom      | .                                        |
| BRCA2  | c.1114A>C         | p.N372H        | het      | .                                        |
| MYLK   | c.1486C>G         | p.L496V        | hom      | .                                        |

## INTERPRETATION OF PRIMARY FINDINGS

### *c.2413delG*

The patient is heterozygous for a rare mutation in the LYST gene which doesn't occur in the 1000 genomes project. OMIM reports that variants in the LYST gene are associated with Chediak-Higashi syndrome. This variant causes a frameshift which may significantly alter protein expression or function. ClinVar classifies this variant as pathogenic and reports an association with Chediak-Higashi syndrome.

function. ClinVar classifies this variant as pathogenic and reports an association with Chediak-Higashi syndrome.

#### *c.9406-1G>T*

The patient is heterozygous for a common polymorphism in the VPS13B gene which doesn't occur in the 1000 genomes project. OMIM reports that variants in the VPS13B gene are associated with Cohen syndrome. ClinVar classifies this variant as probable-pathogenic and reports an association with Cohen syndrome.

#### *c.1601A>G*

The patient is homozygous for a common missense polymorphism in the F5 gene which occurs at a frequency of 0.99% in the 1000 genomes project. OMIM reports 6 phenotypes associated with variants in the F5 gene including Factor V deficiency, Thrombophilia due to activated protein C resistance, Budd-Chiari syndrome, susceptibility to Pregnancy loss recurrent 1, susceptibility to Stroke (ischemic), susceptibility to Thrombophilia due to factor V Leiden. This variant causes a nonsynonymous conservative amino acid substitution (p.Q534R) which may alter protein function. ClinVar classifies this variant as pathogenic, untested and other and reports an association with Thrombophilia due to factor V Leiden, Ischemic stroke (susceptibility to), Budd-Chiari syndrome (susceptibility to), Recurrent abortion. This variant is predicted to be tolerable by SIFT

#### *c.1552G>A*

The patient is heterozygous for a common missense polymorphism in the TGM1 gene which occurs at a frequency of 0.0036% in the 1000 genomes project. OMIM reports that variants in the TGM1 gene are associated with Ichthyosis (congenital) (autosomal recessive 1). This variant causes a nonsynonymous conservative amino acid substitution (p.V518M) which may alter protein function. ClinVar classifies this variant as pathogenic and reports an association with Autosomal recessive congenital ichthyosis 1. This variant is predicted to be tolerable by SIFT and deleterious by PolyPhen2.

#### *c.85C>T*

The patient is homozygous for a common missense polymorphism in the DPYD gene which occurs at a frequency of 0.74% in the 1000 genomes project. OMIM reports 2 phenotypes associated with variants in the DPYD gene including 5-fluorouracil toxicity, Dihydropyrimidine dehydrogenase deficiency. This variant causes a nonsynonymous severe amino acid substitution (p.R29C) which may alter protein function. ClinVar classifies this variant as pathogenic and reports an association with Dihydropyrimidine dehydrogenase deficiency;. This variant is predicted to be tolerable by SIFT and deleterious by PolyPhen2.

#### *c.97G>A*

The patient is heterozygous for a common missense polymorphism in the DCLRE1C gene which occurs at a frequency of 0.0062% in the 1000 genomes project. OMIM reports 2 phenotypes associated with variants in the DCLRE1C gene including Omenn syndrome, Severe combined immunodeficiency (Athabaskan type). This variant causes a nonsynonymous moderate amino acid substitution (p.G33R) which may alter protein function. ClinVar classifies this variant as probable-pathogenic and reports an association with Severe combined immunodeficiency disease. This variant is predicted to be deleterious by SIFT and deleterious by PolyPhen2.

#### *c.86A>T*

The patient is heterozygous for a common missense polymorphism in the PRSS1 gene which doesn't occur in the 1000 genomes project. OMIM reports 2 phenotypes associated with variants in the PRSS1 gene including Pancreatitis (hereditary), Trypsinogen deficiency. This variant causes a nonsynonymous moderate amino acid substitution (p.N29I) which may alter protein function. ClinVar classifies this variant as pathogenic and reports an association with Hereditary pancreatitis;Hereditary pancreatitis. This variant is predicted to be deleterious by SIFT and benign by PolyPhen2.

#### *c.1621G>A*



The patient is heterozygous for a common missense polymorphism in the ELAC2 gene which occurs at a frequency of 0.023% in the 1000 genomes project. OMIM reports 2 phenotypes associated with variants in the ELAC2 gene including Combined oxidative phosphorylation deficiency 17, susceptibility to Prostate cancer (hereditary) (2). This variant causes a nonsynonymous moderate amino acid substitution (p.A541T) which may alter protein function. ClinVar classifies this variant as pathogenic and reports an association with Prostate cancer (hereditary) (2). This variant is predicted to be tolerable by SIFT and possibly deleterious by PolyPhen2.

#### *c.913C>T*

The patient is heterozygous for a common missense polymorphism in the OCA2 gene which occurs at a frequency of 0.083% in the 1000 genomes project. OMIM reports 4 phenotypes associated with variants in the OCA2 gene including Albinism (brown oculocutaneous), Albinism (oculocutaneous) (type II), [Skin/hair/eye pigmentation 1 (blond)/brown hair], [Skin/hair/eye pigmentation 1 (blue)/nonblue eyes]. This variant causes a nonsynonymous moderate amino acid substitution (p.R305W) which may alter protein function. ClinVar classifies this variant as pathogenic and reports an association with Skin/hair/eye pigmentation (variation in) (1). This variant is predicted to be deleterious by SIFT and possibly deleterious by PolyPhen2.

#### *c.755A>G*

The patient is heterozygous for a common missense polymorphism in the PRF1 gene which occurs at a frequency of 0.0076% in the 1000 genomes project. OMIM reports 2 phenotypes associated with variants in the PRF1 gene including Hemophagocytic lymphohistiocytosis (familial) (2), Lymphoma (non-Hodgkin). This variant causes a nonsynonymous conservative amino acid substitution (p.N252S) which may alter protein function. ClinVar classifies this variant as pathogenic and reports an association with Hemophagocytic lymphohistiocytosis (familial) (2), Malignant lymphoma (non-Hodgkin). This variant is predicted to be tolerable by SIFT and benign by PolyPhen2.

#### *c.233G>A*

The patient is heterozygous for a common missense polymorphism in the KRT85 gene which occurs at a frequency of 0.033% in the 1000 genomes project. OMIM reports that variants in the KRT85 gene are associated with Ectodermal dysplasia 4 (hair)/nail type. This variant causes a nonsynonymous conservative amino acid substitution (p.R78H) which may alter protein function. ClinVar classifies this variant as pathogenic and untested and reports an association with Ectodermal dysplasia (')'pure' hair-nail type. This variant is predicted to be tolerable by SIFT and benign by PolyPhen2.

#### *c.785A>G*

The patient is heterozygous for a common missense polymorphism in the CYP2B6 gene which doesn't occur in the 1000 genomes project. OMIM reports 2 phenotypes associated with variants in the CYP2B6 gene including poor metabolism of Efavirenz, susceptibility to Efavirenz central nervous system toxicity. This variant causes a nonsynonymous conservative amino acid substitution (p.K262R) which may alter protein function. ClinVar classifies this variant as pathogenic and reports an association with Efavirenz (poor metabolism of). This variant is predicted to be tolerable by SIFT and benign by PolyPhen2.

#### *c.176T>C*

The patient is heterozygous for a common missense polymorphism in the ITGB3 gene which occurs at a frequency of 0.089% in the 1000 genomes project. OMIM reports 5 phenotypes associated with variants in the ITGB3 gene including Bleeding disorder (platelet-type) (16) (autosomal dominant), Glanzmann thrombasthenia, Purpura (posttransfusion), Thrombocytopenia (neonatal alloimmune), susceptibility to Myocardial infarction. This variant causes a nonsynonymous moderate amino acid substitution (p.L59P) which may alter protein function. ClinVar classifies this variant as non-pathogenic, pathogenic and other and reports an association with PL(A1)/(A2) ALLOANTIGEN POLYMORPHISM, Thrombocytopenia (neonatal alloimmune), Posttransfusion purpura, Myocardial infarction, Fracture (hip) (susceptibility to). This variant is predicted to be

tolerable by SIFT and benign by PolyPhen2.

#### *c.73G>A*

The patient is homozygous for a common missense polymorphism in the CST3 gene which occurs at a frequency of 0.21% in the 1000 genomes project. OMIM reports 2 phenotypes associated with variants in the CST3 gene including Cerebral amyloid angiopathy, Macular degeneration (age-related) (11). This variant causes a nonsynonymous moderate amino acid substitution (p.A25T) which may alter protein function. ClinVar classifies this variant as pathogenic and reports an association with Age-related macular degeneration 11. This variant is predicted to be tolerable by SIFT and benign by PolyPhen2.

#### *c.185T>C*

The patient is homozygous for a common missense polymorphism in the HEXB gene which occurs at a frequency of 0.98% in the 1000 genomes project. OMIM reports that variants in the HEXB gene are associated with Sandhoff disease (infantile) (juvenile) (and adult forms). This variant causes a nonsynonymous moderate amino acid substitution (p.L62S) which may alter protein function. ClinVar classifies this variant as pathogenic and reports an association with Sandhoff disease (infantile type). This variant is predicted to be tolerable by SIFT

#### *c.182G>A*

The patient is heterozygous for a common missense polymorphism in the BANK1 gene which occurs at a frequency of 0.22% in the 1000 genomes project. OMIM reports that variants in the BANK1 gene are associated with association with Systemic lupus erythematosus. This variant causes a nonsynonymous conservative amino acid substitution (p.R61H) which may alter protein function. ClinVar classifies this variant as pathogenic and reports an association with Systemic lupus erythematosus (association with). This variant is predicted to be tolerable by SIFT and benign by PolyPhen2.

#### *c.209G>A*

The patient is homozygous for a common missense polymorphism in the BBS2 gene which occurs at a frequency of 1.% in the 1000 genomes project. OMIM reports that variants in the BBS2 gene are associated with Bardet-Biedl syndrome 2. This variant causes a nonsynonymous conservative amino acid substitution (p.S70N) which may alter protein function. ClinVar classifies this variant as pathogenic and reports an association with Bardet-Biedl syndrome 2. This variant is predicted to be tolerable by SIFT

#### *c.230G>A*

The patient is heterozygous for a common missense polymorphism in the KLK1 gene which occurs at a frequency of 0.042% in the 1000 genomes project. OMIM reports that variants in the KLK1 gene are associated with [decreased urinary activity of Kallikrein]. This variant causes a nonsynonymous conservative amino acid substitution (p.R77H) which may alter protein function. ClinVar classifies this variant as pathogenic and reports an association with Kallikrein (decreased urinary activity of). This variant is predicted to be deleterious by SIFT and possibly deleterious by PolyPhen2.

#### *c.445G>A*

The patient is heterozygous for a common missense polymorphism in the NAT1 gene which occurs at a frequency of 0.017% in the 1000 genomes project. OMIM reports that variants in the NAT1 gene are associated with Orthostatic intolerance. This variant causes a nonsynonymous conservative amino acid substitution (p.V149I) which may alter protein function. ClinVar classifies this variant as pathogenic and reports an association with NAT1\*17 ALLELE. This variant is predicted to be tolerable by SIFT and benign by PolyPhen2.

#### *c.2621T>G*

The patient is homozygous for a common missense polymorphism in the ITGA2B gene which occurs at a frequency of 0.4% in the 1000 genomes project. OMIM reports 3 phenotypes associated with variants in the ITGA2B gene including Bleeding disorder (platelet-type) (16) (autosomal dominant), Glanzmann thrombasthenia, Thrombocytopenia (neonatal alloimmune) (BAK

antigen related). This variant causes a nonsynonymous moderate amino acid substitution (p.I874S) which may alter protein function. ClinVar classifies this variant as pathogenic and reports an association with Bak platelet-specific antigen. This variant is predicted to be tolerable by SIFT and benign by PolyPhen2.

## INTERPRETATION OF SECONDARY FINDINGS

---

### *c.7336G>T*

The patient is heterozygous for a rare mutation in the RYR1 gene which doesn't occur in the 1000 genomes project. OMIM reports 5 phenotypes associated with variants in the RYR1 gene including Central core disease, King-Denborough syndrome, Minicore myopathy with external ophthalmoplegia, Neuromuscular disease (congenital) (with uniform type 1 fiber), Malignant hyperthermia susceptibility 1. This variant causes a nonsynonymous severe amino acid substitution (p.G2446C) which may alter protein function. This variant is predicted to be deleterious by SIFT and benign by PolyPhen2.

### *c.2477C>A*

The patient is heterozygous for a rare missense mutation in the BRCA1 gene which occurs at a frequency of 0.0002% in the 1000 genomes project. OMIM reports 2 phenotypes associated with variants in the BRCA1 gene including Breast-ovarian cancer (familial) (1), susceptibility to Pancreatic cancer 4. This variant causes a nonsynonymous moderate amino acid substitution (p.T826K) which may alter protein function. ClinVar classifies this variant as non-pathogenic, unknown and other and reports an association with BRCA1 and BRCA2 Hereditary Breast and Ovarian Cancer, Familial cancer of breast, Breast-ovarian cancer (familial 1). ARUP classifies this variant as 1 - Not pathogenic or of no clinical significance. Invitae classifies this variant as Benign. This variant is predicted to be deleterious by SIFT and deleterious by PolyPhen2.

### *c.64G>A*

The patient is heterozygous for a common missense polymorphism in the MUTYH gene which occurs at a frequency of 0.02% in the 1000 genomes project. OMIM reports 3 phenotypes associated with variants in the MUTYH gene including Adenomas (multiple colorectal), Colorectal adenomatous polyposis (autosomal recessive) (with pilomatricomas), Gastric cancer (somatic). This variant causes a nonsynonymous conservative amino acid substitution (p.V22M) which may alter protein function. ClinVar classifies this variant as non-pathogenic and reports an association with , not specified, MYH-associated polyposis, Neoplastic Syndromes (Hereditary). Invitae classifies this variant as Benign. This variant is predicted to be deleterious by SIFT and possibly deleterious by PolyPhen2.

### *c.1531A>G*

The patient is heterozygous for a common missense polymorphism in the PMS2 gene which occurs at a frequency of 0.011% in the 1000 genomes project. OMIM reports 2 phenotypes associated with variants in the PMS2 gene including Colorectal cancer (hereditary nonpolyposis) (type 4), Mismatch repair cancer syndrome. This variant causes a nonsynonymous moderate amino acid substitution (p.T511A) which may alter protein function. ClinVar classifies this variant as non-pathogenic and untested and reports an association with , Lynch syndrome, not specified, Neoplastic Syndromes (Hereditary). Invitae classifies this variant as Benign. This variant is predicted to be tolerable by SIFT and benign by PolyPhen2.

### *c.1067A>G*

The patient is heterozygous for a common missense polymorphism in the BRCA1 gene which occurs at a frequency of 0.022% in the 1000 genomes project. OMIM reports 2 phenotypes associated with variants in the BRCA1 gene including Breast-ovarian cancer (familial) (1), susceptibility to Pancreatic cancer 4. This variant causes a nonsynonymous conservative amino acid substitution (p.Q256D) which may alter protein function. ClinVar classifies this variant as non-

acid substitution (p.Q550K) which may alter protein function. ClinVar classifies this variant as not pathogenic, other and untested and reports an association with , BRCA1 and BRCA2 Hereditary Breast and Ovarian Cancer, Breast-ovarian cancer (familial 1), not specified, Neoplastic Syndromes (Hereditary). ARUP classifies this variant as 1 - Not pathogenic or of no clinical significance. Invitae classifies this variant as Benign. This variant is predicted to be deleterious by SIFT and deleterious by PolyPhen2.

#### *c.371A>G*

The patient is homozygous for a common missense polymorphism in the SDHD gene which occurs at a frequency of 0.95% in the 1000 genomes project. OMIM reports 6 phenotypes associated with variants in the SDHD gene including Carcinoid tumors (intestinal), Cowden syndrome 3, Merkel cell carcinoma (somatic), Paraganglioma and gastric stromal sarcoma, Paragangliomas 1 (with or without deafness), Pheochromocytoma. This variant causes a nonsynonymous conservative amino acid substitution (p.Q124R) which may alter protein function. This variant is predicted to be tolerable by SIFT

#### *c.1415G>A*

The patient is homozygous for a common missense polymorphism in the FBN1 gene which occurs at a frequency of 1.% in the 1000 genomes project. OMIM reports 8 phenotypes associated with variants in the FBN1 gene including Acromioclavicular dysplasia, Aortic aneurysm (ascending) (and dissection), Ectopia lentis (familial), Geleophysic dysplasia 2, MASS syndrome, Marfan syndrome, Stiff skin syndrome, Weill-Marchesani syndrome 2 (dominant). This variant causes a nonsynonymous severe amino acid substitution (p.C472Y) which may alter protein function. This variant is predicted to be tolerable by SIFT and benign by PolyPhen2.

#### *c.1673A>G*

The patient is heterozygous for a common missense polymorphism in the SCN5A gene which occurs at a frequency of 0.23% in the 1000 genomes project. OMIM reports 9 phenotypes associated with variants in the SCN5A gene including Atrial fibrillation (familial) (10), Brugada syndrome 1, Cardiomyopathy (dilated) (1E), Heart block (nonprogressive), Heart block (progressive) (type IA), Long QT syndrome-3, Sick sinus syndrome 1, Ventricular fibrillation (familial) (1), susceptibility to Sudden infant death syndrome. This variant causes a nonsynonymous conservative amino acid substitution (p.H558R) which may alter protein function. ClinVar classifies this variant as pathogenic and non-pathogenic and reports an association with Progressive familial heart block type 1A, not specified. This variant is predicted to be tolerable by SIFT and benign by PolyPhen2.

#### *c.2326A>G*

The patient is heterozygous for a common missense polymorphism in the DSC2 gene which occurs at a frequency of 0.2% in the 1000 genomes project. OMIM reports 2 phenotypes associated with variants in the DSC2 gene including Arrhythmogenic right ventricular dysplasia 11 with mild palmoplantar keratoderma and woolly hair, Arrhythmogenic right ventricular dysplasia 11. This variant causes a nonsynonymous conservative amino acid substitution (p.I776V) which may alter protein function. ClinVar classifies this variant as non-pathogenic and reports an association with not specified. This variant is predicted to be tolerable by SIFT and benign by PolyPhen2.

#### *c.1853C>T*

The patient is heterozygous for a common missense polymorphism in the APOB gene which occurs at a frequency of 0.48% in the 1000 genomes project. OMIM reports 2 phenotypes associated with variants in the APOB gene including Hypercholesterolemia (due to ligand-defective apo B), Hypobetalipoproteinemia. This variant causes a nonsynonymous moderate amino acid substitution (p.A618V) which may alter protein function. ClinVar classifies this variant as probable-non-pathogenic and reports an association with not specified. This variant is predicted to be tolerable by SIFT and deleterious by PolyPhen2.

#### *c.215C>G*

The patient is heterozygous for a common missense polymorphism in the TP53 gene which occurs at a frequency of 0.54% in the 1000 genomes project. OMIM reports 11 phenotypes associated with

variants in the TP53 gene including Adrenal cortical carcinoma, Breast cancer, Choroid plexus papilloma, Colorectal cancer, Hepatocellular carcinoma, Li-Fraumeni syndrome, Nasopharyngeal carcinoma, Osteosarcoma, Pancreatic cancer, Basal cell carcinoma 7, Glioma susceptibility 1. This variant causes a nonsynonymous moderate amino acid substitution (p.P72R) which may alter protein function. ClinVar classifies this variant as non-pathogenic and reports an association with CODON 72 POLYMORPHISM ( ) (rs1042522), , not specified, Neoplastic Syndromes ( Hereditary). This variant is predicted to be tolerable by SIFT and possibly deleterious by PolyPhen2.

#### *c.7397T>C*

The patient is homozygous for a common missense polymorphism in the BRCA2 gene which occurs at a frequency of 0.98% in the 1000 genomes project. OMIM reports 9 phenotypes associated with variants in the BRCA2 gene including Fanconi anemia (complementation group D1), Pancreatic cancer, Prostate cancer, Wilms tumor, susceptibility to Breast cancer (male), Breast-ovarian cancer (familial) (2), Glioblastoma 3, Medulloblastoma, Pre-B-cell acute lymphoblastic leukemia. This variant causes a nonsynonymous moderate amino acid substitution (p.V2466A) which may alter protein function. ClinVar classifies this variant as untested, unknown and non-pathogenic and reports an association with Familial cancer of breast, Breast-ovarian cancer (familial 2), not specified. This variant is predicted to be tolerable by SIFT

#### *c.1014G>C*

The patient is heterozygous for a common missense polymorphism in the MUTYH gene which occurs at a frequency of 0.31% in the 1000 genomes project. OMIM reports 3 phenotypes associated with variants in the MUTYH gene including Adenomas (multiple colorectal), Colorectal adenomatous polyposis (autosomal recessive) (with pilomatricomas), Gastric cancer (somatic). This variant causes a nonsynonymous conservative amino acid substitution (p.Q338H) which may alter protein function. ClinVar classifies this variant as non-pathogenic and reports an association with , not specified, Neoplastic Syndromes ( Hereditary). This variant is predicted to be tolerable by SIFT and possibly deleterious by PolyPhen2.

#### *c.1636A>G*

The patient is homozygous for a common missense polymorphism in the MEN1 gene which occurs at a frequency of 0.83% in the 1000 genomes project. OMIM reports 6 phenotypes associated with variants in the MEN1 gene including Adrenal adenoma (somatic), Angiofibroma (somatic), Carcinoid tumor of lung, Lipoma (somatic), Multiple endocrine neoplasia 1, Parathyroid adenoma (somatic). This variant causes a nonsynonymous moderate amino acid substitution (p.T546A) which may alter protein function. ClinVar classifies this variant as non-pathogenic and reports an association with , not specified. This variant is predicted to be tolerable by SIFT and benign by PolyPhen2.

#### *c.2318G>A*

The patient is heterozygous for a common missense polymorphism in the DSG2 gene which occurs at a frequency of 0.24% in the 1000 genomes project. OMIM reports 2 phenotypes associated with variants in the DSG2 gene including Arrhythmogenic right ventricular dysplasia 10, Cardiomyopathy (dilated) (1BB). This variant causes a nonsynonymous conservative amino acid substitution (p.R773K) which may alter protein function. ClinVar classifies this variant as non-pathogenic and reports an association with not specified. This variant is predicted to be tolerable by SIFT and benign by PolyPhen2.

#### *c.5465T>A*

The patient is heterozygous for a common missense polymorphism in the APC gene which occurs at a frequency of 0.87% in the 1000 genomes project. OMIM reports 8 phenotypes associated with variants in the APC gene including Adenoma (periampullary) (somatic), Adenomatous polyposis coli, Brain tumor-polyposis syndrome 2, Colorectal cancer (somatic), Desmoid disease (hereditary), Gardner syndrome, Gastric cancer (somatic), Hepatoblastoma (somatic). This variant causes a nonsynonymous severe amino acid substitution (p.V1822D) which may alter protein function. ClinVar classifies this variant as non-pathogenic and other and reports an association with Adenomatous

classifies this variant as non-pathogenic and other and reports an association with Adenomatous polyposis coli, , not specified, Familial colorectal cancer, Neoplastic Syndromes ( Hereditary). This variant is predicted to be benign by PolyPhen2.

#### *c.1621A>G*

The patient is homozygous for a common missense polymorphism in the PMS2 gene which occurs at a frequency of 0.88% in the 1000 genomes project. OMIM reports 2 phenotypes associated with variants in the PMS2 gene including Colorectal cancer (hereditary nonpolyposis) (type 4), Mismatch repair cancer syndrome. This variant causes a nonsynonymous moderate amino acid substitution (p.K541E) which may alter protein function. ClinVar classifies this variant as non-pathogenic and reports an association with Lynch syndrome. This variant is predicted to be tolerable by SIFT and benign by PolyPhen2.

#### *c.4059T>G*

The patient is homozygous for a common missense polymorphism in the COL3A1 gene which occurs at a frequency of 1.% in the 1000 genomes project. OMIM reports 2 phenotypes associated with variants in the COL3A1 gene including Ehlers-Danlos syndrome (type III), Ehlers-Danlos syndrome (type IV). This variant causes a nonsynonymous conservative amino acid substitution (p.H1353Q) which may alter protein function. This variant is predicted to be tolerable by SIFT and benign by PolyPhen2.

#### *c.1114A>C*

The patient is heterozygous for a common missense polymorphism in the BRCA2 gene which occurs at a frequency of 0.25% in the 1000 genomes project. OMIM reports 9 phenotypes associated with variants in the BRCA2 gene including Fanconi anemia (complementation group D1), Pancreatic cancer, Prostate cancer, Wilms tumor, susceptibility to Breast cancer (male), Breast-ovarian cancer (familial) (2), Glioblastoma 3, Medulloblastoma, Pre-B-cell acute lymphoblastic leukemia. This variant causes a nonsynonymous moderate amino acid substitution (p.N372H) which may alter protein function. ClinVar classifies this variant as other, non-pathogenic and untested and reports an association with Breast-ovarian cancer ( familial 2), , not specified, Neoplastic Syndromes ( Hereditary). This variant is predicted to be tolerable by SIFT

#### *c.1486C>G*

The patient is homozygous for a common missense polymorphism in the MYLK gene which occurs at a frequency of 1.% in the 1000 genomes project. OMIM reports that variants in the MYLK gene are associated with Aortic aneurysm (familial thoracic 7). This variant causes a nonsynonymous conservative amino acid substitution (p.L496V) which may alter protein function. This variant is predicted to be tolerable by SIFT and benign by PolyPhen2.

## RECOMMENDATIONS

---

Genetic counseling of the family is recommended to discuss the implications of this report.  
[Additional recommendations.]

## METHODS AND LIMITATIONS

---

This report is a sample to be used solely for the purpose of evaluating functionality of the Tute Platform and should not be used in any clinical application.

### Sequencing and Variant Detection

Whole exome sequencing was performed by solution-based hybridization which enriches for coding exons targeting DNA with specific baits. Sequencing was performed using the Illumina HiSeq 2500 to a minimum average exome depth of 90X. Sequencing reads were aligned to the reference genome (hg19) by BWA-MEM and variants were called using FreeBayes.

### Variant Analysis and Report Generation

Reported variants were analyzed using the Tute platform to identify those variants which are reported by medical literature to be pathogenic. All non-synonymous variants of allele frequency <1% reported by the 1000 genomes project and annotated as 'Pathogenic' or 'Probably Pathogenic' by ClinVar are reported in the table 'Primary/Diagnostic Sequence Variant(s) Detected'. Careful correlation of these variants with the clinical indications for the proband should be conducted by an experience medical geneticist to verify that reported findings are consistent with reported clinical phenotypes. Additionally, variants are included based on ACMG guidelines for the reporting of incidental findings in the table 'Secondary/Incidental Sequence Variant(s) Detected'.

### Validation of reported findings

Variants of interest should be confirmed by Sanger sequencing. The DNA immediately flanking each of these variants should be amplified genomic DNA followed by sequencing in both directions using fluorescent dideoxy sequencing.

### Limitations

Absence of a primary diagnostic finding identified by this test does not exclude the possibility of a genetic basis for the clinical condition for this proband. Certain genetic abnormalities are not detectable by the technologies used to generate this report. Specifically, detection of abnormal variants depends on the presence of these sequence variants in the sequencing data. This exome sequence test is designed to evaluate single nucleotide variants within the human exome; however, this technology is only able to sequence 90-95% of the human reference to the requisite 10-fold coverage needed for reliable detection of heterozygous variants.

Additionally, certain types of genetic abnormalities are difficult to identify in sequencing data and have not been validated for clinical use including insertions, deletions, copy number alterations, long repetitive sequences, triplet repeat expansions, chromosomal rearrangements, polyploidy, repetitive regions including mono-, di- and tri-nucleotide repeats, GX rich regions, intronic variants outside the splice-site and epigenetic effects.

Variants believed to be benign based on medical literature, or with population frequencies greater than or equal to 1%, or resulting in synonymous amino acid changes, or occurring in 5' or 3' untranslated regions are generally not reported.

This report is a sample to be used solely for the purpose of evaluating functionality of the Tute Platform and should not be used in any clinical application.

## Sources

---

### REPORT SIGNATURES

---

Online Mendelian Inheritance in Man, OMIM (TM). Retrieved 0/26/2015 from <http://www.ncbi.nlm.nih.gov/omim/>  
ClinVar. Retrieved 0/26/2015 from <http://www.ncbi.nlm.nih.gov/clinvar/>



**ORDERING PROVIDER**

,

**SPECIMEN**

Collection Date:

Received Date:

Report Date:

**PATIENT**

Name:

Date of Birth:

Patient ID:

Gender:

Clinical Indication:

---

[Detailed clinical description.]

**TEST RESULTS SUMMARY**

---

Primary Result(s): [Findings related to clinical indication.]

Incidental/Secondary Result(s): [Incidental findings.]

PRIMARY/DIAGNOSTIC SEQUENCE VARIANT(S) DETECTED

| Gene   | Nucleotide Change | Protein Change | Zygoty | Tute Dx                                                                               |
|--------|-------------------|----------------|--------|---------------------------------------------------------------------------------------|
| HFE    | c.845G>A          | p.C282Y        | hom    | Hereditary hemochromatosis Hemochromatosis, juvenile, digenic                         |
| CTH    | c.200C>T          | p.T67I         | het    | Cystathioninuria                                                                      |
| CFTR   | c.224G>A          | p.R75Q         | het    | Hereditary pancreatitis;Cystic fibrosis                                               |
| NTRK1  | c.1810C>T         | p.H604Y        | het    | Familial medullary thyroid carcinoma Hereditary insensitivity to pain with anhidrosis |
| BRIP1  | c.139C>G          | p.P47A         | het    | Breast cancer, early-onset                                                            |
| F5     | c.1601A>G         | p.Q534R        | het    | Thrombophilia due to factor V Leiden                                                  |
| DPYD   | c.85C>T           | p.R29C         | hom    | Dihydropyrimidine dehydrogenase deficiency;not provided                               |
| PRSS1  | c.86A>T           | p.N29I         | het    | Hereditary pancreatitis;Hereditary pancreatitis                                       |
| FUT2   | c.461G>A          | p.W154X        | hom    | Norwalk virus infection, resistance to                                                |
| CYP2D6 | c.506-1G>A        | .              | het    | Debrisoquine, poor metabolism of                                                      |
| PRSS1  | c.47C>T           | p.A16V         | het    | Hereditary pancreatitis                                                               |
| NTRK1  | c.1838G>T         | p.G613V        | het    | Familial medullary thyroid carcinoma Hereditary insensitivity to pain with anhidrosis |
| PRSS1  | c.161A>G          | p.N54S         | het    | Hereditary pancreatitis                                                               |
| FGFR4  | c.1162G>A         | p.G388R        | het    | Cancer progression and tumor cell motility                                            |
| CYP2B6 | c.785A>G          | p.K262R        | het    | Efavirenz, poor metabolism of                                                         |
| ITGB3  | c.176T>C          | p.L59P         | het    | Thrombocytopenia, neonatal alloimmune Posttransfusion purpura                         |
| TIRAP  | c.539C>T          | p.S180L        | het    | Malaria, resistance to BACTEREMIA, RESISTANCE TO                                      |
| CST3   | c.73G>A           | p.A25T         | het    | Age-related macular degeneration 11                                                   |
| HEXB   | c.185T>C          | p.L62S         | hom    | Sandhoff disease, infantile type                                                      |
| BANK1  | c.182G>A          | p.R61H         | het    | Systemic lupus erythmatosus, association with                                         |

## SECONDARY/INCIDENTAL SEQUENCE VARIANT(S) DETECTED

The American College of Medical Genetics and Genomics (ACMG) recently published a policy statement on clinical sequencing that emphasizes the possibility of recognizing and reporting incidental or secondary findings of medical value when conducting exome and genome sequencing. The ACMG recommends that laboratories performing clinical sequencing seek and report mutations of specified classes or types in the genes listed within the guidelines. This section of the report describes variants which fit the criteria outlined by ACMG for the reporting of incidental or secondary findings.

| Gene    | Nucleotide Change | Protein Change | Zygoty | Tute Dx                          |
|---------|-------------------|----------------|--------|----------------------------------|
| MUTYH   | c.1276C>T         | p.R426C        | het    | Adenomatous polyposis coli       |
| SDHD    | c.371A>G          | p.Q124R        | hom    | .                                |
| CACNA1S | c.5399T>C         | p.L1800S       | het    | .                                |
| FBN1    | c.1415G>A         | p.C472Y        | hom    | .                                |
| BRCA2   | c.7397T>C         | p.V2466A       | hom    | Breast cancer                    |
| MUTYH   | c.1014G>C         | p.Q338H        | het    | .                                |
| MEN1    | c.1636A>G         | p.T546A        | hom    | .                                |
| BRCA1   | c.2612C>T         | p.P871L        | het    | .                                |
| DSG2    | c.2318G>A         | p.R773K        | het    | .                                |
| APC     | c.5465T>A         | p.V1822D       | hom    | .                                |
| PMS2    | c.1621A>G         | p.K541E        | hom    | Colorectal cancer, non-polyposis |
| COL3A1  | c.4059T>G         | p.H1353Q       | hom    | .                                |
| BRCA1   | c.2077G>A         | p.D693N        | het    | .                                |
| BRCA2   | c.1114A>C         | p.N372H        | het    | .                                |
| MYLK    | c.1486C>G         | p.L496V        | hom    | .                                |
| PCSK9   | c.1420G>A         | p.V474I        | hom    | .                                |
| APOB    | c.13013G>A        | p.S4338N       | hom    | .                                |
| PCSK9   | c.2009G>A         | p.G670E        | hom    | .                                |
| DSC2    | c.2393G>A         | p.R798Q        | het    | .                                |
| APOB    | c.6937A>G         | p.I2313V       | hom    | .                                |

## INTERPRETATION OF PRIMARY FINDINGS

### *c.845G>A*

The patient is homogeneous for a common missense polymorphism in the HFE gene which occurs at a frequency of 0.013% in the 1000 genomes project. OMIM reports 6 phenotypes associated with variants in the HFE gene including Hemochromatosis, [Transferrin serum level QTL2], susceptibility to Alzheimer disease, Microvascular complications of diabetes 7, susceptibility to Porphyria cutanea tarda, susceptibility to Porphyria variegata. This variant causes a nonsynonymous severe amino acid substitution (p.C282Y) which may alter protein function. ClinVar classifies this variant as pathogenic, other and non-pathogenic and reports an association with Hereditary

hemochromatosis, Porphyria cutanea tarda (susceptibility to), Porphyria variegata (susceptibility to), Hemochromatosis (juvenile) (digenic), Alzheimer disease (susceptibility to), Transferrin serum level quantitative trait locus 2, Microvascular complications of diabetes 7, not specified. This variant is predicted to be deleterious by SIFT and deleterious by PolyPhen2.

#### *c.200C>T*

The patient is heterozygous for a common missense polymorphism in the CTH gene which occurs at a frequency of 0.0026% in the 1000 genomes project. OMIM reports 2 phenotypes associated with variants in the CTH gene including Cystathioninuria, Homocysteine (total plasma) (elevated). This variant causes a nonsynonymous moderate amino acid substitution (p.T67I) which may alter protein function. ClinVar classifies this variant as pathogenic and reports an association with Cystathioninuria. This variant is predicted to be deleterious by SIFT and deleterious by PolyPhen2.

#### *c.224G>A*

The patient is heterozygous for a common missense polymorphism in the CFTR gene which occurs at a frequency of 0.0064% in the 1000 genomes project. OMIM reports 6 phenotypes associated with variants in the CFTR gene including Congenital bilateral absence of vas deferens, Cystic fibrosis, Sweat chloride elevation without CF, modifier of Bronchiectasis with or without elevated sweat chloride 1, Hypertrypsinemia (neonatal), Pancreatitis (idiopathic). This variant causes a nonsynonymous conservative amino acid substitution (p.R75Q) which may alter protein function. ClinVar classifies this variant as probable-non-pathogenic, unknown, non-pathogenic and pathogenic and reports an association with Cystic fibrosis, , not specified, Hereditary pancreatitis;Cystic fibrosis. This variant is predicted to be deleterious by SIFT and deleterious by PolyPhen2.

#### *c.1810C>T*

The patient is heterozygous for a common missense polymorphism in the NTRK1 gene which occurs at a frequency of 0.024% in the 1000 genomes project. OMIM reports 2 phenotypes associated with variants in the NTRK1 gene including Insensitivity to pain (congenital) (with anhidrosis), Medullary thyroid carcinoma (familial). This variant causes a nonsynonymous moderate amino acid substitution (p.H604Y) which may alter protein function. ClinVar classifies this variant as pathogenic and non-pathogenic and reports an association with Familial medullary thyroid carcinoma, Hereditary insensitivity to pain with anhidrosis, Hereditary insensitivity to pain with anhidrosis. This variant is predicted to be deleterious by SIFT and deleterious by PolyPhen2.

#### *c.139C>G*

The patient is heterozygous for a rare missense mutation in the BRIP1 gene which doesn't occur in the 1000 genomes project. OMIM reports 2 phenotypes associated with variants in the BRIP1 gene including Breast cancer (early-onset), Fanconi anemia (complementation group J). This variant causes a nonsynonymous conservative amino acid substitution (p.P47A) which may alter protein function. ClinVar classifies this variant as pathogenic and other and reports an association with Breast cancer (early-onset), Neoplastic Syndromes (Hereditary). This variant is predicted to be deleterious by PolyPhen2.

#### *c.1601A>G*

The patient is heterozygous for a common missense polymorphism in the F5 gene which occurs at a frequency of 0.99% in the 1000 genomes project. OMIM reports 6 phenotypes associated with variants in the F5 gene including Factor V deficiency, Thrombophilia due to activated protein C resistance, Budd-Chiari syndrome, susceptibility to Pregnancy loss recurrent 1, susceptibility to Stroke (ischemic), susceptibility to Thrombophilia due to factor V Leiden. This variant causes a nonsynonymous conservative amino acid substitution (p.Q534R) which may alter protein function. ClinVar classifies this variant as pathogenic, untested and other and reports an association with Thrombophilia due to factor V Leiden, Ischemic stroke (susceptibility to), Budd-Chiari syndrome (susceptibility to), Recurrent abortion. This variant is predicted to be tolerable by SIFT

#### *c.85C>T*

The patient is homozygous for a common missense polymorphism in the DPYD gene which occurs at a frequency of 0.74% in the 1000 genomes project. OMIM reports 2 phenotypes

occurs at a frequency of 0.74% in the 1000 genomes project. OMIM reports 2 phenotypes associated with variants in the DPYD gene including 5-fluorouracil toxicity, Dihydropyrimidine dehydrogenase deficiency. This variant causes a nonsynonymous severe amino acid substitution (p.R29C) which may alter protein function. ClinVar classifies this variant as pathogenic and reports an association with Dihydropyrimidine dehydrogenase deficiency;. This variant is predicted to be tolerable by SIFT and deleterious by PolyPhen2.

#### *c.86A>T*

The patient is heterozygous for a common missense polymorphism in the PRSS1 gene which doesn't occur in the 1000 genomes project. OMIM reports 2 phenotypes associated with variants in the PRSS1 gene including Pancreatitis (hereditary), Trypsinogen deficiency. This variant causes a nonsynonymous moderate amino acid substitution (p.N29I) which may alter protein function. ClinVar classifies this variant as pathogenic and reports an association with Hereditary pancreatitis;Hereditary pancreatitis. This variant is predicted to be deleterious by SIFT and benign by PolyPhen2.

#### *c.461G>A*

The patient is homozygous for a common nonsense polymorphism in the FUT2 gene which occurs at a frequency of 0.32% in the 1000 genomes project. OMIM reports 3 phenotypes associated with variants in the FUT2 gene including [Bombay phenotype], resistance to Norwalk virus infection, Vitamin B12 plasma level QTL1. This variant introduces a premature stop codon which may lead to early termination of protein transcription. ClinVar classifies this variant as non-pathogenic, pathogenic and other and reports an association with SECRETOR/NONSECRETOR POLYMORPHISM, Norwalk virus infection ( resistance to), Vitamin b12 plasma level quantitative trait locus 1. This variant is predicted to be tolerable by SIFT

#### *c.506-1G>A*

The patient is heterozygous for a common polymorphism in the CYP2D6 gene which occurs at a frequency of 0.093% in the 1000 genomes project. OMIM reports 2 phenotypes associated with variants in the CYP2D6 gene including Codeine sensitivity, Debrisoquine sensitivity. ClinVar classifies this variant as pathogenic and reports an association with Debrisoquine ( poor metabolism of).

#### *c.47C>T*

The patient is heterozygous for a common missense polymorphism in the PRSS1 gene which doesn't occur in the 1000 genomes project. OMIM reports 2 phenotypes associated with variants in the PRSS1 gene including Pancreatitis (hereditary), Trypsinogen deficiency. This variant causes a nonsynonymous moderate amino acid substitution (p.A16V) which may alter protein function. ClinVar classifies this variant as pathogenic and reports an association with Hereditary pancreatitis. This variant is predicted to be tolerable by SIFT and benign by PolyPhen2.

#### *c.1838G>T*

The patient is heterozygous for a common missense polymorphism in the NTRK1 gene which occurs at a frequency of 0.023% in the 1000 genomes project. OMIM reports 2 phenotypes associated with variants in the NTRK1 gene including Insensitivity to pain (congenital) (with anhidrosis), Medullary thyroid carcinoma (familial). This variant causes a nonsynonymous moderate amino acid substitution (p.G613V) which may alter protein function. ClinVar classifies this variant as pathogenic and non-pathogenic and reports an association with Familial medullary thyroid carcinoma, Hereditary insensitivity to pain with anhidrosis, Hereditary insensitivity to pain with anhidrosis. This variant is predicted to be tolerable by SIFT and possibly deleterious by PolyPhen2.

#### *c.161A>G*

The patient is heterozygous for a common missense polymorphism in the PRSS1 gene which doesn't occur in the 1000 genomes project. OMIM reports 2 phenotypes associated with variants in the PRSS1 gene including Pancreatitis (hereditary), Trypsinogen deficiency. This variant causes a nonsynonymous conservative amino acid substitution (p.N54S) which may alter protein function. ClinVar classifies this variant as pathogenic and reports an association with Hereditary pancreatitis. This variant is predicted to be tolerable by SIFT and benign by PolyPhen2.

This variant is predicted to be tolerable by SIFT and benign by PolyPhen2.

#### *c.1162G>A*

The patient is heterozygous for a common missense polymorphism in the FGFR4 gene which occurs at a frequency of 0.3% in the 1000 genomes project. OMIM reports that variants in the FGFR4 gene are associated with Cancer progression/metastasis. This variant causes a nonsynonymous moderate amino acid substitution (p.G388R) which may alter protein function. ClinVar classifies this variant as pathogenic and reports an association with Cancer progression and tumor cell motility. This variant is predicted to be deleterious by SIFT and deleterious by PolyPhen2.

#### *c.785A>G*

The patient is heterozygous for a common missense polymorphism in the CYP2B6 gene which doesn't occur in the 1000 genomes project. OMIM reports 2 phenotypes associated with variants in the CYP2B6 gene including poor metabolism of Efavirenz, susceptibility to Efavirenz central nervous system toxicity. This variant causes a nonsynonymous conservative amino acid substitution (p.K262R) which may alter protein function. ClinVar classifies this variant as pathogenic and reports an association with Efavirenz (poor metabolism of). This variant is predicted to be tolerable by SIFT and benign by PolyPhen2.

#### *c.176T>C*

The patient is heterozygous for a common missense polymorphism in the ITGB3 gene which occurs at a frequency of 0.089% in the 1000 genomes project. OMIM reports 5 phenotypes associated with variants in the ITGB3 gene including Bleeding disorder (platelet-type) (16) (autosomal dominant), Glanzmann thrombasthenia, Purpura (posttransfusion), Thrombocytopenia (neonatal alloimmune), susceptibility to Myocardial infarction. This variant causes a nonsynonymous moderate amino acid substitution (p.L59P) which may alter protein function. ClinVar classifies this variant as non-pathogenic, pathogenic and other and reports an association with PL(A1)/(A2) ALLOANTIGEN POLYMORPHISM, Thrombocytopenia (neonatal alloimmune), Posttransfusion purpura, Myocardial infarction, Fracture (hip) (susceptibility to). This variant is predicted to be tolerable by SIFT and benign by PolyPhen2.

#### *c.539C>T*

The patient is heterozygous for a common missense polymorphism in the TIRAP gene which occurs at a frequency of 0.086% in the 1000 genomes project. OMIM reports 4 phenotypes associated with variants in the TIRAP gene including protection against Bacteremia, protection against Malaria, protection against Pneumococcal disease (invasive), protection against Tuberculosis. This variant causes a nonsynonymous moderate amino acid substitution (p.S180L) which may alter protein function. ClinVar classifies this variant as other and pathogenic and reports an association with Invasive pneumococcal disease (protection against), Malaria (resistance to), Mycobacterium tuberculosis (protection against), BACTEREMIA (RESISTANCE TO). This variant is predicted to be possibly deleterious by PolyPhen2.

#### *c.73G>A*

The patient is heterozygous for a common missense polymorphism in the CST3 gene which occurs at a frequency of 0.21% in the 1000 genomes project. OMIM reports 2 phenotypes associated with variants in the CST3 gene including Cerebral amyloid angiopathy, Macular degeneration (age-related) (11). This variant causes a nonsynonymous moderate amino acid substitution (p.A25T) which may alter protein function. ClinVar classifies this variant as pathogenic and reports an association with Age-related macular degeneration 11. This variant is predicted to be tolerable by SIFT and benign by PolyPhen2.

#### *c.185T>C*

The patient is homozygous for a common missense polymorphism in the HEXB gene which occurs at a frequency of 0.98% in the 1000 genomes project. OMIM reports that variants in the HEXB gene are associated with Sandhoff disease (infantile) (juvenile) (and adult forms). This variant causes a nonsynonymous moderate amino acid substitution (p.L62S) which may alter protein function. ClinVar classifies this variant as pathogenic and reports an association with Sandhoff

disease ( infantile type). This variant is predicted to be tolerable by SIFT

#### *c.182G>A*

The patient is heterozygous for a common missense polymorphism in the BANK1 gene which occurs at a frequency of 0.22% in the 1000 genomes project. OMIM reports that variants in the BANK1 gene are associated with association with Systemic lupus erythematosus. This variant causes a nonsynonymous conservative amino acid substitution (p.R61H) which may alter protein function. ClinVar classifies this variant as pathogenic and reports an association with Systemic lupus erythematosus ( association with). This variant is predicted to be tolerable by SIFT and benign by PolyPhen2.

### INTERPRETATION OF SECONDARY FINDINGS

---

#### *c.1276C>T*

The patient is heterozygous for a rare missense mutation in the MUTYH gene which doesn't occur in the 1000 genomes project. OMIM reports 3 phenotypes associated with variants in the MUTYH gene including Adenomas (multiple colorectal), Colorectal adenomatous polyposis (autosomal recessive) (with pilomatricomas), Gastric cancer (somatic). This variant causes a nonsynonymous severe amino acid substitution (p.R426C) which may alter protein function. ClinVar classifies this variant as unknown and other and reports an association with , Neoplastic Syndromes ( Hereditary), MYH-associated polyposis. Invitae classifies this variant as Variant of uncertain significance. This variant is predicted to be tolerable by SIFT and deleterious by PolyPhen2.

#### *c.371A>G*

The patient is homozygous for a common missense polymorphism in the SDHD gene which occurs at a frequency of 0.95% in the 1000 genomes project. OMIM reports 6 phenotypes associated with variants in the SDHD gene including Carcinoid tumors (intestinal), Cowden syndrome 3, Merkel cell carcinoma (somatic), Paraganglioma and gastric stromal sarcoma, Paragangliomas 1 (with or without deafness), Pheochromocytoma. This variant causes a nonsynonymous conservative amino acid substitution (p.Q124R) which may alter protein function. This variant is predicted to be tolerable by SIFT

#### *c.5399T>C*

The patient is heterozygous for a common missense polymorphism in the CACNA1S gene which occurs at a frequency of 0.23% in the 1000 genomes project. OMIM reports 3 phenotypes associated with variants in the CACNA1S gene including Hypokalemic periodic paralysis (type 1), Malignant hyperthermia susceptibility 5, susceptibility to Thyrotoxic periodic paralysis 1. This variant causes a nonsynonymous moderate amino acid substitution (p.L1800S) which may alter protein function. This variant is predicted to be deleterious by SIFT and deleterious by PolyPhen2.

#### *c.1415G>A*

The patient is homozygous for a common missense polymorphism in the FBN1 gene which occurs at a frequency of 1.% in the 1000 genomes project. OMIM reports 8 phenotypes associated with variants in the FBN1 gene including Acromicric dysplasia, Aortic aneurysm (ascending) (and dissection), Ectopia lentis (familial), Geleophysic dysplasia 2, MASS syndrome, Marfan syndrome, Stiff skin syndrome, Weill-Marchesani syndrome 2 (dominant). This variant causes a nonsynonymous severe amino acid substitution (p.C472Y) which may alter protein function. This variant is predicted to be tolerable by SIFT and benign by PolyPhen2.

#### *c.7397T>C*

The patient is homozygous for a common missense polymorphism in the BRCA2 gene which occurs at a frequency of 0.98% in the 1000 genomes project. OMIM reports 9 phenotypes associated with variants in the BRCA2 gene including Fanconi anemia (complementation group D1), Pancreatic cancer, Prostate cancer, Wilms tumor, susceptibility to Breast cancer (male), Breast-

ovarian cancer (familial) (2), Glioblastoma 3, Medulloblastoma, Pre-B-cell acute lymphoblastic leukemia. This variant causes a nonsynonymous moderate amino acid substitution (p.V2466A) which may alter protein function. ClinVar classifies this variant as untested, unknown and non-pathogenic and reports an association with Familial cancer of breast, Breast-ovarian cancer (familial 2), not specified. This variant is predicted to be tolerable by SIFT

#### *c.1014G>C*

The patient is heterozygous for a common missense polymorphism in the MUTYH gene which occurs at a frequency of 0.31% in the 1000 genomes project. OMIM reports 3 phenotypes associated with variants in the MUTYH gene including Adenomas (multiple colorectal), Colorectal adenomatous polyposis (autosomal recessive) (with pilomatricomas), Gastric cancer (somatic). This variant causes a nonsynonymous conservative amino acid substitution (p.Q338H) which may alter protein function. ClinVar classifies this variant as non-pathogenic and reports an association with , not specified, Neoplastic Syndromes ( Hereditary). This variant is predicted to be tolerable by SIFT and possibly deleterious by PolyPhen2.

#### *c.1636A>G*

The patient is homozygous for a common missense polymorphism in the MEN1 gene which occurs at a frequency of 0.83% in the 1000 genomes project. OMIM reports 6 phenotypes associated with variants in the MEN1 gene including Adrenal adenoma (somatic), Angiofibroma (somatic), Carcinoid tumor of lung, Lipoma (somatic), Multiple endocrine neoplasia 1, Parathyroid adenoma (somatic). This variant causes a nonsynonymous moderate amino acid substitution (p.T546A) which may alter protein function. ClinVar classifies this variant as non-pathogenic and reports an association with , not specified. This variant is predicted to be tolerable by SIFT and benign by PolyPhen2.

#### *c.2612C>T*

The patient is heterozygous for a common missense polymorphism in the BRCA1 gene which occurs at a frequency of 0.54% in the 1000 genomes project. OMIM reports 2 phenotypes associated with variants in the BRCA1 gene including Breast-ovarian cancer (familial) (1), susceptibility to Pancreatic cancer 4. This variant causes a nonsynonymous moderate amino acid substitution (p.P871L) which may alter protein function. This variant is predicted to be tolerable by SIFT and benign by PolyPhen2.

#### *c.2318G>A*

The patient is heterozygous for a common missense polymorphism in the DSG2 gene which occurs at a frequency of 0.24% in the 1000 genomes project. OMIM reports 2 phenotypes associated with variants in the DSG2 gene including Arrhythmogenic right ventricular dysplasia 10, Cardiomyopathy (dilated) (1BB). This variant causes a nonsynonymous conservative amino acid substitution (p.R773K) which may alter protein function. ClinVar classifies this variant as non-pathogenic and reports an association with not specified. This variant is predicted to be tolerable by SIFT and benign by PolyPhen2.

#### *c.5465T>A*

The patient is homozygous for a common missense polymorphism in the APC gene which occurs at a frequency of 0.87% in the 1000 genomes project. OMIM reports 8 phenotypes associated with variants in the APC gene including Adenoma (periampullary) (somatic), Adenomatous polyposis coli, Brain tumor-polyposis syndrome 2, Colorectal cancer (somatic), Desmoid disease (hereditary), Gardner syndrome, Gastric cancer (somatic), Hepatoblastoma (somatic). This variant causes a nonsynonymous severe amino acid substitution (p.V1822D) which may alter protein function. ClinVar classifies this variant as non-pathogenic and other and reports an association with Adenomatous polyposis coli, , not specified, Familial colorectal cancer, Neoplastic Syndromes ( Hereditary). This variant is predicted to be benign by PolyPhen2.

#### *c.1621A>G*

The patient is homozygous for a common missense polymorphism in the PMS2 gene which occurs at a frequency of 0.99% in the 1000 genomes project. OMIM reports 2 phenotypes



occurs at a frequency of 0.00% in the 1000 genomes project. OMIM reports 2 phenotypes associated with variants in the PMS2 gene including Colorectal cancer (hereditary nonpolyposis) (type 4), Mismatch repair cancer syndrome. This variant causes a nonsynonymous moderate amino acid substitution (p.K541E) which may alter protein function. ClinVar classifies this variant as non-pathogenic and reports an association with Lynch syndrome. This variant is predicted to be tolerable by SIFT and benign by PolyPhen2.

#### *c.4059T>G*

The patient is homozygous for a common missense polymorphism in the COL3A1 gene which occurs at a frequency of 1.0% in the 1000 genomes project. OMIM reports 2 phenotypes associated with variants in the COL3A1 gene including Ehlers-Danlos syndrome (type III), Ehlers-Danlos syndrome (type IV). This variant causes a nonsynonymous conservative amino acid substitution (p.H1353Q) which may alter protein function. This variant is predicted to be tolerable by SIFT and benign by PolyPhen2.

#### *c.2077G>A*

The patient is heterozygous for a common missense polymorphism in the BRCA1 gene which occurs at a frequency of 0.034% in the 1000 genomes project. OMIM reports 2 phenotypes associated with variants in the BRCA1 gene including Breast-ovarian cancer (familial) (1), susceptibility to Pancreatic cancer 4. This variant causes a nonsynonymous conservative amino acid substitution (p.D693N) which may alter protein function. ClinVar classifies this variant as non-pathogenic and reports an association with Breast-ovarian cancer (familial 1), BRCA1 and BRCA2 Hereditary Breast and Ovarian Cancer, Breast-ovarian cancer (familial 1), not specified, Neoplastic Syndromes (Hereditary). ARUP classifies this variant as 1 - Not pathogenic or of no clinical significance. Invitae classifies this variant as Benign. This variant is predicted to be deleterious by SIFT and benign by PolyPhen2.

#### *c.1114A>C*

The patient is heterozygous for a common missense polymorphism in the BRCA2 gene which occurs at a frequency of 0.25% in the 1000 genomes project. OMIM reports 9 phenotypes associated with variants in the BRCA2 gene including Fanconi anemia (complementation group D1), Pancreatic cancer, Prostate cancer, Wilms tumor, susceptibility to Breast cancer (male), Breast-ovarian cancer (familial) (2), Glioblastoma 3, Medulloblastoma, Pre-B-cell acute lymphoblastic leukemia. This variant causes a nonsynonymous moderate amino acid substitution (p.N372H) which may alter protein function. ClinVar classifies this variant as other, non-pathogenic and untested and reports an association with Breast-ovarian cancer (familial 2), , not specified, Neoplastic Syndromes (Hereditary). This variant is predicted to be tolerable by SIFT

#### *c.1486C>G*

The patient is homozygous for a common missense polymorphism in the MYLK gene which occurs at a frequency of 1.0% in the 1000 genomes project. OMIM reports that variants in the MYLK gene are associated with Aortic aneurysm (familial thoracic 7). This variant causes a nonsynonymous conservative amino acid substitution (p.L496V) which may alter protein function. This variant is predicted to be tolerable by SIFT and benign by PolyPhen2.

#### *c.1420G>A*

The patient is homozygous for a common missense polymorphism in the PCSK9 gene which occurs at a frequency of 0.87% in the 1000 genomes project. OMIM reports 2 phenotypes associated with variants in the PCSK9 gene including Hypercholesterolemia (familial) (3), Low density lipoprotein cholesterol level QTL 1. This variant causes a nonsynonymous conservative amino acid substitution (p.V474I) which may alter protein function. This variant is predicted to be tolerable by SIFT and benign by PolyPhen2.

#### *c.13013G>A*

The patient is homozygous for a common missense polymorphism in the APOB gene which occurs at a frequency of 0.63% in the 1000 genomes project. OMIM reports 2 phenotypes associated with variants in the APOB gene including Hypercholesterolemia (due to ligand-defective

apo B), Hypobetalipoproteinemia. This variant causes a nonsynonymous conservative amino acid substitution (p.S4338N) which may alter protein function. ClinVar classifies this variant as probable-non-pathogenic and reports an association with not specified. This variant is predicted to be tolerable by SIFT and benign by PolyPhen2.

#### *c.2009G>A*

The patient is homozygous for a common missense polymorphism in the PCSK9 gene which occurs at a frequency of 0.9% in the 1000 genomes project. OMIM reports 2 phenotypes associated with variants in the PCSK9 gene including Hypercholesterolemia (familial) (3), Low density lipoprotein cholesterol level QTL 1. This variant causes a nonsynonymous moderate amino acid substitution (p.G670E) which may alter protein function. ClinVar classifies this variant as non-pathogenic and reports an association with Familial hypercholesterolemia. This variant is predicted to be tolerable by SIFT and benign by PolyPhen2.

#### *c.2393G>A*

The patient is heterozygous for a common missense polymorphism in the DSC2 gene which occurs at a frequency of 0.028% in the 1000 genomes project. OMIM reports 2 phenotypes associated with variants in the DSC2 gene including Arrhythmogenic right ventricular dysplasia 11 with mild palmoplantar keratoderma and woolly hair, Arrhythmogenic right ventricular dysplasia 11. This variant causes a nonsynonymous conservative amino acid substitution (p.R798Q) which may alter protein function. ClinVar classifies this variant as unknown and reports an association with not specified; Arrhythmogenic right ventricular cardiomyopathy, not specified. This variant is predicted to be tolerable by SIFT and benign by PolyPhen2.

#### *c.6937A>G*

The patient is homozygous for a common missense polymorphism in the APOB gene which occurs at a frequency of 0.99% in the 1000 genomes project. OMIM reports 2 phenotypes associated with variants in the APOB gene including Hypercholesterolemia (due to ligand-defective apo B), Hypobetalipoproteinemia. This variant causes a nonsynonymous conservative amino acid substitution (p.I2313V) which may alter protein function. This variant is predicted to be tolerable by SIFT and benign by PolyPhen2.

## RECOMMENDATIONS

---

Genetic counseling of the family is recommended to discuss the implications of this report.  
[Additional recommendations.]

## METHODS AND LIMITATIONS

---

This report is a sample to be used solely for the purpose of evaluating functionality of the Tute Platform and should not be used in any clinical application.

### Sequencing and Variant Detection

Whole exome sequencing was performed by solution-based hybridization which enriches for coding exons targeting DNA with specific baits. Sequencing was performed using the Illumina HiSeq 2500 to a minimum average exome depth of 90X. Sequencing reads were aligned to the reference genome (hg19) by BWA-MEM and variants were called using FreeBayes.

### Variant Analysis and Report Generation

Reported variants were analyzed using the Tute platform to identify those variants which are reported by medical literature to be pathogenic. All non-synonymous variants of allele frequency <1% reported by the 1000 genomes project and annotated as 'Pathogenic' or 'Probably Pathogenic' by ClinVar are reported in the table 'Primary/Diagnostic Sequence Variant(s) Detected'. Careful correlation of these variants with the clinical indications for the proband should be conducted by an experience medical geneticist to verify that reported findings are consistent with reported clinical phenotypes. Additionally, variants are included based on ACMG guidelines for the reporting of incidental findings in the table 'Secondary/Incidental Sequence Variant(s) Detected'.

### Validation of reported findings

Variants of interest should be confirmed by Sanger sequencing. The DNA immediately flanking each of these variants should be amplified genomic DNA followed by sequencing in both directions using fluorescent dideoxy sequencing.

### Limitations

Absence of a primary diagnostic finding identified by this test does not exclude the possibility of a genetic basis for the clinical condition for this proband. Certain genetic abnormalities are not detectable by the technologies used to generate this report. Specifically, detection of abnormal variants depends on the presence of these sequence variants in the sequencing data. This exome sequence test is designed to evaluate single nucleotide variants within the human exome; however, this technology is only able to sequence 90-95% of the human reference to the requisite 10-fold coverage needed for reliable detection of heterozygous variants.

Additionally, certain types of genetic abnormalities are difficult to identify in sequencing data and have not been validated for clinical use including insertions, deletions, copy number alterations, long repetitive sequences, triplet repeat expansions, chromosomal rearrangements, polyploidy, repetitive regions including mono-, di- and tri-nucleotide repeats, GX rich regions, intronic variants outside the splice-site and epigenetic effects.

Variants believed to be benign based on medical literature, or with population frequencies greater than or equal to 1%, or resulting in synonymous amino acid changes, or occurring in 5' or 3' untranslated regions are generally not reported.

This report is a sample to be used solely for the purpose of evaluating functionality of the Tute Platform and should not be used in any clinical application.

## Sources

---

### REPORT SIGNATURES

---

Online Mendelian Inheritance in Man, OMIM (TM). Retrieved 0/26/2015 from <http://www.ncbi.nlm.nih.gov/omim/>  
ClinVar. Retrieved 0/26/2015 from <http://www.ncbi.nlm.nih.gov/clinvar/>

**ORDERING PROVIDER**

,

**SPECIMEN**

Collection Date:

Received Date:

Report Date:

**PATIENT**

Name:

Date of Birth:

Patient ID:

Gender:

Clinical Indication:

---

[Detailed clinical description.]

**TEST RESULTS SUMMARY**

---

Primary Result(s): [Findings related to clinical indication.]

Incidental/Secondary Result(s): [Incidental findings.]

PRIMARY/DIAGNOSTIC SEQUENCE VARIANT(S) DETECTED

| Gene    | Nucleotide Change | Protein Change | Zygoty | Tute Dx                                                       |
|---------|-------------------|----------------|--------|---------------------------------------------------------------|
| HFE     | c.845G>A          | p.C282Y        | het    | Hereditary hemochromatosis Hemochromatosis, juvenile, digenic |
| CFTR    | c.224G>A          | p.R75Q         | het    | Hereditary pancreatitis;Cystic fibrosis                       |
| GNPTAB  | c.569A>G          | p.D190G        | het    | Mucopolysaccharidosis, MPS-III-A                              |
| F5      | c.1601A>G         | p.Q534R        | het    | Thrombophilia due to factor V Leiden                          |
| DPYD    | c.85C>T           | p.R29C         | hom    | Dihydropyrimidine dehydrogenase deficiency;not provided       |
| SPINK1  | c.194+2T>C        | .              | het    | Hereditary pancreatitis                                       |
| PRSS1   | c.86A>T           | p.N29I         | het    | Hereditary pancreatitis;Hereditary pancreatitis               |
| FUT2    | c.461G>A          | p.W154X        | het    | Norwalk virus infection, resistance to                        |
| CFTR    | c.1666A>G         | p.I556V        | het    | Cystic fibrosis Nonclassic cystic fibrosis                    |
| SCN5A   | c.3578G>A         | p.R1193Q       | het    | Brugada syndrome 1                                            |
| FGFR4   | c.1162G>A         | p.G388R        | het    | Cancer progression and tumor cell motility                    |
| ITGB3   | c.176T>C          | p.L59P         | het    | Thrombocytopenia, neonatal alloimmune Posttransfusion purpura |
| TIRAP   | c.539C>T          | p.S180L        | het    | Malaria, resistance to BACTEREMIA, RESISTANCE TO              |
| HEXB    | c.185T>C          | p.L62S         | hom    | Sandhoff disease, infantile type                              |
| BBS2    | c.209G>A          | p.S70N         | hom    | Bardet-Biedl syndrome 2                                       |
| ITGA2B  | c.2621T>G         | p.I874S        | hom    | Bak platelet-specific antigen                                 |
| IL4R    | c.1462T>C         | p.S488P        | het    | Atopy, resistance to                                          |
| SLC24A5 | c.331A>G          | p.T111A        | het    | Skin/hair/eye pigmentation, variation in, 4                   |
| HPD     | c.97A>G           | p.T33A         | hom    | 4-Alpha-hydroxyphenylpyruvate hydroxylase deficiency          |
| CYP4V2  | c.64C>G           | p.L22V         | het    | Bietti crystalline corneoretinal dystrophy                    |

## SECONDARY/INCIDENTAL SEQUENCE VARIANT(S) DETECTED

The American College of Medical Genetics and Genomics (ACMG) recently published a policy statement on clinical sequencing that emphasizes the possibility of recognizing and reporting incidental or secondary findings of medical value when conducting exome and genome sequencing. The ACMG recommends that laboratories performing clinical sequencing seek and report mutations of specified classes or types in the genes listed within the guidelines. This section of the report describes variants which fit the criteria outlined by ACMG for the reporting of incidental or secondary findings.

| Gene   | Nucleotide Change | Protein Change | Zygoty | Tute Dx                          |
|--------|-------------------|----------------|--------|----------------------------------|
| MSH2   | c.1168C>T         | p.L390F        | het    | Colorectal cancer, non-polyposis |
| KCNQ1  | c.1927G>A         | p.G643S        | het    | .                                |
| MSH6   | c.3143A>T         | p.Q1048L       | het    | .                                |
| SCN5A  | c.3578G>A         | p.R1193Q       | het    | Brugada syndrome 1               |
| SDHD   | c.371A>G          | p.Q124R        | hom    | .                                |
| FBN1   | c.1415G>A         | p.C472Y        | hom    | .                                |
| DSC2   | c.2326A>G         | p.I776V        | het    | .                                |
| APOB   | c.1853C>T         | p.A618V        | het    | .                                |
| TP53   | c.215C>G          | p.P72R         | het    | .                                |
| BRCA2  | c.7397T>C         | p.V2466A       | hom    | Breast cancer                    |
| MUTYH  | c.1014G>C         | p.Q338H        | het    | .                                |
| MEN1   | c.1636A>G         | p.T546A        | hom    | .                                |
| BRCA1  | c.2612C>T         | p.P871L        | het    | .                                |
| DSG2   | c.2318G>A         | p.R773K        | hom    | .                                |
| APC    | c.5465T>A         | p.V1822D       | hom    | .                                |
| PMS2   | c.1621A>G         | p.K541E        | hom    | Colorectal cancer, non-polyposis |
| COL3A1 | c.4059T>G         | p.H1353Q       | hom    | .                                |
| BRCA2  | c.1114A>C         | p.N372H        | hom    | .                                |
| MYLK   | c.1486C>G         | p.L496V        | hom    | .                                |
| PCSK9  | c.1420G>A         | p.V474I        | hom    | .                                |

## INTERPRETATION OF PRIMARY FINDINGS

### c.845G>A

The patient is heterozygous for a common missense polymorphism in the HFE gene which occurs at a frequency of 0.013% in the 1000 genomes project. OMIM reports 6 phenotypes associated with variants in the HFE gene including Hemochromatosis [Transferrin serum level (TI) 2] susceptibility to

variants in the HFE gene including Hemochromatosis, [Transferrin serum level Q1E2], susceptibility to Alzheimer disease, Microvascular complications of diabetes 7, susceptibility to Porphyria cutanea tarda, susceptibility to Porphyria variegata. This variant causes a nonsynonymous severe amino acid substitution (p.C282Y) which may alter protein function. ClinVar classifies this variant as pathogenic, other and non-pathogenic and reports an association with Hereditary hemochromatosis, Porphyria cutanea tarda (susceptibility to), Porphyria variegata (susceptibility to), Hemochromatosis (juvenile) (digenic), Alzheimer disease (susceptibility to), Transferrin serum level quantitative trait locus 2, Microvascular complications of diabetes 7, not specified. This variant is predicted to be deleterious by SIFT and deleterious by PolyPhen2.

#### *c.224G>A*

The patient is heterozygous for a common missense polymorphism in the CFTR gene which occurs at a frequency of 0.0064% in the 1000 genomes project. OMIM reports 6 phenotypes associated with variants in the CFTR gene including Congenital bilateral absence of vas deferens, Cystic fibrosis, Sweat chloride elevation without CF, modifier of Bronchiectasis with or without elevated sweat chloride 1, Hypertrypsinemia (neonatal), Pancreatitis (idiopathic). This variant causes a nonsynonymous conservative amino acid substitution (p.R75Q) which may alter protein function. ClinVar classifies this variant as probable-non-pathogenic, unknown, non-pathogenic and pathogenic and reports an association with Cystic fibrosis, , not specified, Hereditary pancreatitis;Cystic fibrosis. This variant is predicted to be deleterious by SIFT and deleterious by PolyPhen2.

#### *c.569A>G*

The patient is heterozygous for a common missense polymorphism in the GNPTAB gene which occurs at a frequency of 0.0002% in the 1000 genomes project. OMIM reports 2 phenotypes associated with variants in the GNPTAB gene including Mucopolysaccharidosis II alpha/beta, Mucopolysaccharidosis III alpha/beta. This variant causes a nonsynonymous moderate amino acid substitution (p.D190G) which may alter protein function. ClinVar classifies this variant as pathogenic and reports an association with Mucopolysaccharidosis (MPS-III-A). This variant is predicted to be deleterious by SIFT and benign by PolyPhen2.

#### *c.1601A>G*

The patient is heterozygous for a common missense polymorphism in the F5 gene which occurs at a frequency of 0.99% in the 1000 genomes project. OMIM reports 6 phenotypes associated with variants in the F5 gene including Factor V deficiency, Thrombophilia due to activated protein C resistance, Budd-Chiari syndrome, susceptibility to Pregnancy loss recurrent 1, susceptibility to Stroke (ischemic), susceptibility to Thrombophilia due to factor V Leiden. This variant causes a nonsynonymous conservative amino acid substitution (p.Q534R) which may alter protein function. ClinVar classifies this variant as pathogenic, untested and other and reports an association with Thrombophilia due to factor V Leiden, Ischemic stroke (susceptibility to), Budd-Chiari syndrome (susceptibility to), Recurrent abortion. This variant is predicted to be tolerable by SIFT

#### *c.85C>T*

The patient is homozygous for a common missense polymorphism in the DPYD gene which occurs at a frequency of 0.74% in the 1000 genomes project. OMIM reports 2 phenotypes associated with variants in the DPYD gene including 5-fluorouracil toxicity, Dihydropyrimidine dehydrogenase deficiency. This variant causes a nonsynonymous severe amino acid substitution (p.R29C) which may alter protein function. ClinVar classifies this variant as pathogenic and reports an association with Dihydropyrimidine dehydrogenase deficiency;. This variant is predicted to be tolerable by SIFT and deleterious by PolyPhen2.

#### *c.194+2T>C*

The patient is heterozygous for a rare mutation in the SPINK1 gene which occurs at a frequency of 0.0008% in the 1000 genomes project. OMIM reports 3 phenotypes associated with variants in the SPINK1 gene including Pancreatitis (hereditary), Tropical calcific pancreatitis, susceptibility to Fibrocalculous pancreatic diabetes. ClinVar classifies this variant as pathogenic and reports an association with Hereditary pancreatitis.



### *c.86A>T*

The patient is heterozygous for a common missense polymorphism in the PRSS1 gene which doesn't occur in the 1000 genomes project. OMIM reports 2 phenotypes associated with variants in the PRSS1 gene including Pancreatitis (hereditary), Trypsinogen deficiency. This variant causes a nonsynonymous moderate amino acid substitution (p.N29I) which may alter protein function. ClinVar classifies this variant as pathogenic and reports an association with Hereditary pancreatitis;Hereditary pancreatitis. This variant is predicted to be deleterious by SIFT and benign by PolyPhen2.

### *c.461G>A*

The patient is heterozygous for a common nonsense polymorphism in the FUT2 gene which occurs at a frequency of 0.32% in the 1000 genomes project. OMIM reports 3 phenotypes associated with variants in the FUT2 gene including [Bombay phenotype], resistance to Norwalk virus infection, Vitamin B12 plasma level QTL1. This variant introduces a premature stop codon which may lead to early termination of protein transcription. ClinVar classifies this variant as non-pathogenic, pathogenic and other and reports an association with SECRETOR/NONSECRETOR POLYMORPHISM, Norwalk virus infection ( resistance to), Vitamin b12 plasma level quantitative trait locus 1. This variant is predicted to be tolerable by SIFT

### *c.1666A>G*

The patient is heterozygous for a common missense polymorphism in the CFTR gene which occurs at a frequency of 0.011% in the 1000 genomes project. OMIM reports 6 phenotypes associated with variants in the CFTR gene including Congenital bilateral absence of vas deferens, Cystic fibrosis, Sweat chloride elevation without CF, modifier of Bronchiectasis with or without elevated sweat chloride 1, Hypertrypsinemia (neonatal), Pancreatitis (idiopathic). This variant causes a nonsynonymous conservative amino acid substitution (p.I556V) which may alter protein function. ClinVar classifies this variant as pathogenic and probable-pathogenic and reports an association with Cystic fibrosis, Nonclassic cystic fibrosis. This variant is predicted to be tolerable by SIFT and benign by PolyPhen2.

### *c.3578G>A*

The patient is heterozygous for a common missense polymorphism in the SCN5A gene which occurs at a frequency of 0.012% in the 1000 genomes project. OMIM reports 9 phenotypes associated with variants in the SCN5A gene including Atrial fibrillation (familial) (10), Brugada syndrome 1, Cardiomyopathy (dilated) (1E), Heart block (nonprogressive), Heart block (progressive) (type IA), Long QT syndrome-3, Sick sinus syndrome 1, Ventricular fibrillation (familial) (1), susceptibility to Sudden infant death syndrome. This variant causes a nonsynonymous conservative amino acid substitution (p.R1193Q) which may alter protein function. ClinVar classifies this variant as pathogenic and other and reports an association with Brugada syndrome 1, Long QT syndrome 3 ( acquired) ( susceptibility to). This variant is predicted to be tolerable by SIFT and possibly deleterious by PolyPhen2.

### *c.1162G>A*

The patient is heterozygous for a common missense polymorphism in the FGFR4 gene which occurs at a frequency of 0.3% in the 1000 genomes project. OMIM reports that variants in the FGFR4 gene are associated with Cancer progression/metastasis. This variant causes a nonsynonymous moderate amino acid substitution (p.G388R) which may alter protein function. ClinVar classifies this variant as pathogenic and reports an association with Cancer progression and tumor cell motility. This variant is predicted to be deleterious by SIFT and deleterious by PolyPhen2.

### *c.176T>C*

The patient is heterozygous for a common missense polymorphism in the ITGB3 gene which occurs at a frequency of 0.089% in the 1000 genomes project. OMIM reports 5 phenotypes associated with variants in the ITGB3 gene including Bleeding disorder (platelet-type) (16) (autosomal dominant), Glanzmann thrombasthenia, Purpura (posttransfusion), Thrombocytopenia (neonatal alloimmune), susceptibility to Myocardial infarction. This variant causes a nonsynonymous

moderate amino acid substitution (p.L59P) which may alter protein function. ClinVar classifies this variant as non-pathogenic, pathogenic and other and reports an association with PL(A1)/(A2) ALLOANTIGEN POLYMORPHISM, Thrombocytopenia ( neonatal alloimmune), Posttransfusion purpura, Myocardial infarction, Fracture ( hip) ( susceptibility to). This variant is predicted to be tolerable by SIFT and benign by PolyPhen2.

#### *c.539C>T*

The patient is heterozygous for a common missense polymorphism in the TIRAP gene which occurs at a frequency of 0.086% in the 1000 genomes project. OMIM reports 4 phenotypes associated with variants in the TIRAP gene including protection against Bacteremia, protection against Malaria, protection against Pneumococcal disease (invasive), protection against Tuberculosis. This variant causes a nonsynonymous moderate amino acid substitution (p.S180L) which may alter protein function. ClinVar classifies this variant as other and pathogenic and reports an association with Invasive pneumococcal disease ( protection against), Malaria ( resistance to), Mycobacterium tuberculosis ( protection against), BACTEREMIA ( RESISTANCE TO). This variant is predicted to be possibly deleterious by PolyPhen2.

#### *c.185T>C*

The patient is homozygous for a common missense polymorphism in the HEXB gene which occurs at a frequency of 0.98% in the 1000 genomes project. OMIM reports that variants in the HEXB gene are associated with Sandhoff disease (infantile) (juvenile) (and adult forms). This variant causes a nonsynonymous moderate amino acid substitution (p.L62S) which may alter protein function. ClinVar classifies this variant as pathogenic and reports an association with Sandhoff disease ( infantile type). This variant is predicted to be tolerable by SIFT

#### *c.209G>A*

The patient is homozygous for a common missense polymorphism in the BBS2 gene which occurs at a frequency of 1.% in the 1000 genomes project. OMIM reports that variants in the BBS2 gene are associated with Bardet-Biedl syndrome 2. This variant causes a nonsynonymous conservative amino acid substitution (p.S70N) which may alter protein function. ClinVar classifies this variant as pathogenic and reports an association with Bardet-Biedl syndrome 2. This variant is predicted to be tolerable by SIFT

#### *c.2621T>G*

The patient is homozygous for a common missense polymorphism in the ITGA2B gene which occurs at a frequency of 0.4% in the 1000 genomes project. OMIM reports 3 phenotypes associated with variants in the ITGA2B gene including Bleeding disorder (platelet-type) (16) (autosomal dominant), Glanzmann thrombasthenia, Thrombocytopenia (neonatal alloimmune) (BAK antigen related). This variant causes a nonsynonymous moderate amino acid substitution (p.I874S) which may alter protein function. ClinVar classifies this variant as pathogenic and reports an association with Bak platelet-specific antigen. This variant is predicted to be tolerable by SIFT and benign by PolyPhen2.

#### *c.1462T>C*

The patient is heterozygous for a common missense polymorphism in the IL4R gene which occurs at a frequency of 0.2% in the 1000 genomes project. OMIM reports 2 phenotypes associated with variants in the IL4R gene including slow progression to AIDS, susceptibility to Atopy. This variant causes a nonsynonymous moderate amino acid substitution (p.S488P) which may alter protein function. ClinVar classifies this variant as pathogenic and other and reports an association with Atopy ( resistance to), Asthma ( susceptibility to). This variant is predicted to be tolerable by SIFT and possibly deleterious by PolyPhen2.

#### *c.331A>G*

The patient is heterozygous for a common missense polymorphism in the SLC24A5 gene which occurs at a frequency of 0.56% in the 1000 genomes project. OMIM reports 2 phenotypes associated with variants in the SLC24A5 gene including Albinism (oculocutaneous) (type VI),

[Skin/hair/eye pigmentation 4 (fair)/dark skin]. This variant causes a nonsynonymous moderate amino acid substitution (p.T111A) which may alter protein function. ClinVar classifies this variant as pathogenic and reports an association with Skin/hair/eye pigmentation ( variation in) ( 4). This variant is predicted to be tolerable by SIFT and benign by PolyPhen2.

#### *c.97A>G*

The patient is homozygous for a common missense polymorphism in the HPD gene which occurs at a frequency of 0.88% in the 1000 genomes project. OMIM reports 2 phenotypes associated with variants in the HPD gene including Hawkinsinuria, Tyrosinemia (type III). This variant causes a nonsynonymous moderate amino acid substitution (p.T33A) which may alter protein function. ClinVar classifies this variant as pathogenic and reports an association with 4-Alpha-hydroxyphenylpyruvate hydroxylase deficiency. This variant is predicted to be tolerable by SIFT

#### *c.64C>G*

The patient is heterozygous for a common missense polymorphism in the CYP4V2 gene which occurs at a frequency of 0.41% in the 1000 genomes project. OMIM reports that variants in the CYP4V2 gene are associated with Bietti crystalline corneoretinal dystrophy. This variant causes a nonsynonymous conservative amino acid substitution (p.L22V) which may alter protein function. ClinVar classifies this variant as pathogenic, non-pathogenic and probable-non-pathogenic and reports an association with Bietti crystalline corneoretinal dystrophy, not specified. This variant is predicted to be tolerable by SIFT and benign by PolyPhen2.

## INTERPRETATION OF SECONDARY FINDINGS

---

#### *c.1168C>T*

The patient is heterozygous for a common missense polymorphism in the MSH2 gene which occurs at a frequency of 0.0028% in the 1000 genomes project. OMIM reports 3 phenotypes associated with variants in the MSH2 gene including Colorectal cancer (hereditary nonpolyposis) (type 1), Mismatch repair cancer syndrome, Muir-Torre syndrome. This variant causes a nonsynonymous conservative amino acid substitution (p.L390F) which may alter protein function. ClinVar classifies this variant as unknown, non-pathogenic and other and reports an association with , Lynch syndrome, not specified, Neoplastic Syndromes ( Hereditary). This variant is predicted to be deleterious by SIFT and benign by PolyPhen2.

#### *c.1927G>A*

The patient is heterozygous for a common missense polymorphism in the KCNQ1 gene which occurs at a frequency of 0.017% in the 1000 genomes project. OMIM reports 5 phenotypes associated with variants in the KCNQ1 gene including Atrial fibrillation (familial) (3), Jervell and Lange-Nielsen syndrome, Long QT syndrome 1, Short QT syndrome 2, susceptibility to Long QT syndrome 1 (acquired). This variant causes a nonsynonymous moderate amino acid substitution (p.G643S) which may alter protein function. ClinVar classifies this variant as probable-non-pathogenic and non-pathogenic and reports an association with Cardiac arrhythmia. This variant is predicted to be tolerable by SIFT and benign by PolyPhen2.

#### *c.3143A>T*

The patient is heterozygous for a rare mutation in the MSH6 gene which doesn't occur in the 1000 genomes project. OMIM reports 3 phenotypes associated with variants in the MSH6 gene including Colorectal cancer (hereditary nonpolyposis) (type 5), Endometrial cancer (familial), Mismatch repair cancer syndrome. This variant causes a nonsynonymous moderate amino acid substitution (p.Q1048L) which may alter protein function. This variant is predicted to be tolerable by SIFT and benign by PolyPhen2.

#### *c.3578G>A*

The patient is heterozygous for a common missense polymorphism in the SCN5A gene which

occurs at a frequency of 0.012% in the 1000 genomes project. OMIM reports 9 phenotypes associated with variants in the SCN5A gene including Atrial fibrillation (familial) (10), Brugada syndrome 1, Cardiomyopathy (dilated) (1E), Heart block (nonprogressive), Heart block (progressive) (type IA), Long QT syndrome-3, Sick sinus syndrome 1, Ventricular fibrillation (familial) (1), susceptibility to Sudden infant death syndrome. This variant causes a nonsynonymous conservative amino acid substitution (p.R1193Q) which may alter protein function. ClinVar classifies this variant as pathogenic and other and reports an association with Brugada syndrome 1, Long QT syndrome 3 (acquired) (susceptibility to). This variant is predicted to be tolerable by SIFT and possibly deleterious by PolyPhen2.

#### *c.371A>G*

The patient is homozygous for a common missense polymorphism in the SDHD gene which occurs at a frequency of 0.95% in the 1000 genomes project. OMIM reports 6 phenotypes associated with variants in the SDHD gene including Carcinoid tumors (intestinal), Cowden syndrome 3, Merkel cell carcinoma (somatic), Paraganglioma and gastric stromal sarcoma, Paragangliomas 1 (with or without deafness), Pheochromocytoma. This variant causes a nonsynonymous conservative amino acid substitution (p.Q124R) which may alter protein function. This variant is predicted to be tolerable by SIFT

#### *c.1415G>A*

The patient is homozygous for a common missense polymorphism in the FBN1 gene which occurs at a frequency of 1.% in the 1000 genomes project. OMIM reports 8 phenotypes associated with variants in the FBN1 gene including Acromioclavicular dysplasia, Aortic aneurysm (ascending) (and dissection), Ectopia lentis (familial), Geleophysic dysplasia 2, MASS syndrome, Marfan syndrome, Stiff skin syndrome, Weill-Marchesani syndrome 2 (dominant). This variant causes a nonsynonymous severe amino acid substitution (p.C472Y) which may alter protein function. This variant is predicted to be tolerable by SIFT and benign by PolyPhen2.

#### *c.2326A>G*

The patient is heterozygous for a common missense polymorphism in the DSC2 gene which occurs at a frequency of 0.2% in the 1000 genomes project. OMIM reports 2 phenotypes associated with variants in the DSC2 gene including Arrhythmogenic right ventricular dysplasia 11 with mild palmoplantar keratoderma and woolly hair, Arrhythmogenic right ventricular dysplasia 11. This variant causes a nonsynonymous conservative amino acid substitution (p.I776V) which may alter protein function. ClinVar classifies this variant as non-pathogenic and reports an association with not specified. This variant is predicted to be tolerable by SIFT and benign by PolyPhen2.

#### *c.1853C>T*

The patient is heterozygous for a common missense polymorphism in the APOB gene which occurs at a frequency of 0.48% in the 1000 genomes project. OMIM reports 2 phenotypes associated with variants in the APOB gene including Hypercholesterolemia (due to ligand-defective apo B), Hypobetalipoproteinemia. This variant causes a nonsynonymous moderate amino acid substitution (p.A618V) which may alter protein function. ClinVar classifies this variant as probable-non-pathogenic and reports an association with not specified. This variant is predicted to be tolerable by SIFT and deleterious by PolyPhen2.

#### *c.215C>G*

The patient is heterozygous for a common missense polymorphism in the TP53 gene which occurs at a frequency of 0.54% in the 1000 genomes project. OMIM reports 11 phenotypes associated with variants in the TP53 gene including Adrenal cortical carcinoma, Breast cancer, Choroid plexus papilloma, Colorectal cancer, Hepatocellular carcinoma, Li-Fraumeni syndrome, Nasopharyngeal carcinoma, Osteosarcoma, Pancreatic cancer, Basal cell carcinoma 7, Glioma susceptibility 1. This variant causes a nonsynonymous moderate amino acid substitution (p.P72R) which may alter protein function. ClinVar classifies this variant as non-pathogenic and reports an association with CODON 72 POLYMORPHISM ( ) (rs1042522), , not specified, Neoplastic Syndromes ( Hereditary). This variant is predicted to be tolerable by SIFT and possibly deleterious by PolyPhen2.

### *c.7397T>C*

The patient is homozygous for a common missense polymorphism in the BRCA2 gene which occurs at a frequency of 0.98% in the 1000 genomes project. OMIM reports 9 phenotypes associated with variants in the BRCA2 gene including Fanconi anemia (complementation group D1), Pancreatic cancer, Prostate cancer, Wilms tumor, susceptibility to Breast cancer (male), Breast-ovarian cancer (familial) (2), Glioblastoma 3, Medulloblastoma, Pre-B-cell acute lymphoblastic leukemia. This variant causes a nonsynonymous moderate amino acid substitution (p.V2466A) which may alter protein function. ClinVar classifies this variant as untested, unknown and non-pathogenic and reports an association with Familial cancer of breast, Breast-ovarian cancer (familial 2), not specified. This variant is predicted to be tolerable by SIFT

### *c.1014G>C*

The patient is heterozygous for a common missense polymorphism in the MUTYH gene which occurs at a frequency of 0.31% in the 1000 genomes project. OMIM reports 3 phenotypes associated with variants in the MUTYH gene including Adenomas (multiple colorectal), Colorectal adenomatous polyposis (autosomal recessive) (with pilomatricomas), Gastric cancer (somatic). This variant causes a nonsynonymous conservative amino acid substitution (p.Q338H) which may alter protein function. ClinVar classifies this variant as non-pathogenic and reports an association with , not specified, Neoplastic Syndromes ( Hereditary). This variant is predicted to be tolerable by SIFT and possibly deleterious by PolyPhen2.

### *c.1636A>G*

The patient is homozygous for a common missense polymorphism in the MEN1 gene which occurs at a frequency of 0.83% in the 1000 genomes project. OMIM reports 6 phenotypes associated with variants in the MEN1 gene including Adrenal adenoma (somatic), Angiofibroma (somatic), Carcinoid tumor of lung, Lipoma (somatic), Multiple endocrine neoplasia 1, Parathyroid adenoma (somatic). This variant causes a nonsynonymous moderate amino acid substitution (p.T546A) which may alter protein function. ClinVar classifies this variant as non-pathogenic and reports an association with , not specified. This variant is predicted to be tolerable by SIFT and benign by PolyPhen2.

### *c.2612C>T*

The patient is heterozygous for a common missense polymorphism in the BRCA1 gene which occurs at a frequency of 0.54% in the 1000 genomes project. OMIM reports 2 phenotypes associated with variants in the BRCA1 gene including Breast-ovarian cancer (familial) (1), susceptibility to Pancreatic cancer 4. This variant causes a nonsynonymous moderate amino acid substitution (p.P871L) which may alter protein function. This variant is predicted to be tolerable by SIFT and benign by PolyPhen2.

### *c.2318G>A*

The patient is homozygous for a common missense polymorphism in the DSG2 gene which occurs at a frequency of 0.24% in the 1000 genomes project. OMIM reports 2 phenotypes associated with variants in the DSG2 gene including Arrhythmogenic right ventricular dysplasia 10, Cardiomyopathy (dilated) (1BB). This variant causes a nonsynonymous conservative amino acid substitution (p.R773K) which may alter protein function. ClinVar classifies this variant as non-pathogenic and reports an association with not specified. This variant is predicted to be tolerable by SIFT and benign by PolyPhen2.

### *c.5465T>A*

The patient is homozygous for a common missense polymorphism in the APC gene which occurs at a frequency of 0.87% in the 1000 genomes project. OMIM reports 8 phenotypes associated with variants in the APC gene including Adenoma (periampullary) (somatic), Adenomatous polyposis coli, Brain tumor-polyposis syndrome 2, Colorectal cancer (somatic), Desmoid disease (hereditary), Gardner syndrome, Gastric cancer (somatic), Hepatoblastoma (somatic). This variant causes a nonsynonymous severe amino acid substitution (p.V1822D) which may alter protein function. ClinVar classifies this variant as non-pathogenic and other and reports an association with Adenomatous

classifies this variant as nonpathogenic and other and reports an association with Adenomatous polyposis coli, , not specified, Familial colorectal cancer, Neoplastic Syndromes ( Hereditary). This variant is predicted to be benign by PolyPhen2.

#### *c.1621A>G*

The patient is homogeneous for a common missense polymorphism in the PMS2 gene which occurs at a frequency of 0.88% in the 1000 genomes project. OMIM reports 2 phenotypes associated with variants in the PMS2 gene including Colorectal cancer (hereditary nonpolyposis) (type 4), Mismatch repair cancer syndrome. This variant causes a nonsynonymous moderate amino acid substitution (p.K541E) which may alter protein function. ClinVar classifies this variant as non-pathogenic and reports an association with Lynch syndrome. This variant is predicted to be tolerable by SIFT and benign by PolyPhen2.

#### *c.4059T>G*

The patient is homogeneous for a common missense polymorphism in the COL3A1 gene which occurs at a frequency of 1.% in the 1000 genomes project. OMIM reports 2 phenotypes associated with variants in the COL3A1 gene including Ehlers-Danlos syndrome (type III), Ehlers-Danlos syndrome (type IV). This variant causes a nonsynonymous conservative amino acid substitution (p.H1353Q) which may alter protein function. This variant is predicted to be tolerable by SIFT and benign by PolyPhen2.

#### *c.1114A>C*

The patient is homogeneous for a common missense polymorphism in the BRCA2 gene which occurs at a frequency of 0.25% in the 1000 genomes project. OMIM reports 9 phenotypes associated with variants in the BRCA2 gene including Fanconi anemia (complementation group D1), Pancreatic cancer, Prostate cancer, Wilms tumor, susceptibility to Breast cancer (male), Breast-ovarian cancer (familial) (2), Glioblastoma 3, Medulloblastoma, Pre-B-cell acute lymphoblastic leukemia. This variant causes a nonsynonymous moderate amino acid substitution (p.N372H) which may alter protein function. ClinVar classifies this variant as other, non-pathogenic and untested and reports an association with Breast-ovarian cancer ( familial 2), , not specified, Neoplastic Syndromes ( Hereditary). This variant is predicted to be tolerable by SIFT

#### *c.1486C>G*

The patient is homogeneous for a common missense polymorphism in the MYLK gene which occurs at a frequency of 1.% in the 1000 genomes project. OMIM reports that variants in the MYLK gene are associated with Aortic aneurysm (familial thoracic 7). This variant causes a nonsynonymous conservative amino acid substitution (p.L496V) which may alter protein function. This variant is predicted to be tolerable by SIFT and benign by PolyPhen2.

#### *c.1420G>A*

The patient is homogeneous for a common missense polymorphism in the PCSK9 gene which occurs at a frequency of 0.87% in the 1000 genomes project. OMIM reports 2 phenotypes associated with variants in the PCSK9 gene including Hypercholesterolemia (familial) (3), Low density lipoprotein cholesterol level QTL 1. This variant causes a nonsynonymous conservative amino acid substitution (p.V474I) which may alter protein function. This variant is predicted to be tolerable by SIFT and benign by PolyPhen2.

## RECOMMENDATIONS

---

Genetic counseling of the family is recommended to discuss the implications of this report.  
[Additional recommendations.]

## METHODS AND LIMITATIONS

---

This report is a sample to be used solely for the purpose of evaluating functionality of the Tute Platform and should not be used in any clinical application.

### Sequencing and Variant Detection

Whole exome sequencing was performed by solution-based hybridization which enriches for coding exons targeting DNA with specific baits. Sequencing was performed using the Illumina HiSeq 2500 to a minimum average exome depth of 90X. Sequencing reads were aligned to the reference genome (hg19) by BWA-MEM and variants were called using FreeBayes.

### Variant Analysis and Report Generation

Reported variants were analyzed using the Tute platform to identify those variants which are reported by medical literature to be pathogenic. All non-synonymous variants of allele frequency <1% reported by the 1000 genomes project and annotated as 'Pathogenic' or 'Probably Pathogenic' by ClinVar are reported in the table 'Primary/Diagnostic Sequence Variant(s) Detected'. Careful correlation of these variants with the clinical indications for the proband should be conducted by an experience medical geneticist to verify that reported findings are consistent with reported clinical phenotypes. Additionally, variants are included based on ACMG guidelines for the reporting of incidental findings in the table 'Secondary/Incidental Sequence Variant(s) Detected'.

### Validation of reported findings

Variants of interest should be confirmed by Sanger sequencing. The DNA immediately flanking each of these variants should be amplified genomic DNA followed by sequencing in both directions using fluorescent dideoxy sequencing.

### Limitations

Absence of a primary diagnostic finding identified by this test does not exclude the possibility of a genetic basis for the clinical condition for this proband. Certain genetic abnormalities are not detectable by the technologies used to generate this report. Specifically, detection of abnormal variants depends on the presence of these sequence variants in the sequencing data. This exome sequence test is designed to evaluate single nucleotide variants within the human exome; however, this technology is only able to sequence 90-95% of the human reference to the requisite 10-fold coverage needed for reliable detection of heterozygous variants.

Additionally, certain types of genetic abnormalities are difficult to identify in sequencing data and have not been validated for clinical use including insertions, deletions, copy number alterations, long repetitive sequences, triplet repeat expansions, chromosomal rearrangements, polyploidy, repetitive regions including mono-, di- and tri-nucleotide repeats, GX rich regions, intronic variants outside the splice-site and epigenetic effects.

Variants believed to be benign based on medical literature, or with population frequencies greater than or equal to 1%, or resulting in synonymous amino acid changes, or occurring in 5' or 3' untranslated regions are generally not reported.

This report is a sample to be used solely for the purpose of evaluating functionality of the Tute Platform and should not be used in any clinical application.

## Sources

---

### REPORT SIGNATURES

---

Online Mendelian Inheritance in Man, OMIM (TM). Retrieved 0/26/2015 from <http://www.ncbi.nlm.nih.gov/omim/>  
ClinVar. Retrieved 0/26/2015 from <http://www.ncbi.nlm.nih.gov/clinvar/>



**ORDERING PROVIDER**

,

**SPECIMEN**

Collection Date:

Received Date:

Report Date:

**PATIENT**

Name:

Date of Birth:

Patient ID:

Gender:

Clinical Indication:

---

[Detailed clinical description.]

**TEST RESULTS SUMMARY**

---

Primary Result(s): [Findings related to clinical indication.]

Incidental/Secondary Result(s): [Incidental findings.]

PRIMARY/DIAGNOSTIC SEQUENCE VARIANT(S) DETECTED

| Gene    | Nucleotide Change | Protein Change | Zygoty | Tute Dx                                                                         |
|---------|-------------------|----------------|--------|---------------------------------------------------------------------------------|
| HFE     | c.845G>A          | p.C282Y        | het    | Hereditary hemochromatosis Hemochromatosis, juvenile, digenic                   |
| LYST    | c.2413delG        | p.E805fs       | het    | Chédiak-Higashi syndrome                                                        |
| BRIP1   | c.139C>G          | p.P47A         | het    | Breast cancer, early-onset                                                      |
| F5      | c.1601A>G         | p.Q534R        | het    | Thrombophilia due to factor V Leiden                                            |
| TGM1    | c.1552G>A         | p.V518M        | het    | Autosomal recessive congenital ichthyosis 1                                     |
| DPYD    | c.85C>T           | p.R29C         | hom    | Dihydropyrimidine dehydrogenase deficiency;not provided                         |
| PRSS1   | c.86A>T           | p.N29I         | het    | Hereditary pancreatitis;Hereditary pancreatitis                                 |
| FUT2    | c.461G>A          | p.W154X        | het    | Norwalk virus infection, resistance to                                          |
| SLC6A20 | c.596C>T          | p.T199M        | het    | Hyperglycinuria Iminoglycinuria, digenic                                        |
| PRSS1   | c.47C>T           | p.A16V         | het    | Hereditary pancreatitis                                                         |
| PRSS1   | c.161A>G          | p.N54S         | het    | Hereditary pancreatitis                                                         |
| ELAC2   | c.1621G>A         | p.A541T        | het    | Prostate cancer, hereditary, 2                                                  |
| OCA2    | c.913C>T          | p.R305W        | het    | Skin/hair/eye pigmentation, variation in, 1                                     |
| PRF1    | c.755A>G          | p.N252S        | het    | Hemophagocytic lymphohistiocytosis, familial, 2 Malignant lymphoma, non-Hodgkin |
| CYP2B6  | c.785A>G          | p.K262R        | het    | Efavirenz, poor metabolism of                                                   |
| ITGB3   | c.176T>C          | p.L59P         | hom    | Thrombocytopenia, neonatal alloimmune Posttransfusion purpura                   |
| CST3    | c.73G>A           | p.A25T         | het    | Age-related macular degeneration 11                                             |
| HEXB    | c.185T>C          | p.L62S         | hom    | Sandhoff disease, infantile type                                                |
| BBS2    | c.209G>A          | p.S70N         | hom    | Bardet-Biedl syndrome 2                                                         |
| BTD     | c.1177C>T         | p.P393S        | het    | Biotinidase deficiency                                                          |

## SECONDARY/INCIDENTAL SEQUENCE VARIANT(S) DETECTED

The American College of Medical Genetics and Genomics (ACMG) recently published a policy statement on clinical sequencing that emphasizes the possibility of recognizing and reporting incidental or secondary findings of medical value when conducting exome and genome sequencing. The ACMG recommends that laboratories performing clinical sequencing seek and report mutations of specified classes or types in the genes listed within the guidelines. This section of the report describes variants which fit the criteria outlined by ACMG for the reporting of incidental or secondary findings.

| Gene   | Nucleotide Change | Protein Change | Zygoty | Tute Dx                          |
|--------|-------------------|----------------|--------|----------------------------------|
| RYR1   | c.7336G>T         | p.G2446C       | het    | .                                |
| MUTYH  | c.1276C>T         | p.R426C        | het    | Adenomatous polyposis coli       |
| PMS2   | c.59G>A           | p.R20Q         | het    | Colorectal cancer, non-polyposis |
| MUTYH  | c.64G>A           | p.V22M         | het    | .                                |
| SDHD   | c.371A>G          | p.Q124R        | hom    | .                                |
| FBN1   | c.1415G>A         | p.C472Y        | hom    | .                                |
| TP53   | c.215C>G          | p.P72R         | het    | .                                |
| BRCA2  | c.7397T>C         | p.V2466A       | hom    | Breast cancer                    |
| MUTYH  | c.1014G>C         | p.Q338H        | het    | .                                |
| MEN1   | c.1636A>G         | p.T546A        | hom    | .                                |
| DSG2   | c.2318G>A         | p.R773K        | het    | .                                |
| APC    | c.5465T>A         | p.V1822D       | het    | .                                |
| PMS2   | c.1621A>G         | p.K541E        | hom    | Colorectal cancer, non-polyposis |
| COL3A1 | c.4059T>G         | p.H1353Q       | hom    | .                                |
| BRCA2  | c.1114A>C         | p.N372H        | het    | .                                |
| MYLK   | c.1486C>G         | p.L496V        | hom    | .                                |
| PCSK9  | c.1420G>A         | p.V474I        | hom    | .                                |
| APOB   | c.13013G>A        | p.S4338N       | hom    | .                                |
| PCSK9  | c.2009G>A         | p.G670E        | hom    | .                                |
| APOB   | c.6937A>G         | p.I2313V       | hom    | .                                |

## INTERPRETATION OF PRIMARY FINDINGS

### c.845G>A

The patient is heterozygous for a common missense polymorphism in the HFE gene which occurs at a frequency of 0.013% in the 1000 genomes project. OMIM reports 6 phenotypes associated with variants in the HFE gene including Hemochromatosis, [Transferrin serum level QTL2], susceptibility to Alzheimer disease, Microvascular complications of diabetes 7, susceptibility to Porphyria cutanea tarda, susceptibility to Porphyria variegata. This variant causes a nonsynonymous severe amino acid substitution (p.C282Y) which may alter protein function. ClinVar classifies this variant as

acid substitution (p.G221T) which may alter protein function. ClinVar classifies this variant as pathogenic, other and non-pathogenic and reports an association with Hereditary hemochromatosis, Porphyria cutanea tarda (susceptibility to), Porphyria variegata (susceptibility to), Hemochromatosis (juvenile) (digenic), Alzheimer disease (susceptibility to), Transferrin serum level quantitative trait locus 2, Microvascular complications of diabetes 7, not specified. This variant is predicted to be deleterious by SIFT and deleterious by PolyPhen2.

#### *c.2413delG*

The patient is heterozygous for a rare mutation in the LYST gene which doesn't occur in the 1000 genomes project. OMIM reports that variants in the LYST gene are associated with Chediak-Higashi syndrome. This variant causes a frameshift which may significantly alter protein expression or function. ClinVar classifies this variant as pathogenic and reports an association with Chédiak-Higashi syndrome.

#### *c.139C>G*

The patient is heterozygous for a rare missense mutation in the BRIP1 gene which doesn't occur in the 1000 genomes project. OMIM reports 2 phenotypes associated with variants in the BRIP1 gene including Breast cancer (early-onset), Fanconi anemia (complementation group J). This variant causes a nonsynonymous conservative amino acid substitution (p.P47A) which may alter protein function. ClinVar classifies this variant as pathogenic and other and reports an association with Breast cancer (early-onset), Neoplastic Syndromes (Hereditary). This variant is predicted to be deleterious by PolyPhen2.

#### *c.1601A>G*

The patient is heterozygous for a common missense polymorphism in the F5 gene which occurs at a frequency of 0.99% in the 1000 genomes project. OMIM reports 6 phenotypes associated with variants in the F5 gene including Factor V deficiency, Thrombophilia due to activated protein C resistance, Budd-Chiari syndrome, susceptibility to Pregnancy loss recurrent 1, susceptibility to Stroke (ischemic), susceptibility to Thrombophilia due to factor V Leiden. This variant causes a nonsynonymous conservative amino acid substitution (p.Q534R) which may alter protein function. ClinVar classifies this variant as pathogenic, untested and other and reports an association with Thrombophilia due to factor V Leiden, Ischemic stroke (susceptibility to), Budd-Chiari syndrome (susceptibility to), Recurrent abortion. This variant is predicted to be tolerable by SIFT

#### *c.1552G>A*

The patient is heterozygous for a common missense polymorphism in the TGM1 gene which occurs at a frequency of 0.0036% in the 1000 genomes project. OMIM reports that variants in the TGM1 gene are associated with Ichthyosis (congenital) (autosomal recessive 1). This variant causes a nonsynonymous conservative amino acid substitution (p.V518M) which may alter protein function. ClinVar classifies this variant as pathogenic and reports an association with Autosomal recessive congenital ichthyosis 1. This variant is predicted to be tolerable by SIFT and deleterious by PolyPhen2.

#### *c.85C>T*

The patient is homozygous for a common missense polymorphism in the DPYD gene which occurs at a frequency of 0.74% in the 1000 genomes project. OMIM reports 2 phenotypes associated with variants in the DPYD gene including 5-fluorouracil toxicity, Dihydropyrimidine dehydrogenase deficiency. This variant causes a nonsynonymous severe amino acid substitution (p.R29C) which may alter protein function. ClinVar classifies this variant as pathogenic and reports an association with Dihydropyrimidine dehydrogenase deficiency;. This variant is predicted to be tolerable by SIFT and deleterious by PolyPhen2.

#### *c.86A>T*

The patient is heterozygous for a common missense polymorphism in the PRSS1 gene which doesn't occur in the 1000 genomes project. OMIM reports 2 phenotypes associated with variants in the PRSS1 gene including Pancreatitis (hereditary), Trypsinogen deficiency. This variant causes a nonsynonymous moderate amino acid substitution (p.N29I) which may alter protein function. ClinVar

classifies this variant as pathogenic and reports an association with Hereditary pancreatitis;Hereditary pancreatitis. This variant is predicted to be deleterious by SIFT and benign by PolyPhen2.

#### *c.461G>A*

The patient is heterozygous for a common nonsense polymorphism in the FUT2 gene which occurs at a frequency of 0.32% in the 1000 genomes project. OMIM reports 3 phenotypes associated with variants in the FUT2 gene including [Bombay phenotype], resistance to Norwalk virus infection, Vitamin B12 plasma level QTL1. This variant introduces a premature stop codon which may lead to early termination of protein transcription. ClinVar classifies this variant as non-pathogenic, pathogenic and other and reports an association with SECRETOR/NONSECRETOR POLYMORPHISM, Norwalk virus infection ( resistance to), Vitamin b12 plasma level quantitative trait locus 1. This variant is predicted to be tolerable by SIFT

#### *c.596C>T*

The patient is heterozygous for a common missense polymorphism in the SLC6A20 gene which occurs at a frequency of 0.033% in the 1000 genomes project. OMIM reports 2 phenotypes associated with variants in the SLC6A20 gene including Hyperglycinuria, Iminoglycinuria (digenic). This variant causes a nonsynonymous moderate amino acid substitution (p.T199M) which may alter protein function. ClinVar classifies this variant as pathogenic and reports an association with Hyperglycinuria, Iminoglycinuria ( digenic). This variant is predicted to be deleterious by SIFT and deleterious by PolyPhen2.

#### *c.47C>T*

The patient is heterozygous for a common missense polymorphism in the PRSS1 gene which doesn't occur in the 1000 genomes project. OMIM reports 2 phenotypes associated with variants in the PRSS1 gene including Pancreatitis (hereditary), Trypsinogen deficiency. This variant causes a nonsynonymous moderate amino acid substitution (p.A16V) which may alter protein function. ClinVar classifies this variant as pathogenic and reports an association with Hereditary pancreatitis. This variant is predicted to be tolerable by SIFT and benign by PolyPhen2.

#### *c.161A>G*

The patient is heterozygous for a common missense polymorphism in the PRSS1 gene which doesn't occur in the 1000 genomes project. OMIM reports 2 phenotypes associated with variants in the PRSS1 gene including Pancreatitis (hereditary), Trypsinogen deficiency. This variant causes a nonsynonymous conservative amino acid substitution (p.N54S) which may alter protein function. ClinVar classifies this variant as pathogenic and reports an association with Hereditary pancreatitis. This variant is predicted to be tolerable by SIFT and benign by PolyPhen2.

#### *c.1621G>A*

The patient is heterozygous for a common missense polymorphism in the ELAC2 gene which occurs at a frequency of 0.023% in the 1000 genomes project. OMIM reports 2 phenotypes associated with variants in the ELAC2 gene including Combined oxidative phosphorylation deficiency 17, susceptibility to Prostate cancer (hereditary) (2). This variant causes a nonsynonymous moderate amino acid substitution (p.A541T) which may alter protein function. ClinVar classifies this variant as pathogenic and reports an association with Prostate cancer ( hereditary) ( 2). This variant is predicted to be tolerable by SIFT and possibly deleterious by PolyPhen2.

#### *c.913C>T*

The patient is heterozygous for a common missense polymorphism in the OCA2 gene which occurs at a frequency of 0.083% in the 1000 genomes project. OMIM reports 4 phenotypes associated with variants in the OCA2 gene including Albinism (brown oculocutaneous), Albinism (oculocutaneous) (type II), [Skin/hair/eye pigmentation 1 (blond)/brown hair], [Skin/hair/eye pigmentation 1 (blue)/nonblue eyes]. This variant causes a nonsynonymous moderate amino acid substitution (p.R305W) which may alter protein function. ClinVar classifies this variant as pathogenic and reports an association with Skin/hair/eye pigmentation ( variation in) ( 1). This variant is predicted to be

deleterious by SIFT and possibly deleterious by PolyPhen2.

#### *c.755A>G*

The patient is heterozygous for a common missense polymorphism in the PRF1 gene which occurs at a frequency of 0.0076% in the 1000 genomes project. OMIM reports 2 phenotypes associated with variants in the PRF1 gene including Hemophagocytic lymphohistiocytosis (familial) (2), Lymphoma (non-Hodgkin). This variant causes a nonsynonymous conservative amino acid substitution (p.N252S) which may alter protein function. ClinVar classifies this variant as pathogenic and reports an association with Hemophagocytic lymphohistiocytosis (familial) (2), Malignant lymphoma (non-Hodgkin). This variant is predicted to be tolerable by SIFT and benign by PolyPhen2.

#### *c.785A>G*

The patient is heterozygous for a common missense polymorphism in the CYP2B6 gene which doesn't occur in the 1000 genomes project. OMIM reports 2 phenotypes associated with variants in the CYP2B6 gene including poor metabolism of Efavirenz, susceptibility to Efavirenz central nervous system toxicity. This variant causes a nonsynonymous conservative amino acid substitution (p.K262R) which may alter protein function. ClinVar classifies this variant as pathogenic and reports an association with Efavirenz (poor metabolism of). This variant is predicted to be tolerable by SIFT and benign by PolyPhen2.

#### *c.176T>C*

The patient is homozygous for a common missense polymorphism in the ITGB3 gene which occurs at a frequency of 0.089% in the 1000 genomes project. OMIM reports 5 phenotypes associated with variants in the ITGB3 gene including Bleeding disorder (platelet-type) (16) (autosomal dominant), Glanzmann thrombasthenia, Purpura (posttransfusion), Thrombocytopenia (neonatal alloimmune), susceptibility to Myocardial infarction. This variant causes a nonsynonymous moderate amino acid substitution (p.L59P) which may alter protein function. ClinVar classifies this variant as non-pathogenic, pathogenic and other and reports an association with PL(A1)/(A2) ALLOANTIGEN POLYMORPHISM, Thrombocytopenia (neonatal alloimmune), Posttransfusion purpura, Myocardial infarction, Fracture (hip) (susceptibility to). This variant is predicted to be tolerable by SIFT and benign by PolyPhen2.

#### *c.73G>A*

The patient is heterozygous for a common missense polymorphism in the CST3 gene which occurs at a frequency of 0.21% in the 1000 genomes project. OMIM reports 2 phenotypes associated with variants in the CST3 gene including Cerebral amyloid angiopathy, Macular degeneration (age-related) (11). This variant causes a nonsynonymous moderate amino acid substitution (p.A25T) which may alter protein function. ClinVar classifies this variant as pathogenic and reports an association with Age-related macular degeneration 11. This variant is predicted to be tolerable by SIFT and benign by PolyPhen2.

#### *c.185T>C*

The patient is homozygous for a common missense polymorphism in the HEXB gene which occurs at a frequency of 0.98% in the 1000 genomes project. OMIM reports that variants in the HEXB gene are associated with Sandhoff disease (infantile) (juvenile) (and adult forms). This variant causes a nonsynonymous moderate amino acid substitution (p.L62S) which may alter protein function. ClinVar classifies this variant as pathogenic and reports an association with Sandhoff disease (infantile type). This variant is predicted to be tolerable by SIFT

#### *c.209G>A*

The patient is homozygous for a common missense polymorphism in the BBS2 gene which occurs at a frequency of 1.% in the 1000 genomes project. OMIM reports that variants in the BBS2 gene are associated with Bardet-Biedl syndrome 2. This variant causes a nonsynonymous conservative amino acid substitution (p.S70N) which may alter protein function. ClinVar classifies this variant as pathogenic and reports an association with Bardet-Biedl syndrome 2. This variant is predicted to be tolerable by SIFT

predicted to be tolerable by SIFT

#### *c.1177C>T*

The patient is heterozygous for a common missense polymorphism in the BTBD9 gene which occurs at a frequency of 0.0068% in the 1000 genomes project. OMIM reports that variants in the BTBD9 gene are associated with Biotinidase deficiency. This variant causes a nonsynonymous moderate amino acid substitution (p.P393S) which may alter protein function. ClinVar classifies this variant as non-pathogenic and pathogenic and reports an association with Biotinidase deficiency, Biotinidase deficiency. ARUP classifies this variant as Pathogenic. This variant is predicted to be tolerable by SIFT and benign by PolyPhen2.

### INTERPRETATION OF SECONDARY FINDINGS

---

#### *c.7336G>T*

The patient is heterozygous for a rare mutation in the RYR1 gene which doesn't occur in the 1000 genomes project. OMIM reports 5 phenotypes associated with variants in the RYR1 gene including Central core disease, King-Denborough syndrome, Minicore myopathy with external ophthalmoplegia, Neuromuscular disease (congenital) (with uniform type 1 fiber), Malignant hyperthermia susceptibility 1. This variant causes a nonsynonymous severe amino acid substitution (p.G2446C) which may alter protein function. This variant is predicted to be deleterious by SIFT and benign by PolyPhen2.

#### *c.1276C>T*

The patient is heterozygous for a rare missense mutation in the MUTYH gene which doesn't occur in the 1000 genomes project. OMIM reports 3 phenotypes associated with variants in the MUTYH gene including Adenomas (multiple colorectal), Colorectal adenomatous polyposis (autosomal recessive) (with pilomatricomas), Gastric cancer (somatic). This variant causes a nonsynonymous severe amino acid substitution (p.R426C) which may alter protein function. ClinVar classifies this variant as unknown and other and reports an association with , Neoplastic Syndromes ( Hereditary), MYH-associated polyposis. Invitae classifies this variant as Variant of uncertain significance. This variant is predicted to be tolerable by SIFT and deleterious by PolyPhen2.

#### *c.59G>A*

The patient is heterozygous for a common missense polymorphism in the PMS2 gene which occurs at a frequency of 0.076% in the 1000 genomes project. OMIM reports 2 phenotypes associated with variants in the PMS2 gene including Colorectal cancer (hereditary nonpolyposis) (type 4), Mismatch repair cancer syndrome. This variant causes a nonsynonymous conservative amino acid substitution (p.R20Q) which may alter protein function. ClinVar classifies this variant as non-pathogenic and untested and reports an association with , Lynch syndrome, not specified, Neoplastic Syndromes ( Hereditary). This variant is predicted to be tolerable by SIFT and possibly deleterious by PolyPhen2.

#### *c.64G>A*

The patient is heterozygous for a common missense polymorphism in the MUTYH gene which occurs at a frequency of 0.02% in the 1000 genomes project. OMIM reports 3 phenotypes associated with variants in the MUTYH gene including Adenomas (multiple colorectal), Colorectal adenomatous polyposis (autosomal recessive) (with pilomatricomas), Gastric cancer (somatic). This variant causes a nonsynonymous conservative amino acid substitution (p.V22M) which may alter protein function. ClinVar classifies this variant as non-pathogenic and reports an association with , not specified, MYH-associated polyposis, Neoplastic Syndromes ( Hereditary). Invitae classifies this variant as Benign. This variant is predicted to be deleterious by SIFT and possibly deleterious by PolyPhen2.

#### *c.371A>G*

The patient is homozygous for a common missense polymorphism in the SDHD gene which

The patient is homozygous for a common missense polymorphism in the SDHD gene which occurs at a frequency of 0.95% in the 1000 genomes project. OMIM reports 6 phenotypes associated with variants in the SDHD gene including Carcinoid tumors (intestinal), Cowden syndrome 3, Merkel cell carcinoma (somatic), Paraganglioma and gastric stromal sarcoma, Paragangliomas 1 (with or without deafness), Pheochromocytoma. This variant causes a nonsynonymous conservative amino acid substitution (p.Q124R) which may alter protein function. This variant is predicted to be tolerable by SIFT

#### *c.1415G>A*

The patient is homogeneous for a common missense polymorphism in the FBN1 gene which occurs at a frequency of 1.% in the 1000 genomes project. OMIM reports 8 phenotypes associated with variants in the FBN1 gene including Acromicric dysplasia, Aortic aneurysm (ascending) (and dissection), Ectopia lentis (familial), Geleophysic dysplasia 2, MASS syndrome, Marfan syndrome, Stiff skin syndrome, Weill-Marchesani syndrome 2 (dominant). This variant causes a nonsynonymous severe amino acid substitution (p.C472Y) which may alter protein function. This variant is predicted to be tolerable by SIFT and benign by PolyPhen2.

#### *c.215C>G*

The patient is heterozygous for a common missense polymorphism in the TP53 gene which occurs at a frequency of 0.54% in the 1000 genomes project. OMIM reports 11 phenotypes associated with variants in the TP53 gene including Adrenal cortical carcinoma, Breast cancer, Choroid plexus papilloma, Colorectal cancer, Hepatocellular carcinoma, Li-Fraumeni syndrome, Nasopharyngeal carcinoma, Osteosarcoma, Pancreatic cancer, Basal cell carcinoma 7, Glioma susceptibility 1. This variant causes a nonsynonymous moderate amino acid substitution (p.P72R) which may alter protein function. ClinVar classifies this variant as non-pathogenic and reports an association with CODON 72 POLYMORPHISM ( ) (rs1042522), , not specified, Neoplastic Syndromes ( Hereditary). This variant is predicted to be tolerable by SIFT and possibly deleterious by PolyPhen2.

#### *c.7397T>C*

The patient is homogeneous for a common missense polymorphism in the BRCA2 gene which occurs at a frequency of 0.98% in the 1000 genomes project. OMIM reports 9 phenotypes associated with variants in the BRCA2 gene including Fanconi anemia (complementation group D1), Pancreatic cancer, Prostate cancer, Wilms tumor, susceptibility to Breast cancer (male), Breast-ovarian cancer (familial) (2), Glioblastoma 3, Medulloblastoma, Pre-B-cell acute lymphoblastic leukemia. This variant causes a nonsynonymous moderate amino acid substitution (p.V2466A) which may alter protein function. ClinVar classifies this variant as untested, unknown and non-pathogenic and reports an association with Familial cancer of breast, Breast-ovarian cancer (familial 2), not specified. This variant is predicted to be tolerable by SIFT

#### *c.1014G>C*

The patient is heterozygous for a common missense polymorphism in the MUTYH gene which occurs at a frequency of 0.31% in the 1000 genomes project. OMIM reports 3 phenotypes associated with variants in the MUTYH gene including Adenomas (multiple colorectal), Colorectal adenomatous polyposis (autosomal recessive) (with pilomatricomas), Gastric cancer (somatic). This variant causes a nonsynonymous conservative amino acid substitution (p.Q338H) which may alter protein function. ClinVar classifies this variant as non-pathogenic and reports an association with , not specified, Neoplastic Syndromes ( Hereditary). This variant is predicted to be tolerable by SIFT and possibly deleterious by PolyPhen2.

#### *c.1636A>G*

The patient is homogeneous for a common missense polymorphism in the MEN1 gene which occurs at a frequency of 0.83% in the 1000 genomes project. OMIM reports 6 phenotypes associated with variants in the MEN1 gene including Adrenal adenoma (somatic), Angiofibroma (somatic), Carcinoid tumor of lung, Lipoma (somatic), Multiple endocrine neoplasia 1, Parathyroid adenoma (somatic). This variant causes a nonsynonymous moderate amino acid substitution (p.T546A) which may alter protein function. ClinVar classifies this variant as non-pathogenic and reports an association with , not specified. This variant is predicted to be tolerable by SIFT and



reports an association with , not specified. This variant is predicted to be tolerable by SIFT and benign by PolyPhen2.

#### *c.2318G>A*

The patient is heterozygous for a common missense polymorphism in the DSG2 gene which occurs at a frequency of 0.24% in the 1000 genomes project. OMIM reports 2 phenotypes associated with variants in the DSG2 gene including Arrhythmogenic right ventricular dysplasia 10, Cardiomyopathy (dilated) (1BB). This variant causes a nonsynonymous conservative amino acid substitution (p.R773K) which may alter protein function. ClinVar classifies this variant as non-pathogenic and reports an association with not specified. This variant is predicted to be tolerable by SIFT and benign by PolyPhen2.

#### *c.5465T>A*

The patient is heterozygous for a common missense polymorphism in the APC gene which occurs at a frequency of 0.87% in the 1000 genomes project. OMIM reports 8 phenotypes associated with variants in the APC gene including Adenoma (periampullary) (somatic), Adenomatous polyposis coli, Brain tumor-polyposis syndrome 2, Colorectal cancer (somatic), Desmoid disease (hereditary), Gardner syndrome, Gastric cancer (somatic), Hepatoblastoma (somatic). This variant causes a nonsynonymous severe amino acid substitution (p.V1822D) which may alter protein function. ClinVar classifies this variant as non-pathogenic and other and reports an association with Adenomatous polyposis coli, , not specified, Familial colorectal cancer, Neoplastic Syndromes ( Hereditary). This variant is predicted to be benign by PolyPhen2.

#### *c.1621A>G*

The patient is homogeneous for a common missense polymorphism in the PMS2 gene which occurs at a frequency of 0.88% in the 1000 genomes project. OMIM reports 2 phenotypes associated with variants in the PMS2 gene including Colorectal cancer (hereditary nonpolyposis) (type 4), Mismatch repair cancer syndrome. This variant causes a nonsynonymous moderate amino acid substitution (p.K541E) which may alter protein function. ClinVar classifies this variant as non-pathogenic and reports an association with Lynch syndrome. This variant is predicted to be tolerable by SIFT and benign by PolyPhen2.

#### *c.4059T>G*

The patient is homogeneous for a common missense polymorphism in the COL3A1 gene which occurs at a frequency of 1.% in the 1000 genomes project. OMIM reports 2 phenotypes associated with variants in the COL3A1 gene including Ehlers-Danlos syndrome (type III), Ehlers-Danlos syndrome (type IV). This variant causes a nonsynonymous conservative amino acid substitution (p.H1353Q) which may alter protein function. This variant is predicted to be tolerable by SIFT and benign by PolyPhen2.

#### *c.1114A>C*

The patient is heterozygous for a common missense polymorphism in the BRCA2 gene which occurs at a frequency of 0.25% in the 1000 genomes project. OMIM reports 9 phenotypes associated with variants in the BRCA2 gene including Fanconi anemia (complementation group D1), Pancreatic cancer, Prostate cancer, Wilms tumor, susceptibility to Breast cancer (male), Breast-ovarian cancer (familial) (2), Glioblastoma 3, Medulloblastoma, Pre-B-cell acute lymphoblastic leukemia. This variant causes a nonsynonymous moderate amino acid substitution (p.N372H) which may alter protein function. ClinVar classifies this variant as other, non-pathogenic and untested and reports an association with Breast-ovarian cancer ( familial 2), , not specified, Neoplastic Syndromes ( Hereditary). This variant is predicted to be tolerable by SIFT

#### *c.1486C>G*

The patient is homogeneous for a common missense polymorphism in the MYLK gene which occurs at a frequency of 1.% in the 1000 genomes project. OMIM reports that variants in the MYLK gene are associated with Aortic aneurysm (familial thoracic 7). This variant causes a nonsynonymous conservative amino acid substitution (p.L496V) which may alter protein function. This variant is predicted to be tolerable by SIFT and benign by PolyPhen2.

### *c.1420G>A*

The patient is homogeneous for a common missense polymorphism in the PCSK9 gene which occurs at a frequency of 0.87% in the 1000 genomes project. OMIM reports 2 phenotypes associated with variants in the PCSK9 gene including Hypercholesterolemia (familial) (3), Low density lipoprotein cholesterol level QTL 1. This variant causes a nonsynonymous conservative amino acid substitution (p.V474I) which may alter protein function. This variant is predicted to be tolerable by SIFT and benign by PolyPhen2.

### *c.13013G>A*

The patient is homogeneous for a common missense polymorphism in the APOB gene which occurs at a frequency of 0.63% in the 1000 genomes project. OMIM reports 2 phenotypes associated with variants in the APOB gene including Hypercholesterolemia (due to ligand-defective apo B), Hypobetalipoproteinemia. This variant causes a nonsynonymous conservative amino acid substitution (p.S4338N) which may alter protein function. ClinVar classifies this variant as probable-non-pathogenic and reports an association with not specified. This variant is predicted to be tolerable by SIFT and benign by PolyPhen2.

### *c.2009G>A*

The patient is homogeneous for a common missense polymorphism in the PCSK9 gene which occurs at a frequency of 0.9% in the 1000 genomes project. OMIM reports 2 phenotypes associated with variants in the PCSK9 gene including Hypercholesterolemia (familial) (3), Low density lipoprotein cholesterol level QTL 1. This variant causes a nonsynonymous moderate amino acid substitution (p.G670E) which may alter protein function. ClinVar classifies this variant as non-pathogenic and reports an association with Familial hypercholesterolemia. This variant is predicted to be tolerable by SIFT and benign by PolyPhen2.

### *c.6937A>G*

The patient is homogeneous for a common missense polymorphism in the APOB gene which occurs at a frequency of 0.99% in the 1000 genomes project. OMIM reports 2 phenotypes associated with variants in the APOB gene including Hypercholesterolemia (due to ligand-defective apo B), Hypobetalipoproteinemia. This variant causes a nonsynonymous conservative amino acid substitution (p.I2313V) which may alter protein function. This variant is predicted to be tolerable by SIFT and benign by PolyPhen2.

## RECOMMENDATIONS

---

Genetic counseling of the family is recommended to discuss the implications of this report.  
[Additional recommendations.]

## METHODS AND LIMITATIONS

---

This report is a sample to be used solely for the purpose of evaluating functionality of the Tute Platform and should not be used in any clinical application.

### Sequencing and Variant Detection

Whole exome sequencing was performed by solution-based hybridization which enriches for coding exons targeting DNA with specific baits. Sequencing was performed using the Illumina HiSeq 2500 to a minimum average exome depth of 90X. Sequencing reads were aligned to the reference genome (hg19) by BWA-MEM and variants were called using FreeBayes.

### Variant Analysis and Report Generation

Reported variants were analyzed using the Tute platform to identify those variants which are reported by medical literature to be pathogenic. All non-synonymous variants of allele frequency <1% reported by the 1000 genomes project and annotated as 'Pathogenic' or 'Probably Pathogenic' by ClinVar are reported in the table 'Primary/Diagnostic Sequence Variant(s) Detected'. Careful correlation of these variants with the clinical indications for the proband should be conducted by an experience medical geneticist to verify that reported findings are consistent with reported clinical phenotypes. Additionally, variants are included based on ACMG guidelines for the reporting of incidental findings in the table 'Secondary/Incidental Sequence Variant(s) Detected'.

### Validation of reported findings

Variants of interest should be confirmed by Sanger sequencing. The DNA immediately flanking each of these variants should be amplified genomic DNA followed by sequencing in both directions using fluorescent dideoxy sequencing.

### Limitations

Absence of a primary diagnostic finding identified by this test does not exclude the possibility of a genetic basis for the clinical condition for this proband. Certain genetic abnormalities are not detectable by the technologies used to generate this report. Specifically, detection of abnormal variants depends on the presence of these sequence variants in the sequencing data. This exome sequence test is designed to evaluate single nucleotide variants within the human exome; however, this technology is only able to sequence 90-95% of the human reference to the requisite 10-fold coverage needed for reliable detection of heterozygous variants.

Additionally, certain types of genetic abnormalities are difficult to identify in sequencing data and have not been validated for clinical use including insertions, deletions, copy number alterations, long repetitive sequences, triplet repeat expansions, chromosomal rearrangements, polyploidy, repetitive regions including mono-, di- and tri-nucleotide repeats, GX rich regions, intronic variants outside the splice-site and epigenetic effects.

Variants believed to be benign based on medical literature, or with population frequencies greater than or equal to 1%, or resulting in synonymous amino acid changes, or occurring in 5' or 3' untranslated regions are generally not reported.

This report is a sample to be used solely for the purpose of evaluating functionality of the Tute Platform and should not be used in any clinical application.

## Sources

---

### REPORT SIGNATURES

---

Online Mendelian Inheritance in Man, OMIM (TM). Retrieved 0/26/2015 from <http://www.ncbi.nlm.nih.gov/omim/>  
ClinVar. Retrieved 0/26/2015 from <http://www.ncbi.nlm.nih.gov/clinvar/>
