# Supplementary material for: Whole genome sequencing of one complex pedigree illustrates challenges with genomic medicine
Source: PubMed Central journal article supplement (PMC5322674; doi:10.1186/s12920-017-0246-5), 2017-02-23
Supplement: 12920_2017_246_MOESM3_ESM.pdf [file 12920_2017_246_MOESM3_ESM.pdf]

## 1 Patient data

Name, Firstname: K10031-10232

Date of birth:

Gender:

Male  Female

## 2 Query

---

---

---

### Reference:

Köhler S, Schulz MH, Krawitz P, Bauer S, Dölken S, Ott CE, Mundlos C, Horn D, Mundlos S, Robinson PN  
Clinical Diagnostics in Human Genetics with Semantic Similarity Searches in Ontologies  
*The American Journal of Human Genetics* 85, pp. 457-464, Oktober 2009.

*Query Terms:*

- Caesarian section (HP:0011410)
- Narrow forehead (HP:0000341)
- Low frustration tolerance (HP:0000744)
- Poor eye contact (HP:0000817)
- Delayed speech and language development (HP:0000750)
- Hyperesthesia (HP:0100963)
- Anxiety (HP:0000739)
- Irritability (HP:0000737)
- Short attention span (HP:0000736)
- Growth hormone deficiency (HP:0000824)
- Almond-shaped palpebral fissure (HP:0007874)
- Obstructive sleep apnea (HP:0002870)
- Excessive daytime sleepiness (HP:0002189)
- Infantile muscular hypotonia (HP:0008947)
- Cryptorchidism (HP:0000028)
- Lack of peer relationships (HP:0002332)
- Lack of insight (HP:0000757)
- Hair-pulling (HP:0012167)
- Maternal diabetes (HP:0009800)
- Skin-picking (HP:0012166)
- Poor fine motor coordination (HP:0007010)
- Hypersomnia (HP:0100786)
- Impaired social reciprocity (HP:0012760)
- Depression (HP:0000716)
- Aggressive behavior (HP:0000718)
- Somnolence (HP:0001262)
- Polyphagia (HP:0002591)
- Scoliosis (HP:0002650)
- Dysarthria (HP:0001260)
- Pain insensitivity (HP:0007021)

**Reference:**

Köhler S, Schulz MH, Krawitz P, Bauer S, Dölken S, Ott GE, Mundlos C, Horn D, Mundlos S, Robinson PN  
 Clinical Diagnostics in Human Genetics with Semantic Similarity Searches in Ontologies  
*The American Journal of Human Genetics* 85(1):145-164, October 2009

- Nail-biting (HP:0012170)
- Intellectual disability, mild (HP:0001256)
- Impaired social reciprocity (HP:0000728)
- Downslanted palpebral fissures (HP:0000494)
- Inflexible adherence to routines or rituals (HP:0000732)

---

*Inheritance:* none

---

*Similarity measure:* Resnik (not symmetric)

---

### 3 Results

| <i>p-Value</i> | <i>Score</i> | <i>Disease entry</i>                                                                                                                                                                                                                                | <i>Known Genes</i> |
|----------------|--------------|-----------------------------------------------------------------------------------------------------------------------------------------------------------------------------------------------------------------------------------------------------|--------------------|
| 0.0001         | 3.2383       | #176270 PRADER-WILLI SYNDROME;<br>PWS;;PRADER-LABHART-WILLI<br>SYNDROMEPRADER-WILLI SYNDROME<br>CHROMOSOME REGION, INCLUDED; PWCR,<br>INCLUDED;;PRADER-WILLI-LIKE SYNDROME<br>ASSOCIATED WITH CHROMOSOME 6, IN-<br>CLUDED (OMIM:176270)             | SNRPN, NDN         |
| 0.0001         | 2.9703       | #613406 CHROMOSOME 15Q24 DELETION<br>SYNDROMECHROMOSOME 15Q24 DUPLICA-<br>TION SYNDROME, INCLUDED (OMIM:613406)                                                                                                                                     |                    |
| 0.0001         | 2.7799       | #606232 CHROMOSOME 22Q13.3 DELETION<br>SYNDROME;;TELOMERIC 22Q13 MONO-<br>SOMY SYNDROME;;PHELAN-MCDERMID<br>SYNDROME (OMIM:606232)                                                                                                                  | SHANK3             |
| 0.0001         | 2.7473       | #300260 LUBS X-LINKED MENTAL RE-<br>TARDATION SYNDROME; MRXSL;;MECP2<br>DUPLICATION SYNDROME;;MENTAL RE-<br>TARDATION, X-LINKED, SYNDROMIC, LUBS<br>TYPE;;MENTAL RETARDATION, X-LINKED,<br>WITH RECURRENT RESPIRATORY INFEC-<br>TIONS (OMIM:300260) | MECP2              |
| 0.0001         | 2.6822       | #610253 KLEEFSTRA SYN-<br>DROME;;CHROMOSOME 9Q34.3 DELETION<br>SYNDROME;;9Q- SYNDROME;;9Q SUBTELOM-<br>ERIC DELETION SYNDROME (OMIM:610253)                                                                                                         | EHMT1              |
| 0.0001         | 2.6294       | #610883 POTOCKI-LUPSKI SYNDROME;<br>PTLS;;CHROMOSOME 17P11.2 DUPLICATION<br>SYNDROME (OMIM:610883)                                                                                                                                                  |                    |
| 0.0001         | 2.5905       | NORRIE DISEASE (OMIM:310600)                                                                                                                                                                                                                        | NDP                |
| 0.0001         | 2.5823       | FRAGILE X MENTAL RETARDATION SYN-<br>DROME (OMIM:300624)                                                                                                                                                                                            | FMR1               |

---

#### Reference:

Köhler S, Schulz MH, Krawitz P, Bauer S, Dölken S, Ott CE, Mundlos C, Horn D, Mundlos S, Robinson PN  
Clinical Diagnostics in Human Genetics with Semantic Similarity Searches in Ontologies  
*The American Journal of Human Genetics* 85, pp. 457-464, Oktober 2009.

| <i>p-Value</i> | <i>Score</i> | <i>Disease entry</i>                                                                                                                                                                                                                                                                           | <i>Known Genes</i> |
|----------------|--------------|------------------------------------------------------------------------------------------------------------------------------------------------------------------------------------------------------------------------------------------------------------------------------------------------|--------------------|
| 0.0001         | 2.5222       | #261600 PHENYLKETONURIA; PKU;;PHENYLALANINE HYDROXYLASE DEFICIENCY;;PAH DEFICIENCY;;OLIGOPHRENIA PHENYLPYRUVICA;;FOLLING DISEASE-HYPERPHENYLALANINEMIA, NON-PKU MILD, INCLUDED;;HPA, NON-PKU MILD, INCLUDED;;PHENYLKETONURIA, MATERNAL, INCLUDED (OMIM:261600)                                 | PAH                |
| 0.0001         | 2.5131       | #300352 CEREBRAL CREATINE DEFICIENCY SYNDROME 1; CCDS1;;CREATINE DEFICIENCY SYNDROME, X-LINKED;;CREATINE TRANSPORTER DEFECT;;MENTAL RETARDATION, X-LINKED, WITH SEIZURES, SHORT STATURE, AND MIDFACEHYPOPLASIA;;MENTAL RETARDATION, X-LINKED, WITH CREATINE TRANSPORT DEFICIENCY (OMIM:300352) | SLC6A8             |

## 4 Further analysis

(Shown is a list of features that are special to the corresponding OMIM entry and not shared by another OMIM entry from the result list.)

| <i>OMIM entry</i> | <i>Features</i>                                                                                                                                                                                                     |
|-------------------|---------------------------------------------------------------------------------------------------------------------------------------------------------------------------------------------------------------------|
| #176270           | PRADER-WILLI SYNDROME; PWS;;PRADER-LABHART-WILLI SYNDROMEPRADER-WILLI SYNDROME CHROMOSOME REGION, INCLUDED; PWCR, INCLUDED;;PRADER-WILLI-LIKE SYNDROME ASSOCIATED WITH CHROMOSOME 6, INCLUDED (OMIM:176270)         |
| #613406           | CHROMOSOME 15Q24 DELETION SYNDROMECHROMOSOME 15Q24 DUPLICATION SYNDROME, INCLUDED (OMIM:613406)                                                                                                                     |
| #606232           | CHROMOSOME 22Q13.3 DELETION SYNDROME;;TELOMERIC 22Q13 MONOSOMY SYNDROME;;PHELAN-MCDERMID SYNDROME (OMIM:606232)                                                                                                     |
| #300260           | LUBS X-LINKED MENTAL RETARDATION SYNDROME; MRXSL;;MECP2 DUPLICATION SYNDROME;;MENTAL RETARDATION, X-LINKED, SYNDROMIC, LUBS TYPE;;MENTAL RETARDATION, X-LINKED, WITH RECURRENT RESPIRATORY INFECTIONS (OMIM:300260) |
| #610253           | KLEEFSTRA SYNDROME;;CHROMOSOME 9Q34.3 DELETION SYNDROME;;9Q- SYNDROME;;9Q SUBTELOMERIC DELETION SYNDROME (OMIM:610253)                                                                                              |
| #610883           | POTOCKI-LUPSKI SYNDROME; PTLS;;CHROMOSOME 17P11.2 DUPLICATION SYNDROME (OMIM:610883)                                                                                                                                |

### Reference:

Köhler S, Schulz MH, Krawitz P, Bauer S, Dölken S, Ott CE, Mundlos C, Horn D, Mundlos S, Robinson PN Clinical Diagnostics in Human Genetics with Semantic Similarity Searches in Ontologies *The American Journal of Human Genetics* 85, pp. 457-464, Oktober 2009.

---

---

*OMIM entry Features*

---

---

NORRIE DISEASE (OMIM:310600)

---

FRAGILE X MENTAL RETARDATION SYNDROME (OMIM:300624)

---

#261600 PHENYLKETONURIA; PKU;;PHENYLALANINE HYDROXY-LASE DEFICIENCY;;PAH DEFICIENCY;;OLIGOPHRENIA PHENYLPYRUVICA;;FOLLING DISEASEHYPERPHENYLALANINEMIA, NON-PKU MILD, INCLUDED;;HPA, NON-PKU MILD, INCLUDED;;PHENYLKETONURIA, MATERNAL, INCLUDED (OMIM:261600)

---

#300352 CEREBRAL CREATINE DEFICIENCY SYNDROME 1; CCDS1;;CREATINE DEFICIENCY SYNDROME, X-LINKED;;CREATINE TRANSPORTER DEFECT;;MENTAL RETARDATION, X-LINKED, WITH SEIZURES, SHORT STATURE, AND MIDFACEHYPOPLASIA;;MENTAL RETARDATION, X-LINKED, WITH CREATINE TRANSPORT DEFICIENCY (OMIM:300352)

**Abnormality of head or neck:**

- Myopathic facies (HP:0002058)
- Mask-like facies (HP:0000298)

**Abnormality of the abdomen:**

- Ileus (HP:0002595)
- Aganglionic megacolon (HP:0002251)

**Abnormality of the ear:**

- Underfolded superior helices (HP:0008583)

**Abnormality of the eye:**

- Exotropia (HP:0000577)

**Abnormality of the integument:**

- Cutis laxa (HP:0000973)

**Abnormality of the nervous system:**

- Poor hand-eye coordination (HP:0007057)
  - Aganglionic megacolon (HP:0002251)
  - Dystonia (HP:0001332)
- 
- 

---

**Reference:**

Köhler S, Schulz MH, Krawitz P, Bauer S, Dölken S, Ott CE, Mundlos C, Horn D, Mundlos S, Robinson PN  
Clinical Diagnostics in Human Genetics with Semantic Similarity Searches in Ontologies  
*The American Journal of Human Genetics* 85, pp. 457-464, Oktober 2009.

## 1 Patient data

Name, Firstname: K10031-10133

Date of birth:

Gender:

Male  Female

## 2 Query

---

---

---

### Reference:

Köhler S, Schulz MH, Krawitz P, Bauer S, Dölken S, Ott CE, Mundlos C, Horn D, Mundlos S, Robinson PN  
Clinical Diagnostics in Human Genetics with Semantic Similarity Searches in Ontologies  
*The American Journal of Human Genetics* 85, pp. 457-464, Oktober 2009.

*Query Terms:*

- Arthritis (HP:0001369)
- Paresthesia (HP:0003401)
- Myopia (HP:0000545)
- Anxiety (HP:0000739)
- Ischemic stroke (HP:0002140)
- Migraine (HP:0002076)
- Heat intolerance (HP:0002046)
- Resting tremor (HP:0002322)
- Urinary retention (HP:0000016)
- Apraxia (HP:0002186)
- Nausea (HP:0002018)
- Urinary incontinence (HP:0000020)
- Bradycardia (HP:0001662)
- Auditory hallucinations (HP:0008765)
- Tachycardia (HP:0001649)
- Patent foramen ovale (HP:0001655)
- Lymphadenopathy (HP:0002716)
- Asthma (HP:0002099)
- Seizures (HP:0001250)
- Depression (HP:0000716)
- Diplopia (HP:0000651)
- Gastroparesis (HP:0002578)
- Postural tremor (HP:0002174)
- Arthralgia (HP:0002829)
- Dysarthria (HP:0001260)
- Acrocyanosis (HP:0001063)
- Muscle weakness (HP:0001324)
- Frequent falls (HP:0002359)
- Joint stiffness (HP:0001387)
- Syncope (HP:0001279)

**Reference:**

Köhler S, Schulz MH, Krawitz P, Bauer S, Dölken S, Ott CE, Mundlos C, Horn D, Mundlos S, Robinson PN  
 Clinical Diagnostics in Human Genetics with Semantic Similarity Searches in Ontologies  
*The American Journal of Human Genetics* 85(5):1007-1017 October 2009.

- Dyspnea (HP:0002094)
- Fatigue (HP:0012378)
- Visual hallucinations (HP:0002307)
- Astigmatism (HP:0000483)

---

|                            |                        |
|----------------------------|------------------------|
| <i>Inheritance:</i>        | none                   |
| <i>Similarity measure:</i> | Resnik (not symmetric) |

---

### 3 Results

| <i>p-Value</i> | <i>Score</i> | <i>Disease entry</i>                                                                                                                                                                                                                                                                                            | <i>Known Genes</i> |
|----------------|--------------|-----------------------------------------------------------------------------------------------------------------------------------------------------------------------------------------------------------------------------------------------------------------------------------------------------------------|--------------------|
| 0.0018         | 2.6115       | TEMPORAL ARTERITIS (OMIM:187360)                                                                                                                                                                                                                                                                                |                    |
| 0.0018         | 2.5548       | #176000 PORPHYRIA, ACUTE INTERMITTENT;;AIP;;PORPHYRIA, SWEDISH TYPE;;PORPHOBILINOGEN DEAMINASE DEFICIENCY;;PBGD DEFICIENCY;;UROPORPHYRINOGEN SYNTHASE DEFICIENCY;;UPS DEFICIENCY;PORPHYRIA, ACUTE INTERMITTENT, NONERYTHROID VARIANT, INCLUDED;;PORPHYRIA, CHESTER TYPE, INCLUDED; PORC, INCLUDED (OMIM:176000) | HMBS               |
| 0.0018         | 2.2435       | LEGIONELLOSIS (ORPHANET:549)                                                                                                                                                                                                                                                                                    |                    |
| 0.0018         | 2.1483       | #300623 FRAGILE X TREMOR/ATAXIA SYNDROME; FXTAS (OMIM:300623)                                                                                                                                                                                                                                                   | FMR1               |
| 0.0018         | 2.1410       | TYPHOID (ORPHANET:99745)                                                                                                                                                                                                                                                                                        |                    |
| 0.0018         | 2.1299       | HEMORRHAGIC FEVER - RENAL SYNDROME (ORPHANET:340)                                                                                                                                                                                                                                                               |                    |
| 0.0018         | 2.0991       | #121300 COPROPORPHYRIA, HEREDITARY; HCP;;COPROPORPHYRINOGEN OXIDASE DEFICIENCY;;CPOX DEFICIENCY;;CPO DEFICIENCY;;CPX DEFICIENCY;HARDEROPORPHYRIA, INCLUDED (OMIM:121300)                                                                                                                                        | CPOX               |
| 0.0018         | 2.0177       | SCRUB TYPHUS (ORPHANET:83317)                                                                                                                                                                                                                                                                                   |                    |
| 0.0018         | 1.8736       | LYME DISEASE (ORPHANET:91546)                                                                                                                                                                                                                                                                                   |                    |
| 0.0018         | 1.8399       | RABIES (ORPHANET:770)                                                                                                                                                                                                                                                                                           |                    |

### 4 Further analysis

(Shown is a list of features that are special to the corresponding OMIM entry and not shared by another OMIM entry from the result list.)

---

#### Reference:

Köhler S, Schulz MH, Krawitz P, Bauer S, Dölken S, Ott CE, Mundlos C, Horn D, Mundlos S, Robinson PN Clinical Diagnostics in Human Genetics with Semantic Similarity Searches in Ontologies *The American Journal of Human Genetics* 85, pp. 457-464, Oktober 2009.



---

---

OMIM en-try      Features

---

---

TEMPORAL ARTERITIS (OMIM:187360)

---

#176000 PORPHYRIA, ACUTE INTERMITTENT;;AIP;;PORPHYRIA, SWEDISH TYPE;;PORPHOBILINOGEN DEAMINASE DEFICIENCY;;PBGD DEFICIENCY;;UROPORPHYRINOGEN SYNTHASE DEFICIENCY;;UPS DEFICIENCYPORPHYRIA, ACUTE INTERMITTENT, NONERYTHROID VARIANT, INCLUDED;;PORPHYRIA, CHESTER TYPE, INCLUDED; PORC, INCLUDED (OMIM:176000)

---

LEGIONELLOSIS (ORPHANET:549)

---

#300623 FRAGILE X TREMOR/ATAXIA SYNDROME; FXTAS (OMIM:300623)

---

TYPHOID (ORPHANET:99745)

---

HEMORRHAGIC FEVER - RENAL SYNDROME (ORPHANET:340)

---

#121300 COPROPORPHYRIA, HEREDITARY; HCP;;COPROPORPHYRINOGEN OXIDASE DEFICIENCY;;CPOX DEFICIENCY;;CPO DEFICIENCY;;CPX DEFICIENCYHARDEROPORPHYRIA, INCLUDED (OMIM:121300)

---

SCRUB TYPHUS (ORPHANET:83317)

---

LYME DISEASE (ORPHANET:91546)

---

RABIES (ORPHANET:770)

**Abnormality of head or neck:**

- Excessive salivation (HP:0003781)

**Abnormality of the nervous system:**

- Cerebral palsy (HP:0100021)
- Attention deficit hyperactivity disorder (HP:0007018)

**Abnormality of the respiratory system:**

- Vocal cord paresis (HP:0001604)
- 
- 

---

**Reference:**

Köhler S, Schulz MH, Krawitz P, Bauer S, Dölken S, Ott CE, Mundlos C, Horn D, Mundlos S, Robinson PN  
Clinical Diagnostics in Human Genetics with Semantic Similarity Searches in Ontologies  
*The American Journal of Human Genetics* 85, pp. 457-464, Oktober 2009.

## 1 Patient data

Name, Firstname: K10031-10145

Date of birth:

Gender: Male  Female

## 2 Query

---

---

*Query Terms:*

- Hypotension (HP:0002615)
- Abnormality of iron homeostasis (HP:0011031)
- Osteoporosis (HP:0000939)
- Mood swings (HP:0000720)
- Anxiety (HP:0000739)
- Syncope (HP:0001279)
- Obsessive-compulsive behavior (HP:0000722)
- Heat intolerance (HP:0002046)

---

*Inheritance:* none

---

*Similarity measure:* Resnik (not symmetric)

---

---

## 3 Results

| <i>p-Value</i> | <i>Score</i> | <i>Disease entry</i>                                                                                                                                                                                                            | <i>Known Genes</i> |
|----------------|--------------|---------------------------------------------------------------------------------------------------------------------------------------------------------------------------------------------------------------------------------|--------------------|
| 0.0048         | 2.8899       | AROMATIC L-AMINO ACID DECARBOXYLASE DEFICIENCY (OMIM:608643)                                                                                                                                                                    | DDC                |
| 0.0048         | 2.8226       | #615830 PIGMENTED NODULAR ADRENOCORTICAL DISEASE, PRIMARY, 4; PPNAD4;;CUSHING SYNDROME, ADRENAL, DUE TO PPNAD4;;CHROMOSOME 19P13 DUPLICATION SYNDROMEACTH-INDEPENDENT ADRENAL CUSHING SYNDROME, SOMATIC, INCLUDED (OMIM:615830) | PRKACA             |

---

### Reference:

Köhler S, Schulz MH, Krawitz P, Bauer S, Dölken S, Ott CE, Mundlos C, Horn D, Mundlos S, Robinson PN Clinical Diagnostics in Human Genetics with Semantic Similarity Searches in Ontologies *The American Journal of Human Genetics* 85, pp. 457-464, Oktober 2009.

| <i>p-Value</i> | <i>Score</i> | <i>Disease entry</i>                                                                                                                                                                                       | <i>Known Genes</i> |
|----------------|--------------|------------------------------------------------------------------------------------------------------------------------------------------------------------------------------------------------------------|--------------------|
| 0.0048         | 2.3584       | #615962 GLUCOCORTICOID RESISTANCE, GENERALIZED;;GLUCOCORTICOID RECEPTOR DEFICIENCY;;GCCR DEFICIENCY;;GCR DEFICIENCY;;GRL DEFICIENCY;;CORTISOL RESISTANCE FROM GLUCOCORTICOID RECEPTOR DEFECT (OMIM:615962) | NR3C1              |
| 0.0048         | 2.2984       | NIPAH VIRUS DISEASE (ORPHANET:99825)                                                                                                                                                                       |                    |
| 0.0048         | 2.2960       | NEPHROGENIC SYNDROME OF INAPPROPRIATE ANTIDIURESIS (OMIM:300539)                                                                                                                                           | AVPR2              |
| 0.0048         | 1.4841       | #118700 CHOREA, BENIGN HEREDITARY; BHC;;BCH;;HEREDITARY PROGRESSIVE CHOREA WITHOUT DEMENTIA (OMIM:118700)                                                                                                  | NKX2-1             |
| 0.0048         | 1.4841       | PANIC DISORDER 1 (OMIM:167870)                                                                                                                                                                             |                    |
| 0.0048         | 1.2550       | #164230 OBSESSIVE-COMPULSIVE DISORDER; OCD (OMIM:164230)                                                                                                                                                   |                    |
| 0.0070         | 3.5068       | #223900 NEUROPATHY, HEREDITARY SENSORY AND AUTONOMIC, TYPE III; HSAN3;;HSAN III;;DYSAUTONOMIA, FAMILIAL; DYS; FD;;RILEY-DAY SYNDROME (OMIM:223900)                                                         | IKBKAP             |
| 0.0070         | 3.1603       | #606159 NEURODEGENERATION WITH BRAIN IRON ACCUMULATION 3; NBIA3;;NEUROFERRITINOPATHY;;BASAL GANGLIA DISEASE, ADULT-ONSET (OMIM:606159)                                                                     | FTL                |

## 4 Further analysis

(Shown is a list of features that are special to the corresponding OMIM entry and not shared by another OMIM entry from the result list.)

| <i>OMIM entry</i>                                            | <i>Features</i>                                                                                                                                                                                                         |
|--------------------------------------------------------------|-------------------------------------------------------------------------------------------------------------------------------------------------------------------------------------------------------------------------|
| AROMATIC L-AMINO ACID DECARBOXYLASE DEFICIENCY (OMIM:608643) |                                                                                                                                                                                                                         |
| #615830                                                      | PIGMENTED NODULAR ADRENOCORTICAL DISEASE, PRIMARY, 4; PPNAD4;;CUSHING SYNDROME, ADRENAL, DUE TO PPNAD4;;CHROMOSOME 19P13 DUPLICATION SYNDROMEACTH-INDEPENDENT ADRENAL CUSHING SYNDROME, SOMATIC, INCLUDED (OMIM:615830) |

### Reference:

Köhler S, Schulz MH, Krawitz P, Bauer S, Dölken S, Ott CE, Mundlos C, Horn D, Mundlos S, Robinson PN Clinical Diagnostics in Human Genetics with Semantic Similarity Searches in Ontologies *The American Journal of Human Genetics* 85, pp. 457-464, Oktober 2009.

---



---

*OMIM entry Features*

---



---

#615962 GLUCOCORTICOID RESISTANCE, GENERALIZED;;GLUCOCORTICOID RECEPTOR DEFICIENCY;;GCCR DEFICIENCY;;GCR DEFICIENCY;;GRL DEFICIENCY;;CORTISOL RESISTANCE FROM GLUCOCORTICOID RECEPTOR DEFECT (OMIM:615962)

NIPAH VIRUS DISEASE (ORPHANET:99825)

NEPHROGENIC SYNDROME OF INAPPROPRIATE ANTIDIURESIS (OMIM:300539)

#118700 CHOREA, BENIGN HEREDITARY; BHC;;BCH;;HEREDITARY PROGRESSIVE CHOREA WITHOUT DEMENTIA (OMIM:118700)

PANIC DISORDER 1 (OMIM:167870)

#164230 OBSESSIVE-COMPULSIVE DISORDER; OCD (OMIM:164230)

#223900 NEUROPATHY, HEREDITARY SENSORY AND AUTONOMIC, TYPE III; HSAN3;;HSAN III;;DYSAUTONOMIA, FAMILIAL; DYS; FD;;RILEY-DAY SYNDROME (OMIM:223900)

#606159 NEURODEGENERATION WITH BRAIN IRON ACCUMULATION 3; NBIA3;;NEUROFERRITINOPATHY;;BASAL GANGLIA DISEASE, ADULT-ONSET (OMIM:606159)

**Abnormality of head or neck:**

- Blepharospasm (HP:0000643)

**Abnormality of metabolism/homeostasis:**

- Decreased serum ferritin (HP:0012343)

**Abnormality of the abdomen:**

- Dysphagia (HP:0002015)

**Abnormality of the eye:**

- Abnormality of eye movement (HP:0000496)

**Abnormality of the musculature:**

- Spasticity (HP:0001257)

**Abnormality of the nervous system:**

- Bradykinesia (HP:0002067)
- Developmental regression (HP:0002376)
- Parkinsonism (HP:0001300)
- Neurodegeneration (HP:0002180)
- Cavitation of the basal ganglia (HP:0007007)
- Rigidity (HP:0002063)
- Mutism (HP:0002300)
- Ataxia (HP:0001251)
- Dysphagia (HP:0002015)
- Blepharospasm (HP:0000643)
- Spasticity (HP:0001257)
- Writer's cramp (HP:0002356)
- Disinhibition (HP:0000734)
- Anarthria (HP:0002425)
- Laryngeal dystonia (HP:0012049)
- Dementia (HP:0000726)

**Abnormality of the voice:**

- Laryngeal dystonia (HP:0012049)

---



---

**Reference:**

Köhler S, Schulz MH, Krawitz P, Bauer S, Dölken S, Ott CE, Mundlos C, Horn D, Mundlos S, Robinson PN  
 Clinical Diagnostics in Human Genetics with Semantic Similarity Searches in Ontologies  
*The American Journal of Human Genetics* 85, pp. 457-464, Oktober 2009.

---

**Reference:**

Köhler S, Schulz MH, Krawitz P, Bauer S, Dölken S, Ott CE, Mundlos C, Horn D, Mundlos S, Robinson PN  
Clinical Diagnostics in Human Genetics with Semantic Similarity Searches in Ontologies  
*The American Journal of Human Genetics* 85, pp. 457-464, Oktober 2009.
